# Supplementary material for: The effects of potato virus Y-derived virus small interfering RNAs of three biologically distinct strains on potato (Solanum tuberosum) transcriptome
Source: Virol J. 2017 Jul 17;14:129. doi: 10.1186/s12985-017-0803-8 (PMC5513076; doi:10.1186/s12985-017-0803-8)
Supplement: Supplementary file 4 — psRobot predicted PVY-NTN vsiRNAs target coding transcripts. (XLSX 1242 kb) [file 12985_2017_803_MOESM4_ESM.xlsx]

## Sheet: NTN analysis
Table S3. psRobot predicted PVY-NTN vsiRNAs target coding transcripts.
>t0000011_37906	Score: 1.8	PGSC0003DMG400010559|PGSC0003DMT400027382
>t0000011_37906	Score: 2.5	PGSC0003DMG400011324|PGSC0003DMT400029448
>t0000011_37906	Score: 2.5	PGSC0003DMG400011324|PGSC0003DMT400029449
>t0000011_37906	Score: 2.0	PGSC0003DMG401012812|PGSC0003DMT400033353
>t0000011_37906	Score: 2.5	PGSC0003DMG400031088|PGSC0003DMT400079833
>t0000011_37906	Score: 2.5	PGSC0003DMG400043777|PGSC0003DMT400094206
>t0000015_32919	Score: 2.5	PGSC0003DMG400006804|PGSC0003DMT400017547
>t0000017_29583	Score: 2.5	PGSC0003DMG400000416|PGSC0003DMT400001101
>t0000017_29583	Score: 2.5	PGSC0003DMG400000416|PGSC0003DMT400001100
>t0000017_29583	Score: 2.5	PGSC0003DMG400016767|PGSC0003DMT400043200
>t0000017_29583	Score: 2.0	PGSC0003DMG400018423|PGSC0003DMT400047404
>t0000017_29583	Score: 2.2	PGSC0003DMG400038860|PGSC0003DMT400089289
>t0000017_29583	Score: 2.2	PGSC0003DMG400035350|PGSC0003DMT400085779
>t0000020_21168	Score: 2.5	PGSC0003DMG400023453|PGSC0003DMT400060294
>t0000022_19965	Score: 2.5	PGSC0003DMG400007175|PGSC0003DMT400018486
>t0000022_19965	Score: 2.5	PGSC0003DMG400010778|PGSC0003DMT400027971
>t0000022_19965	Score: 2.5	PGSC0003DMG400008864|PGSC0003DMT400022863
>t0000022_19965	Score: 2.5	PGSC0003DMG400010778|PGSC0003DMT400027972
>t0000022_19965	Score: 2.2	PGSC0003DMG400022634|PGSC0003DMT400058294
>t0000022_19965	Score: 2.5	PGSC0003DMG400022311|PGSC0003DMT400057460
>t0000022_19965	Score: 2.2	PGSC0003DMG400022634|PGSC0003DMT400058293
>t0000022_19965	Score: 2.5	PGSC0003DMG400023361|PGSC0003DMT400060046
>t0000023_19684	Score: 2.2	PGSC0003DMG400004168|PGSC0003DMT400010674
>t0000023_19684	Score: 2.2	PGSC0003DMG400004168|PGSC0003DMT400010675
>t0000023_19684	Score: 2.2	PGSC0003DMG400004168|PGSC0003DMT400010676
>t0000023_19684	Score: 2.2	PGSC0003DMG400004168|PGSC0003DMT400010677
>t0000023_19684	Score: 2.2	PGSC0003DMG400004168|PGSC0003DMT400010678
>t0000023_19684	Score: 2.5	PGSC0003DMG400007426|PGSC0003DMT400019198
>t0000023_19684	Score: 2.5	PGSC0003DMG400007426|PGSC0003DMT400019201
>t0000023_19684	Score: 2.5	PGSC0003DMG400007426|PGSC0003DMT400019199
>t0000023_19684	Score: 2.5	PGSC0003DMG400007426|PGSC0003DMT400019200
>t0000023_19684	Score: 2.0	PGSC0003DMG402028807|PGSC0003DMT400074114
>t0000023_19684	Score: 2.0	PGSC0003DMG402028807|PGSC0003DMT400074116
>t0000023_19684	Score: 2.0	PGSC0003DMG402028807|PGSC0003DMT400074115
>t0000023_19684	Score: 2.5	PGSC0003DMG400034334|PGSC0003DMT400084763
>t0000026_18781	Score: 2.5	PGSC0003DMG400006057|PGSC0003DMT400015516
>t0000026_18781	Score: 2.5	PGSC0003DMG401006174|PGSC0003DMT400015797
>t0000026_18781	Score: 2.5	PGSC0003DMG400006029|PGSC0003DMT400015444
>t0000026_18781	Score: 2.5	PGSC0003DMG400011541|PGSC0003DMT400030125
>t0000026_18781	Score: 2.5	PGSC0003DMG400008122|PGSC0003DMT400020977
>t0000026_18781	Score: 2.2	PGSC0003DMG400009174|PGSC0003DMT400023715
>t0000026_18781	Score: 2.5	PGSC0003DMG400008122|PGSC0003DMT400020978
>t0000026_18781	Score: 2.5	PGSC0003DMG400011541|PGSC0003DMT400030124
>t0000026_18781	Score: 2.5	PGSC0003DMG400015653|PGSC0003DMT400040434
>t0000026_18781	Score: 2.5	PGSC0003DMG400022169|PGSC0003DMT400057050
>t0000026_18781	Score: 2.5	PGSC0003DMG400015653|PGSC0003DMT400040433
>t0000026_18781	Score: 2.5	PGSC0003DMG400021472|PGSC0003DMT400055319
>t0000026_18781	Score: 2.5	PGSC0003DMG400022169|PGSC0003DMT400057049
>t0000026_18781	Score: 2.5	PGSC0003DMG402027531|PGSC0003DMT400070813
>t0000026_18781	Score: 2.5	PGSC0003DMG400030213|PGSC0003DMT400077649
>t0000026_18781	Score: 2.5	PGSC0003DMG402027531|PGSC0003DMT400070812
>t0000026_18781	Score: 2.5	PGSC0003DMG400030213|PGSC0003DMT400077650
>t0000026_18781	Score: 2.0	PGSC0003DMG400039917|PGSC0003DMT400090346
>t0000028_18463	Score: 2.5	EPlSTUG00000000330|EPlSTUT00000000330
>t0000028_18463	Score: 2.2	PGSC0003DMG402003815|PGSC0003DMT400009750
>t0000030_17370	Score: 2.5	PGSC0003DMG400001836|PGSC0003DMT400004633
>t0000030_17370	Score: 2.2	PGSC0003DMG401008816|PGSC0003DMT400022730
>t0000030_17370	Score: 2.5	PGSC0003DMG400010443|PGSC0003DMT400027076
>t0000030_17370	Score: 2.5	PGSC0003DMG400010443|PGSC0003DMT400027074
>t0000030_17370	Score: 1.5	PGSC0003DMG400008208|PGSC0003DMT400021198
>t0000030_17370	Score: 2.2	PGSC0003DMG400013896|PGSC0003DMT400036085
>t0000030_17370	Score: 2.2	PGSC0003DMG400023790|PGSC0003DMT400061145
>t0000030_17370	Score: 2.2	PGSC0003DMG400031863|PGSC0003DMT400081466
>t0000030_17370	Score: 2.2	PGSC0003DMG400031863|PGSC0003DMT400081467
>t0000030_17370	Score: 2.2	PGSC0003DMG400031863|PGSC0003DMT400081465
>t0000031_17015	Score: 2.2	PGSC0003DMG400004393|PGSC0003DMT400011218
>t0000031_17015	Score: 2.2	PGSC0003DMG400004396|PGSC0003DMT400011224
>t0000031_17015	Score: 2.5	PGSC0003DMG400010622|PGSC0003DMT400027553
>t0000031_17015	Score: 2.2	PGSC0003DMG400011070|PGSC0003DMT400028762
>t0000031_17015	Score: 2.5	PGSC0003DMG400012303|PGSC0003DMT400032056
>t0000031_17015	Score: 2.5	PGSC0003DMG400030523|PGSC0003DMT400078402
>t0000031_17015	Score: 2.5	PGSC0003DMG400028158|PGSC0003DMT400072352
>t0000031_17015	Score: 2.5	PGSC0003DMG400030051|PGSC0003DMT400077256
>t0000031_17015	Score: 2.5	PGSC0003DMG400028158|PGSC0003DMT400072353
>t0000031_17015	Score: 2.5	PGSC0003DMG400042579|PGSC0003DMT400093008
>t0000034_15199	Score: 2.0	PGSC0003DMG400003551|PGSC0003DMT400009133
>t0000034_15199	Score: 2.5	PGSC0003DMG400019106|PGSC0003DMT400049159
>t0000034_15199	Score: 2.5	PGSC0003DMG400019106|PGSC0003DMT400049158
>t0000034_15199	Score: 2.2	PGSC0003DMG400028078|PGSC0003DMT400072154
>t0000034_15199	Score: 2.2	PGSC0003DMG400028078|PGSC0003DMT400072151
>t0000034_15199	Score: 2.2	PGSC0003DMG400028078|PGSC0003DMT400072152
>t0000034_15199	Score: 2.5	PGSC0003DMG400030161|PGSC0003DMT400077564
>t0000034_15199	Score: 2.2	PGSC0003DMG400028078|PGSC0003DMT400072155
>t0000034_15199	Score: 2.2	PGSC0003DMG400028078|PGSC0003DMT400072153
>t0000037_15080	Score: 2.2	PGSC0003DMG400002786|PGSC0003DMT400007202
>t0000037_15080	Score: 2.5	PGSC0003DMG400014626|PGSC0003DMT400037916
>t0000037_15080	Score: 2.5	PGSC0003DMG400014626|PGSC0003DMT400037917
>t0000037_15080	Score: 2.5	PGSC0003DMG400014589|PGSC0003DMT400037814
>t0000037_15080	Score: 2.5	PGSC0003DMG400021214|PGSC0003DMT400054671
>t0000037_15080	Score: 2.5	PGSC0003DMG400021214|PGSC0003DMT400054670
>t0000037_15080	Score: 2.5	PGSC0003DMG400017150|PGSC0003DMT400044180
>t0000037_15080	Score: 2.5	PGSC0003DMG400029616|PGSC0003DMT400076170
>t0000037_15080	Score: 2.0	PGSC0003DMG400037246|PGSC0003DMT400087675
>t0000037_15080	Score: 2.0	PGSC0003DMG400036682|PGSC0003DMT400087111
>t0000038_14943	Score: 2.5	PGSC0003DMG400014784|PGSC0003DMT400038313
>t0000038_14943	Score: 2.5	PGSC0003DMG400009215|PGSC0003DMT400023814
>t0000038_14943	Score: 2.5	PGSC0003DMG400023513|PGSC0003DMT400060451
>t0000038_14943	Score: 2.5	PGSC0003DMG400021526|PGSC0003DMT400055446
>t0000038_14943	Score: 2.5	PGSC0003DMG400023513|PGSC0003DMT400060452
>t0000038_14943	Score: 2.5	PGSC0003DMG400023513|PGSC0003DMT400060450
>t0000038_14943	Score: 2.5	PGSC0003DMG400035515|PGSC0003DMT400085944
>t0000039_14692	Score: 2.5	PGSC0003DMG400031209|PGSC0003DMT400080175
>t0000040_14550	Score: 2.5	PGSC0003DMG400003967|PGSC0003DMT400010120
>t0000041_14483	Score: 2.0	PGSC0003DMG402003567|PGSC0003DMT400009194
>t0000041_14483	Score: 2.5	PGSC0003DMG400010841|PGSC0003DMT400028109
>t0000041_14483	Score: 2.5	PGSC0003DMG400012218|PGSC0003DMT400031856
>t0000041_14483	Score: 2.5	PGSC0003DMG400016821|PGSC0003DMT400043325
>t0000041_14483	Score: 2.5	PGSC0003DMG401017656|PGSC0003DMT400045511
>t0000041_14483	Score: 2.0	PGSC0003DMG400024951|PGSC0003DMT400064220
>t0000041_14483	Score: 2.0	PGSC0003DMG400024951|PGSC0003DMT400064219
>t0000041_14483	Score: 2.0	PGSC0003DMG400024951|PGSC0003DMT400064221
>t0000041_14483	Score: 2.5	PGSC0003DMG400044591|PGSC0003DMT400095020
>t0000041_14483	Score: 2.5	PGSC0003DMG400035194|PGSC0003DMT400085623
>t0000042_14425	Score: 2.5	PGSC0003DMG400000516|PGSC0003DMT400001388
>t0000042_14425	Score: 2.5	PGSC0003DMG400000516|PGSC0003DMT400001389
>t0000042_14425	Score: 2.5	PGSC0003DMG400006644|PGSC0003DMT400017006
>t0000042_14425	Score: 2.2	PGSC0003DMG400012201|PGSC0003DMT400031803
>t0000042_14425	Score: 2.2	PGSC0003DMG400029414|PGSC0003DMT400075620
>t0000042_14425	Score: 1.8	PGSC0003DMG400028591|PGSC0003DMT400073599
>t0000042_14425	Score: 2.5	PGSC0003DMG400039571|PGSC0003DMT400090000
>t0000045_14151	Score: 2.2	PGSC0003DMG400013258|PGSC0003DMT400034494
>t0000045_14151	Score: 2.2	PGSC0003DMG400013258|PGSC0003DMT400034492
>t0000045_14151	Score: 2.2	PGSC0003DMG400013258|PGSC0003DMT400034493
>t0000045_14151	Score: 2.0	PGSC0003DMG400029384|PGSC0003DMT400075563
>t0000053_12180	Score: 2.5	PGSC0003DMG400006119|PGSC0003DMT400015670
>t0000053_12180	Score: 2.2	PGSC0003DMG400014305|PGSC0003DMT400037111
>t0000053_12180	Score: 2.0	PGSC0003DMG400018866|PGSC0003DMT400048565
>t0000054_12150	Score: 1.8	PGSC0003DMG400003697|PGSC0003DMT400009483
>t0000054_12150	Score: 2.5	PGSC0003DMG400024852|PGSC0003DMT400063942
>t0000055_11738	Score: 2.5	PGSC0003DMG402004392|PGSC0003DMT400011217
>t0000055_11738	Score: 2.5	PGSC0003DMG400022986|PGSC0003DMT400059178
>t0000055_11738	Score: 2.5	PGSC0003DMG400021922|PGSC0003DMT400056413
>t0000055_11738	Score: 2.5	PGSC0003DMG400022986|PGSC0003DMT400059176
>t0000055_11738	Score: 2.5	PGSC0003DMG400020937|PGSC0003DMT400053964
>t0000055_11738	Score: 2.5	PGSC0003DMG400022986|PGSC0003DMT400059177
>t0000055_11738	Score: 2.5	PGSC0003DMG400027335|PGSC0003DMT400070306
>t0000055_11738	Score: 2.5	PGSC0003DMG400031248|PGSC0003DMT400080270
>t0000055_11738	Score: 2.5	PGSC0003DMG400027335|PGSC0003DMT400070305
>t0000057_11454	Score: 2.2	PGSC0003DMG400010499|PGSC0003DMT400027234
>t0000057_11454	Score: 1.8	PGSC0003DMG400013599|PGSC0003DMT400035387
>t0000057_11454	Score: 2.2	PGSC0003DMG400010701|PGSC0003DMT400027799
>t0000057_11454	Score: 2.2	PGSC0003DMG400030291|PGSC0003DMT400077864
>t0000057_11454	Score: 2.2	PGSC0003DMG400031485|PGSC0003DMT400080853
>t0000057_11454	Score: 2.5	PGSC0003DMG400041447|PGSC0003DMT400091876
>t0000059_11385	Score: 2.0	PGSC0003DMG400026809|PGSC0003DMT400068926
>t0000060_11187	Score: 2.5	PGSC0003DMG400001598|PGSC0003DMT400004046
>t0000060_11187	Score: 2.2	PGSC0003DMG402009818|PGSC0003DMT400025438
>t0000060_11187	Score: 2.5	PGSC0003DMG400012611|PGSC0003DMT400032839
>t0000060_11187	Score: 2.5	PGSC0003DMG400010924|PGSC0003DMT400028338
>t0000060_11187	Score: 2.2	PGSC0003DMG401009818|PGSC0003DMT400025433
>t0000060_11187	Score: 2.5	PGSC0003DMG400007546|PGSC0003DMT400019523
>t0000060_11187	Score: 2.2	PGSC0003DMG402009818|PGSC0003DMT400025439
>t0000060_11187	Score: 2.2	PGSC0003DMG402009818|PGSC0003DMT400025437
>t0000060_11187	Score: 2.5	PGSC0003DMG400010438|PGSC0003DMT400027062
>t0000060_11187	Score: 2.2	PGSC0003DMG401009818|PGSC0003DMT400025432
>t0000060_11187	Score: 2.5	PGSC0003DMG400010043|PGSC0003DMT400026030
>t0000060_11187	Score: 2.2	PGSC0003DMG402009818|PGSC0003DMT400025436
>t0000060_11187	Score: 2.5	PGSC0003DMG400022785|PGSC0003DMT400058648
>t0000060_11187	Score: 2.0	PGSC0003DMG400022394|PGSC0003DMT400057680
>t0000060_11187	Score: 2.5	PGSC0003DMG400018638|PGSC0003DMT400047958
>t0000060_11187	Score: 2.5	PGSC0003DMG401023772|PGSC0003DMT400061097
>t0000060_11187	Score: 2.5	PGSC0003DMG400030625|PGSC0003DMT400078705
>t0000060_11187	Score: 2.5	PGSC0003DMG401030716|PGSC0003DMT400078936
>t0000060_11187	Score: 2.5	PGSC0003DMG401023772|PGSC0003DMT400061096
>t0000060_11187	Score: 2.5	PGSC0003DMG400030434|PGSC0003DMT400078210
>t0000060_11187	Score: 2.5	PGSC0003DMG400030434|PGSC0003DMT400078212
>t0000060_11187	Score: 2.2	PGSC0003DMG400044760|PGSC0003DMT400095189
>t0000060_11187	Score: 2.2	PGSC0003DMG400032508|PGSC0003DMT400082383
>t0000060_11187	Score: 2.2	PGSC0003DMG400032508|PGSC0003DMT400082382
>t0000063_10940	Score: 2.5	PGSC0003DMG400001876|PGSC0003DMT400004735
>t0000063_10940	Score: 2.5	PGSC0003DMG400012891|PGSC0003DMT400033569
>t0000063_10940	Score: 2.5	PGSC0003DMG400017216|PGSC0003DMT400044335
>t0000063_10940	Score: 2.5	PGSC0003DMG400025794|PGSC0003DMT400066332
>t0000063_10940	Score: 2.5	PGSC0003DMG400025794|PGSC0003DMT400066334
>t0000063_10940	Score: 2.5	PGSC0003DMG400025794|PGSC0003DMT400066333
>t0000064_10765	Score: 2.2	PGSC0003DMG400013332|PGSC0003DMT400034695
>t0000064_10765	Score: 2.2	PGSC0003DMG400040387|PGSC0003DMT400090816
>t0000065_10330	Score: 2.2	EPlSTUG00000001560|EPlSTUT00000001560
>t0000065_10330	Score: 2.5	PGSC0003DMG402003567|PGSC0003DMT400009194
>t0000065_10330	Score: 2.2	PGSC0003DMG400012218|PGSC0003DMT400031856
>t0000065_10330	Score: 2.0	PGSC0003DMG400016821|PGSC0003DMT400043325
>t0000065_10330	Score: 2.0	PGSC0003DMG401017656|PGSC0003DMT400045511
>t0000065_10330	Score: 2.5	PGSC0003DMG400019623|PGSC0003DMT400050493
>t0000065_10330	Score: 1.5	PGSC0003DMG400024951|PGSC0003DMT400064220
>t0000065_10330	Score: 2.2	PGSC0003DMG401029058|PGSC0003DMT400074729
>t0000065_10330	Score: 1.5	PGSC0003DMG400024951|PGSC0003DMT400064219
>t0000065_10330	Score: 2.2	PGSC0003DMG401029058|PGSC0003DMT400074727
>t0000065_10330	Score: 1.5	PGSC0003DMG400024951|PGSC0003DMT400064221
>t0000065_10330	Score: 2.5	PGSC0003DMG400031800|PGSC0003DMT400081337
>t0000065_10330	Score: 2.5	PGSC0003DMG400035194|PGSC0003DMT400085623
>t0000066_10172	Score: 2.0	EPlSTUG00000000569|EPlSTUT00000000569
>t0000066_10172	Score: 1.5	PGSC0003DMG400000949|PGSC0003DMT400002491
>t0000066_10172	Score: 2.5	PGSC0003DMG400000823|PGSC0003DMT400002153
>t0000066_10172	Score: 1.5	PGSC0003DMG400000949|PGSC0003DMT400002492
>t0000066_10172	Score: 2.5	PGSC0003DMG400001400|PGSC0003DMT400003546
>t0000066_10172	Score: 2.5	PGSC0003DMG400001967|PGSC0003DMT400004973
>t0000066_10172	Score: 2.5	PGSC0003DMG400002014|PGSC0003DMT400005086
>t0000066_10172	Score: 2.5	PGSC0003DMG400001967|PGSC0003DMT400004971
>t0000066_10172	Score: 2.5	PGSC0003DMG400006410|PGSC0003DMT400016404
>t0000066_10172	Score: 1.8	PGSC0003DMG400003629|PGSC0003DMT400009339
>t0000066_10172	Score: 2.5	PGSC0003DMG400007131|PGSC0003DMT400018367
>t0000066_10172	Score: 2.5	PGSC0003DMG400007131|PGSC0003DMT400018366
>t0000066_10172	Score: 2.2	PGSC0003DMG402006188|PGSC0003DMT400015833
>t0000066_10172	Score: 2.5	PGSC0003DMG400008877|PGSC0003DMT400022903
>t0000066_10172	Score: 2.2	PGSC0003DMG400011359|PGSC0003DMT400029528
>t0000066_10172	Score: 2.2	PGSC0003DMG400007832|PGSC0003DMT400020258
>t0000066_10172	Score: 1.8	PGSC0003DMG400011071|PGSC0003DMT400028763
>t0000066_10172	Score: 2.2	PGSC0003DMG400011941|PGSC0003DMT400031178
>t0000066_10172	Score: 2.5	PGSC0003DMG400009982|PGSC0003DMT400025850
>t0000066_10172	Score: 2.5	PGSC0003DMG400012169|PGSC0003DMT400031718
>t0000066_10172	Score: 2.5	PGSC0003DMG400012304|PGSC0003DMT400032057
>t0000066_10172	Score: 2.5	PGSC0003DMG402015009|PGSC0003DMT400038843
>t0000066_10172	Score: 2.5	PGSC0003DMG400009418|PGSC0003DMT400024354
>t0000066_10172	Score: 2.5	PGSC0003DMG400014838|PGSC0003DMT400038440
>t0000066_10172	Score: 2.2	PGSC0003DMG400008128|PGSC0003DMT400020987
>t0000066_10172	Score: 2.2	PGSC0003DMG400011359|PGSC0003DMT400029527
>t0000066_10172	Score: 2.2	PGSC0003DMG400007832|PGSC0003DMT400020259
>t0000066_10172	Score: 2.5	PGSC0003DMG400016236|PGSC0003DMT400041844
>t0000066_10172	Score: 2.5	PGSC0003DMG400019689|PGSC0003DMT400050707
>t0000066_10172	Score: 2.5	PGSC0003DMG400016854|PGSC0003DMT400043416
>t0000066_10172	Score: 2.0	PGSC0003DMG400019081|PGSC0003DMT400049088
>t0000066_10172	Score: 2.2	PGSC0003DMG400020056|PGSC0003DMT400051646
>t0000066_10172	Score: 1.5	PGSC0003DMG400023473|PGSC0003DMT400060346
>t0000066_10172	Score: 2.5	PGSC0003DMG400022409|PGSC0003DMT400057721
>t0000066_10172	Score: 2.5	PGSC0003DMG400020691|PGSC0003DMT400053314
>t0000066_10172	Score: 2.5	PGSC0003DMG400020842|PGSC0003DMT400053726
>t0000066_10172	Score: 2.5	PGSC0003DMG400019689|PGSC0003DMT400050704
>t0000066_10172	Score: 1.5	PGSC0003DMG400023473|PGSC0003DMT400060344
>t0000066_10172	Score: 2.5	PGSC0003DMG400015513|PGSC0003DMT400040100
>t0000066_10172	Score: 2.5	PGSC0003DMG400020842|PGSC0003DMT400053727
>t0000066_10172	Score: 2.2	PGSC0003DMG400019687|PGSC0003DMT400050688
>t0000066_10172	Score: 2.5	PGSC0003DMG400020534|PGSC0003DMT400052927
>t0000066_10172	Score: 2.5	PGSC0003DMG400022860|PGSC0003DMT400058832
>t0000066_10172	Score: 2.0	PGSC0003DMG400019081|PGSC0003DMT400049089
>t0000066_10172	Score: 2.5	PGSC0003DMG400018939|PGSC0003DMT400048730
>t0000066_10172	Score: 2.5	PGSC0003DMG400018485|PGSC0003DMT400047571
>t0000066_10172	Score: 2.5	PGSC0003DMG400016854|PGSC0003DMT400043415
>t0000066_10172	Score: 2.2	PGSC0003DMG400020864|PGSC0003DMT400053778
>t0000066_10172	Score: 1.5	PGSC0003DMG400023473|PGSC0003DMT400060345
>t0000066_10172	Score: 2.0	PGSC0003DMG400019081|PGSC0003DMT400049087
>t0000066_10172	Score: 2.5	PGSC0003DMG400020549|PGSC0003DMT400052957
>t0000066_10172	Score: 1.5	PGSC0003DMG400023473|PGSC0003DMT400060343
>t0000066_10172	Score: 2.5	PGSC0003DMG400019689|PGSC0003DMT400050703
>t0000066_10172	Score: 2.5	PGSC0003DMG400024844|PGSC0003DMT400063924
>t0000066_10172	Score: 2.2	PGSC0003DMG400030079|PGSC0003DMT400077337
>t0000066_10172	Score: 2.2	PGSC0003DMG400025955|PGSC0003DMT400066760
>t0000066_10172	Score: 2.5	PGSC0003DMG400024057|PGSC0003DMT400061837
>t0000066_10172	Score: 2.5	PGSC0003DMG400027868|PGSC0003DMT400071640
>t0000066_10172	Score: 2.5	PGSC0003DMG402030895|PGSC0003DMT400079374
>t0000066_10172	Score: 2.5	PGSC0003DMG400024057|PGSC0003DMT400061836
>t0000066_10172	Score: 1.8	PGSC0003DMG402030493|PGSC0003DMT400078328
>t0000066_10172	Score: 2.0	PGSC0003DMG400023881|PGSC0003DMT400061368
>t0000066_10172	Score: 2.5	PGSC0003DMG400031103|PGSC0003DMT400079864
>t0000066_10172	Score: 2.0	PGSC0003DMG402027016|PGSC0003DMT400069495
>t0000066_10172	Score: 2.5	PGSC0003DMG400025404|PGSC0003DMT400065360
>t0000066_10172	Score: 2.5	PGSC0003DMG400029178|PGSC0003DMT400075020
>t0000066_10172	Score: 2.5	PGSC0003DMG400034375|PGSC0003DMT400084804
>t0000066_10172	Score: 2.5	PGSC0003DMG400035252|PGSC0003DMT400085681
>t0000066_10172	Score: 2.2	PGSC0003DMG400032839|PGSC0003DMT400082827
>t0000067_10154	Score: 2.0	PGSC0003DMG400005328|PGSC0003DMT400013629
>t0000067_10154	Score: 2.2	PGSC0003DMG402015590|PGSC0003DMT400040274
>t0000067_10154	Score: 2.5	PGSC0003DMG400023576|PGSC0003DMT400060612
>t0000067_10154	Score: 2.5	PGSC0003DMG400023576|PGSC0003DMT400060610
>t0000067_10154	Score: 2.5	PGSC0003DMG400023576|PGSC0003DMT400060613
>t0000067_10154	Score: 2.5	PGSC0003DMG400023576|PGSC0003DMT400060611
>t0000067_10154	Score: 2.2	PGSC0003DMG400015592|PGSC0003DMT400040277
>t0000067_10154	Score: 2.2	PGSC0003DMG400015593|PGSC0003DMT400040282
>t0000067_10154	Score: 2.5	PGSC0003DMG400028662|PGSC0003DMT400073776
>t0000067_10154	Score: 2.5	PGSC0003DMG401030531|PGSC0003DMT400078428
>t0000067_10154	Score: 2.5	PGSC0003DMG400028662|PGSC0003DMT400073779
>t0000067_10154	Score: 2.5	PGSC0003DMG400044152|PGSC0003DMT400094581
>t0000069_9841	Score: 2.5	PGSC0003DMG400019091|PGSC0003DMT400049122
>t0000069_9841	Score: 2.5	PGSC0003DMG401019681|PGSC0003DMT400050673
>t0000069_9841	Score: 2.5	PGSC0003DMG400019091|PGSC0003DMT400049123
>t0000069_9841	Score: 2.5	PGSC0003DMG402019681|PGSC0003DMT400050671
>t0000070_9836	Score: 2.5	PGSC0003DMG400006804|PGSC0003DMT400017547
>t0000070_9836	Score: 2.5	PGSC0003DMG400023230|PGSC0003DMT400059741
>t0000070_9836	Score: 2.5	PGSC0003DMG400030445|PGSC0003DMT400078234
>t0000072_9790	Score: 2.5	PGSC0003DMG401001383|PGSC0003DMT400003501
>t0000072_9790	Score: 2.5	PGSC0003DMG400033060|PGSC0003DMT400083115
>t0000072_9790	Score: 2.5	PGSC0003DMG400033060|PGSC0003DMT400083114
>t0000073_9713	Score: 2.2	PGSC0003DMG400010680|PGSC0003DMT400027717
>t0000073_9713	Score: 2.5	PGSC0003DMG400020061|PGSC0003DMT400051661
>t0000075_9600	Score: 1.8	PGSC0003DMG400023555|PGSC0003DMT400060552
>t0000075_9600	Score: 2.5	PGSC0003DMG400027361|PGSC0003DMT400070375
>t0000075_9600	Score: 2.2	PGSC0003DMG400024073|PGSC0003DMT400061869
>t0000075_9600	Score: 2.2	PGSC0003DMG400024073|PGSC0003DMT400061867
>t0000075_9600	Score: 2.5	PGSC0003DMG400027361|PGSC0003DMT400070374
>t0000075_9600	Score: 1.8	PGSC0003DMG400026917|PGSC0003DMT400069200
>t0000075_9600	Score: 2.5	PGSC0003DMG400044607|PGSC0003DMT400095036
>t0000076_9594	Score: 2.2	PGSC0003DMG400000892|PGSC0003DMT400002337
>t0000076_9594	Score: 2.5	PGSC0003DMG400000330|PGSC0003DMT400000871
>t0000076_9594	Score: 2.2	PGSC0003DMG400000892|PGSC0003DMT400002336
>t0000076_9594	Score: 2.5	PGSC0003DMG400004769|PGSC0003DMT400012165
>t0000076_9594	Score: 2.2	PGSC0003DMG400026384|PGSC0003DMT400067834
>t0000076_9594	Score: 2.0	PGSC0003DMG400025227|PGSC0003DMT400064957
>t0000076_9594	Score: 2.0	PGSC0003DMG400025227|PGSC0003DMT400064958
>t0000076_9594	Score: 2.2	PGSC0003DMG400026384|PGSC0003DMT400067833
>t0000076_9594	Score: 2.0	PGSC0003DMG400025227|PGSC0003DMT400064954
>t0000076_9594	Score: 2.2	PGSC0003DMG400026384|PGSC0003DMT400067835
>t0000076_9594	Score: 2.0	PGSC0003DMG400025227|PGSC0003DMT400064956
>t0000076_9594	Score: 2.0	PGSC0003DMG400036426|PGSC0003DMT400086855
>t0000077_9434	Score: 2.2	PGSC0003DMG400006790|PGSC0003DMT400017478
>t0000077_9434	Score: 2.5	PGSC0003DMG400018423|PGSC0003DMT400047404
>t0000079_9289	Score: 2.5	PGSC0003DMG400006222|PGSC0003DMT400015915
>t0000079_9289	Score: 2.5	PGSC0003DMG400009824|PGSC0003DMT400025451
>t0000079_9289	Score: 2.2	PGSC0003DMG400012859|PGSC0003DMT400033476
>t0000079_9289	Score: 2.0	PGSC0003DMG400012994|PGSC0003DMT400033819
>t0000082_9126	Score: 2.5	PGSC0003DMG400015352|PGSC0003DMT400039723
>t0000082_9126	Score: 2.0	PGSC0003DMG400010559|PGSC0003DMT400027382
>t0000082_9126	Score: 2.5	PGSC0003DMG400011324|PGSC0003DMT400029448
>t0000082_9126	Score: 2.5	PGSC0003DMG400011324|PGSC0003DMT400029449
>t0000082_9126	Score: 2.0	PGSC0003DMG401012812|PGSC0003DMT400033353
>t0000082_9126	Score: 2.5	PGSC0003DMG400018196|PGSC0003DMT400046854
>t0000082_9126	Score: 2.5	PGSC0003DMG400018131|PGSC0003DMT400046700
>t0000082_9126	Score: 2.5	PGSC0003DMG400043777|PGSC0003DMT400094206
>t0000083_8961	Score: 2.5	PGSC0003DMG400003164|PGSC0003DMT400008206
>t0000085_8806	Score: 2.5	PGSC0003DMG400020718|PGSC0003DMT400053402
>t0000085_8806	Score: 2.5	PGSC0003DMG400024567|PGSC0003DMT400063163
>t0000087_8612	Score: 2.5	PGSC0003DMG401002683|PGSC0003DMT400006922
>t0000087_8612	Score: 2.5	PGSC0003DMG401002683|PGSC0003DMT400006923
>t0000087_8612	Score: 2.5	PGSC0003DMG401002683|PGSC0003DMT400006917
>t0000087_8612	Score: 2.5	PGSC0003DMG401002683|PGSC0003DMT400006919
>t0000087_8612	Score: 2.5	PGSC0003DMG401002683|PGSC0003DMT400006921
>t0000087_8612	Score: 2.5	PGSC0003DMG401002683|PGSC0003DMT400006920
>t0000087_8612	Score: 2.5	PGSC0003DMG400013736|PGSC0003DMT400035715
>t0000087_8612	Score: 2.5	PGSC0003DMG400013736|PGSC0003DMT400035714
>t0000087_8612	Score: 2.5	PGSC0003DMG400024665|PGSC0003DMT400063408
>t0000087_8612	Score: 2.5	PGSC0003DMG400027335|PGSC0003DMT400070306
>t0000087_8612	Score: 2.5	PGSC0003DMG400027335|PGSC0003DMT400070305
>t0000087_8612	Score: 2.5	PGSC0003DMG400028867|PGSC0003DMT400074277
>t0000090_8346	Score: 2.5	PGSC0003DMG402004779|PGSC0003DMT400012194
>t0000090_8346	Score: 2.5	PGSC0003DMG401004779|PGSC0003DMT400012195
>t0000091_8316	Score: 2.5	PGSC0003DMG400000241|PGSC0003DMT400000678
>t0000091_8316	Score: 2.5	PGSC0003DMG400013569|PGSC0003DMT400035316
>t0000091_8316	Score: 2.0	PGSC0003DMG400009927|PGSC0003DMT400025711
>t0000091_8316	Score: 2.5	PGSC0003DMG400012611|PGSC0003DMT400032839
>t0000091_8316	Score: 2.5	PGSC0003DMG400010438|PGSC0003DMT400027062
>t0000091_8316	Score: 2.0	PGSC0003DMG400022394|PGSC0003DMT400057680
>t0000091_8316	Score: 2.5	PGSC0003DMG400028393|PGSC0003DMT400073002
>t0000091_8316	Score: 2.2	PGSC0003DMG400037246|PGSC0003DMT400087675
>t0000091_8316	Score: 2.2	PGSC0003DMG400032508|PGSC0003DMT400082383
>t0000091_8316	Score: 2.2	PGSC0003DMG400032508|PGSC0003DMT400082382
>t0000092_8245	Score: 2.5	PGSC0003DMG402003570|PGSC0003DMT400009200
>t0000092_8245	Score: 2.5	PGSC0003DMG400028443|PGSC0003DMT400073140
>t0000092_8245	Score: 2.5	PGSC0003DMG400028443|PGSC0003DMT400073139
>t0000092_8245	Score: 2.5	PGSC0003DMG400027399|PGSC0003DMT400070472
>t0000092_8245	Score: 2.5	PGSC0003DMG400027399|PGSC0003DMT400070473
>t0000093_8235	Score: 1.8	PGSC0003DMG400000434|PGSC0003DMT400001153
>t0000093_8235	Score: 1.8	PGSC0003DMG400000434|PGSC0003DMT400001154
>t0000093_8235	Score: 2.0	PGSC0003DMG402006496|PGSC0003DMT400016624
>t0000093_8235	Score: 1.8	PGSC0003DMG400005622|PGSC0003DMT400014328
>t0000093_8235	Score: 2.5	PGSC0003DMG400022468|PGSC0003DMT400057860
>t0000093_8235	Score: 2.5	PGSC0003DMG400029282|PGSC0003DMT400075285
>t0000093_8235	Score: 2.5	PGSC0003DMG400031399|PGSC0003DMT400080635
>t0000093_8235	Score: 2.5	PGSC0003DMG400029282|PGSC0003DMT400075288
>t0000093_8235	Score: 2.5	PGSC0003DMG400029282|PGSC0003DMT400075286
>t0000093_8235	Score: 2.5	PGSC0003DMG400029282|PGSC0003DMT400075289
>t0000093_8235	Score: 2.5	PGSC0003DMG400031399|PGSC0003DMT400080638
>t0000093_8235	Score: 2.5	PGSC0003DMG400032136|PGSC0003DMT400081848
>t0000093_8235	Score: 2.0	PGSC0003DMG400044401|PGSC0003DMT400094830
>t0000093_8235	Score: 2.5	PGSC0003DMG400032136|PGSC0003DMT400081849
>t0000095_8089	Score: 2.5	PGSC0003DMG400005643|PGSC0003DMT400014388
>t0000095_8089	Score: 2.5	PGSC0003DMG400005643|PGSC0003DMT400014387
>t0000095_8089	Score: 2.5	PGSC0003DMG400005643|PGSC0003DMT400014389
>t0000095_8089	Score: 1.8	PGSC0003DMG400028635|PGSC0003DMT400073715
>t0000095_8089	Score: 1.8	PGSC0003DMG400028635|PGSC0003DMT400073714
>t0000095_8089	Score: 2.5	PGSC0003DMG400036018|PGSC0003DMT400086447
>t0000096_8087	Score: 2.2	PGSC0003DMG400005328|PGSC0003DMT400013629
>t0000096_8087	Score: 2.5	PGSC0003DMG400016586|PGSC0003DMT400042733
>t0000096_8087	Score: 2.2	PGSC0003DMG400027414|PGSC0003DMT400070538
>t0000096_8087	Score: 2.5	PGSC0003DMG400025282|PGSC0003DMT400065067
>t0000096_8087	Score: 2.5	PGSC0003DMG400024062|PGSC0003DMT400061843
>t0000096_8087	Score: 2.5	PGSC0003DMG400044152|PGSC0003DMT400094581
>t0000097_8066	Score: 2.5	PGSC0003DMG400005039|PGSC0003DMT400012932
>t0000097_8066	Score: 2.5	PGSC0003DMG400005039|PGSC0003DMT400012931
>t0000097_8066	Score: 2.5	PGSC0003DMG400007175|PGSC0003DMT400018486
>t0000097_8066	Score: 2.0	PGSC0003DMG400010778|PGSC0003DMT400027971
>t0000097_8066	Score: 2.0	PGSC0003DMG400010778|PGSC0003DMT400027972
>t0000097_8066	Score: 2.2	PGSC0003DMG400022634|PGSC0003DMT400058294
>t0000097_8066	Score: 2.2	PGSC0003DMG400022634|PGSC0003DMT400058293
>t0000097_8066	Score: 2.5	PGSC0003DMG400033695|PGSC0003DMT400083994
>t0000097_8066	Score: 2.5	PGSC0003DMG400046546|PGSC0003DMT400096975
>t0000098_8030	Score: 2.5	PGSC0003DMG400001866|PGSC0003DMT400004719
>t0000098_8030	Score: 2.5	PGSC0003DMG400001866|PGSC0003DMT400004720
>t0000098_8030	Score: 2.5	PGSC0003DMG400001866|PGSC0003DMT400004721
>t0000098_8030	Score: 2.5	PGSC0003DMG400001854|PGSC0003DMT400004684
>t0000098_8030	Score: 2.5	PGSC0003DMG401001493|PGSC0003DMT400003769
>t0000098_8030	Score: 1.8	PGSC0003DMG400013717|PGSC0003DMT400035659
>t0000098_8030	Score: 1.8	PGSC0003DMG400011815|PGSC0003DMT400030841
>t0000098_8030	Score: 1.8	PGSC0003DMG400011815|PGSC0003DMT400030842
>t0000098_8030	Score: 1.8	PGSC0003DMG400013717|PGSC0003DMT400035658
>t0000098_8030	Score: 1.8	PGSC0003DMG400013717|PGSC0003DMT400035657
>t0000098_8030	Score: 2.2	PGSC0003DMG400021553|PGSC0003DMT400055510
>t0000098_8030	Score: 2.2	PGSC0003DMG400015790|PGSC0003DMT400040841
>t0000098_8030	Score: 2.2	PGSC0003DMG400015790|PGSC0003DMT400040839
>t0000098_8030	Score: 2.5	PGSC0003DMG402015527|PGSC0003DMT400040127
>t0000098_8030	Score: 2.2	PGSC0003DMG400015790|PGSC0003DMT400040838
>t0000098_8030	Score: 2.5	PGSC0003DMG402015527|PGSC0003DMT400040128
>t0000098_8030	Score: 2.2	PGSC0003DMG400021553|PGSC0003DMT400055506
>t0000098_8030	Score: 2.2	PGSC0003DMG400015790|PGSC0003DMT400040840
>t0000098_8030	Score: 1.5	PGSC0003DMG400020066|PGSC0003DMT400051673
>t0000098_8030	Score: 2.5	PGSC0003DMG402015527|PGSC0003DMT400040126
>t0000098_8030	Score: 2.5	PGSC0003DMG402024742|PGSC0003DMT400063658
>t0000099_8027	Score: 2.5	PGSC0003DMG401001235|PGSC0003DMT400003104
>t0000099_8027	Score: 2.0	PGSC0003DMG400016253|PGSC0003DMT400041887
>t0000099_8027	Score: 2.2	PGSC0003DMG400030476|PGSC0003DMT400078301
>t0000100_8026	Score: 2.0	PGSC0003DMG400020333|PGSC0003DMT400052379
>t0000100_8026	Score: 2.5	PGSC0003DMG400019729|PGSC0003DMT400050793
>t0000100_8026	Score: 2.5	PGSC0003DMG400019729|PGSC0003DMT400050792
>t0000100_8026	Score: 2.0	PGSC0003DMG400020333|PGSC0003DMT400052380
>t0000102_7916	Score: 2.2	PGSC0003DMG400025266|PGSC0003DMT400065034
>t0000104_7840	Score: 2.5	PGSC0003DMG400004070|PGSC0003DMT400010420
>t0000104_7840	Score: 2.5	PGSC0003DMG400004070|PGSC0003DMT400010421
>t0000104_7840	Score: 2.2	PGSC0003DMG400011517|PGSC0003DMT400030010
>t0000104_7840	Score: 2.2	PGSC0003DMG401011526|PGSC0003DMT400030039
>t0000104_7840	Score: 2.5	PGSC0003DMG400011523|PGSC0003DMT400030030
>t0000104_7840	Score: 2.2	PGSC0003DMG400011517|PGSC0003DMT400030011
>t0000104_7840	Score: 2.5	PGSC0003DMG400011525|PGSC0003DMT400030034
>t0000104_7840	Score: 2.2	PGSC0003DMG400011527|PGSC0003DMT400030042
>t0000104_7840	Score: 2.2	PGSC0003DMG400018648|PGSC0003DMT400047998
>t0000104_7840	Score: 2.2	PGSC0003DMG400018648|PGSC0003DMT400047996
>t0000104_7840	Score: 2.2	PGSC0003DMG400018648|PGSC0003DMT400047997
>t0000104_7840	Score: 2.5	PGSC0003DMG400033029|PGSC0003DMT400083031
>t0000104_7840	Score: 2.5	PGSC0003DMG400033029|PGSC0003DMT400083027
>t0000104_7840	Score: 2.5	PGSC0003DMG400033029|PGSC0003DMT400083030
>t0000104_7840	Score: 2.5	PGSC0003DMG400032582|PGSC0003DMT400082505
>t0000104_7840	Score: 2.5	PGSC0003DMG400033029|PGSC0003DMT400083028
>t0000104_7840	Score: 2.2	PGSC0003DMG400032584|PGSC0003DMT400082507
>t0000105_7785	Score: 2.5	PGSC0003DMG400019201|PGSC0003DMT400049422
>t0000105_7785	Score: 2.5	PGSC0003DMG400020416|PGSC0003DMT400052597
>t0000105_7785	Score: 2.2	PGSC0003DMG400022873|PGSC0003DMT400058874
>t0000109_7450	Score: 2.5	PGSC0003DMG400016157|PGSC0003DMT400041674
>t0000109_7450	Score: 2.5	PGSC0003DMG400022094|PGSC0003DMT400056811
>t0000109_7450	Score: 2.5	PGSC0003DMG400022094|PGSC0003DMT400056811
>t0000109_7450	Score: 2.5	PGSC0003DMG400019117|PGSC0003DMT400049181
>t0000109_7450	Score: 2.5	PGSC0003DMG400030243|PGSC0003DMT400077743
>t0000113_7381	Score: 2.2	PGSC0003DMG400022845|PGSC0003DMT400058793
>t0000113_7381	Score: 2.2	PGSC0003DMG402030235|PGSC0003DMT400077717
>t0000113_7381	Score: 1.8	PGSC0003DMG400026516|PGSC0003DMT400068180
>t0000113_7381	Score: 2.5	PGSC0003DMG400029220|PGSC0003DMT400075120
>t0000113_7381	Score: 2.5	PGSC0003DMG400024550|PGSC0003DMT400063111
>t0000113_7381	Score: 2.2	PGSC0003DMG402030236|PGSC0003DMT400077723
>t0000114_7237	Score: 2.2	PGSC0003DMG400014787|PGSC0003DMT400038321
>t0000114_7237	Score: 2.2	PGSC0003DMG400014440|PGSC0003DMT400037421
>t0000114_7237	Score: 2.2	PGSC0003DMG400014787|PGSC0003DMT400038319
>t0000114_7237	Score: 2.2	PGSC0003DMG400014440|PGSC0003DMT400037420
>t0000114_7237	Score: 2.2	PGSC0003DMG400014787|PGSC0003DMT400038322
>t0000114_7237	Score: 2.2	PGSC0003DMG400014787|PGSC0003DMT400038320
>t0000114_7237	Score: 2.2	PGSC0003DMG400014440|PGSC0003DMT400037417
>t0000114_7237	Score: 2.5	PGSC0003DMG401021671|PGSC0003DMT400055799
>t0000114_7237	Score: 2.5	PGSC0003DMG400022394|PGSC0003DMT400057680
>t0000114_7237	Score: 2.5	PGSC0003DMG400022750|PGSC0003DMT400058564
>t0000114_7237	Score: 2.5	PGSC0003DMG400017008|PGSC0003DMT400043828
>t0000114_7237	Score: 2.5	PGSC0003DMG400024764|PGSC0003DMT400063717
>t0000114_7237	Score: 2.5	PGSC0003DMG400024764|PGSC0003DMT400063716
>t0000114_7237	Score: 2.5	PGSC0003DMG400029616|PGSC0003DMT400076170
>t0000114_7237	Score: 2.5	PGSC0003DMG400029584|PGSC0003DMT400076080
>t0000114_7237	Score: 2.5	PGSC0003DMG400024764|PGSC0003DMT400063715
>t0000114_7237	Score: 2.0	PGSC0003DMG400037246|PGSC0003DMT400087675
>t0000114_7237	Score: 2.5	PGSC0003DMG400036682|PGSC0003DMT400087111
>t0000116_7215	Score: 2.0	PGSC0003DMG402011138|PGSC0003DMT400028929
>t0000116_7215	Score: 2.0	PGSC0003DMG402011138|PGSC0003DMT400028928
>t0000116_7215	Score: 2.0	PGSC0003DMG402011138|PGSC0003DMT400028930
>t0000116_7215	Score: 2.5	PGSC0003DMG400023662|PGSC0003DMT400060832
>t0000116_7215	Score: 2.5	PGSC0003DMG400024004|PGSC0003DMT400061680
>t0000117_7171	Score: 2.5	PGSC0003DMG400015327|PGSC0003DMT400039626
>t0000117_7171	Score: 2.5	PGSC0003DMG400022866|PGSC0003DMT400058855
>t0000117_7171	Score: 2.5	PGSC0003DMG400028591|PGSC0003DMT400073599
>t0000117_7171	Score: 2.5	PGSC0003DMG400025748|PGSC0003DMT400066158
>t0000117_7171	Score: 2.5	PGSC0003DMG400042612|PGSC0003DMT400093041
>t0000118_7091	Score: 2.5	PGSC0003DMG400003551|PGSC0003DMT400009133
>t0000118_7091	Score: 2.5	PGSC0003DMG402015339|PGSC0003DMT400039661
>t0000118_7091	Score: 2.5	PGSC0003DMG400015390|PGSC0003DMT400039815
>t0000119_7090	Score: 2.5	PGSC0003DMG401006174|PGSC0003DMT400015797
>t0000119_7090	Score: 2.2	PGSC0003DMG400011541|PGSC0003DMT400030125
>t0000119_7090	Score: 2.5	PGSC0003DMG400008122|PGSC0003DMT400020977
>t0000119_7090	Score: 2.5	PGSC0003DMG400008122|PGSC0003DMT400020978
>t0000119_7090	Score: 2.2	PGSC0003DMG400011541|PGSC0003DMT400030124
>t0000119_7090	Score: 2.5	PGSC0003DMG400015653|PGSC0003DMT400040434
>t0000119_7090	Score: 2.0	PGSC0003DMG400022169|PGSC0003DMT400057050
>t0000119_7090	Score: 2.5	PGSC0003DMG400015653|PGSC0003DMT400040433
>t0000119_7090	Score: 2.0	PGSC0003DMG400021472|PGSC0003DMT400055319
>t0000119_7090	Score: 2.0	PGSC0003DMG400022169|PGSC0003DMT400057049
>t0000119_7090	Score: 2.0	PGSC0003DMG400030213|PGSC0003DMT400077649
>t0000119_7090	Score: 2.5	PGSC0003DMG400023853|PGSC0003DMT400061289
>t0000119_7090	Score: 2.5	PGSC0003DMG400029580|PGSC0003DMT400076065
>t0000119_7090	Score: 2.0	PGSC0003DMG400030213|PGSC0003DMT400077650
>t0000121_7002	Score: 2.0	EPlSTUG00000000330|EPlSTUT00000000330
>t0000121_7002	Score: 2.5	EPlSTUG00000002634|EPlSTUT00000002634
>t0000121_7002	Score: 2.5	EPlSTUG00000003386|EPlSTUT00000003386
>t0000122_6992	Score: 2.2	PGSC0003DMG400012944|PGSC0003DMT400033696
>t0000122_6992	Score: 2.2	PGSC0003DMG400012944|PGSC0003DMT400033697
>t0000122_6992	Score: 2.2	PGSC0003DMG400012944|PGSC0003DMT400033694
>t0000122_6992	Score: 2.2	PGSC0003DMG400012944|PGSC0003DMT400033695
>t0000122_6992	Score: 2.5	PGSC0003DMG400020204|PGSC0003DMT400052054
>t0000122_6992	Score: 2.5	PGSC0003DMG401031249|PGSC0003DMT400080271
>t0000123_6971	Score: 2.0	PGSC0003DMG400019624|PGSC0003DMT400050497
>t0000123_6971	Score: 2.0	PGSC0003DMG400019624|PGSC0003DMT400050494
>t0000123_6971	Score: 2.0	PGSC0003DMG400019624|PGSC0003DMT400050496
>t0000123_6971	Score: 2.0	PGSC0003DMG400019624|PGSC0003DMT400050495
>t0000123_6971	Score: 2.5	PGSC0003DMG400042277|PGSC0003DMT400092706
>t0000124_6909	Score: 2.2	PGSC0003DMG400013643|PGSC0003DMT400035492
>t0000124_6909	Score: 2.2	PGSC0003DMG400017644|PGSC0003DMT400045484
>t0000124_6909	Score: 2.2	PGSC0003DMG400017644|PGSC0003DMT400045482
>t0000124_6909	Score: 2.2	PGSC0003DMG400017644|PGSC0003DMT400045483
>t0000124_6909	Score: 2.2	PGSC0003DMG400017644|PGSC0003DMT400045485
>t0000124_6909	Score: 2.5	PGSC0003DMG400039305|PGSC0003DMT400089734
>t0000124_6909	Score: 1.8	PGSC0003DMG400035257|PGSC0003DMT400085686
>t0000124_6909	Score: 2.2	PGSC0003DMG400032822|PGSC0003DMT400082802
>t0000126_6803	Score: 2.5	PGSC0003DMG402006284|PGSC0003DMT400016077
>t0000126_6803	Score: 2.5	PGSC0003DMG402003570|PGSC0003DMT400009200
>t0000126_6803	Score: 2.5	PGSC0003DMG400028443|PGSC0003DMT400073140
>t0000126_6803	Score: 2.5	PGSC0003DMG400028443|PGSC0003DMT400073139
>t0000127_6788	Score: 1.5	EPlSTUG00000000569|EPlSTUT00000000569
>t0000127_6788	Score: 2.5	PGSC0003DMG402000668|PGSC0003DMT400001783
>t0000127_6788	Score: 2.5	PGSC0003DMG402000668|PGSC0003DMT400001784
>t0000127_6788	Score: 2.5	PGSC0003DMG402000668|PGSC0003DMT400001782
>t0000127_6788	Score: 2.2	PGSC0003DMG400001733|PGSC0003DMT400004366
>t0000127_6788	Score: 2.5	PGSC0003DMG400002810|PGSC0003DMT400007302
>t0000127_6788	Score: 2.2	PGSC0003DMG400001733|PGSC0003DMT400004365
>t0000127_6788	Score: 2.5	PGSC0003DMG400003144|PGSC0003DMT400008149
>t0000127_6788	Score: 2.5	PGSC0003DMG401002659|PGSC0003DMT400006848
>t0000127_6788	Score: 2.5	PGSC0003DMG400003194|PGSC0003DMT400008281
>t0000127_6788	Score: 2.5	PGSC0003DMG400005293|PGSC0003DMT400013555
>t0000127_6788	Score: 2.5	PGSC0003DMG400006837|PGSC0003DMT400017630
>t0000127_6788	Score: 2.5	PGSC0003DMG400007068|PGSC0003DMT400018207
>t0000127_6788	Score: 2.2	PGSC0003DMG403004568|PGSC0003DMT400011606
>t0000127_6788	Score: 1.5	PGSC0003DMG400003629|PGSC0003DMT400009339
>t0000127_6788	Score: 2.5	PGSC0003DMG400004933|PGSC0003DMT400012616
>t0000127_6788	Score: 2.2	PGSC0003DMG403004568|PGSC0003DMT400011605
>t0000127_6788	Score: 2.2	PGSC0003DMG400003429|PGSC0003DMT400008826
>t0000127_6788	Score: 2.5	PGSC0003DMG400005308|PGSC0003DMT400013590
>t0000127_6788	Score: 2.5	PGSC0003DMG400006719|PGSC0003DMT400017239
>t0000127_6788	Score: 2.5	PGSC0003DMG400006719|PGSC0003DMT400017238
>t0000127_6788	Score: 2.5	PGSC0003DMG402013876|PGSC0003DMT400036029
>t0000127_6788	Score: 2.5	PGSC0003DMG400009029|PGSC0003DMT400023309
>t0000127_6788	Score: 2.2	PGSC0003DMG400009914|PGSC0003DMT400025677
>t0000127_6788	Score: 2.5	PGSC0003DMG400010416|PGSC0003DMT400026996
>t0000127_6788	Score: 2.5	PGSC0003DMG400009029|PGSC0003DMT400023310
>t0000127_6788	Score: 2.5	PGSC0003DMG400011447|PGSC0003DMT400029792
>t0000127_6788	Score: 2.2	PGSC0003DMG400014230|PGSC0003DMT400036917
>t0000127_6788	Score: 2.2	PGSC0003DMG400012747|PGSC0003DMT400033191
>t0000127_6788	Score: 2.5	PGSC0003DMG400015335|PGSC0003DMT400039655
>t0000127_6788	Score: 2.5	PGSC0003DMG400008738|PGSC0003DMT400022542
>t0000127_6788	Score: 2.5	PGSC0003DMG400009129|PGSC0003DMT400023575
>t0000127_6788	Score: 2.5	PGSC0003DMG400013616|PGSC0003DMT400035439
>t0000127_6788	Score: 2.0	PGSC0003DMG400009982|PGSC0003DMT400025850
>t0000127_6788	Score: 2.0	PGSC0003DMG402015009|PGSC0003DMT400038843
>t0000127_6788	Score: 2.2	PGSC0003DMG400014230|PGSC0003DMT400036916
>t0000127_6788	Score: 2.5	PGSC0003DMG402013464|PGSC0003DMT400035012
>t0000127_6788	Score: 2.2	PGSC0003DMG400009418|PGSC0003DMT400024354
>t0000127_6788	Score: 2.5	PGSC0003DMG400010234|PGSC0003DMT400026510
>t0000127_6788	Score: 2.5	PGSC0003DMG400012073|PGSC0003DMT400031489
>t0000127_6788	Score: 2.2	PGSC0003DMG400014230|PGSC0003DMT400036918
>t0000127_6788	Score: 2.0	PGSC0003DMG400012955|PGSC0003DMT400033720
>t0000127_6788	Score: 2.5	PGSC0003DMG400011447|PGSC0003DMT400029793
>t0000127_6788	Score: 2.5	PGSC0003DMG402013876|PGSC0003DMT400036030
>t0000127_6788	Score: 2.5	PGSC0003DMG400008128|PGSC0003DMT400020987
>t0000127_6788	Score: 2.0	PGSC0003DMG400009180|PGSC0003DMT400023732
>t0000127_6788	Score: 2.2	PGSC0003DMG400010747|PGSC0003DMT400027925
>t0000127_6788	Score: 2.5	PGSC0003DMG400009031|PGSC0003DMT400023313
>t0000127_6788	Score: 2.2	PGSC0003DMG400011535|PGSC0003DMT400030105
>t0000127_6788	Score: 2.5	PGSC0003DMG400010234|PGSC0003DMT400026509
>t0000127_6788	Score: 2.5	PGSC0003DMG402013464|PGSC0003DMT400035011
>t0000127_6788	Score: 2.2	PGSC0003DMG400011246|PGSC0003DMT400029242
>t0000127_6788	Score: 1.5	PGSC0003DMG400016236|PGSC0003DMT400041844
>t0000127_6788	Score: 2.5	PGSC0003DMG402016404|PGSC0003DMT400042262
>t0000127_6788	Score: 2.2	PGSC0003DMG400021682|PGSC0003DMT400055827
>t0000127_6788	Score: 2.2	PGSC0003DMG400016854|PGSC0003DMT400043416
>t0000127_6788	Score: 2.5	PGSC0003DMG402021921|PGSC0003DMT400056412
>t0000127_6788	Score: 2.5	PGSC0003DMG400023357|PGSC0003DMT400060026
>t0000127_6788	Score: 2.5	PGSC0003DMG400015846|PGSC0003DMT400040962
>t0000127_6788	Score: 2.0	PGSC0003DMG400021515|PGSC0003DMT400055415
>t0000127_6788	Score: 2.5	PGSC0003DMG400023473|PGSC0003DMT400060346
>t0000127_6788	Score: 2.2	PGSC0003DMG401020085|PGSC0003DMT400051732
>t0000127_6788	Score: 2.5	PGSC0003DMG400023357|PGSC0003DMT400060025
>t0000127_6788	Score: 2.5	PGSC0003DMG400022591|PGSC0003DMT400058189
>t0000127_6788	Score: 2.5	PGSC0003DMG400020691|PGSC0003DMT400053314
>t0000127_6788	Score: 2.5	PGSC0003DMG400021547|PGSC0003DMT400055484
>t0000127_6788	Score: 2.2	PGSC0003DMG400022359|PGSC0003DMT400057581
>t0000127_6788	Score: 2.5	PGSC0003DMG400021894|PGSC0003DMT400056351
>t0000127_6788	Score: 2.5	PGSC0003DMG400023473|PGSC0003DMT400060344
>t0000127_6788	Score: 2.0	PGSC0003DMG402021159|PGSC0003DMT400054515
>t0000127_6788	Score: 2.5	PGSC0003DMG400021864|PGSC0003DMT400056269
>t0000127_6788	Score: 2.2	PGSC0003DMG400020684|PGSC0003DMT400053299
>t0000127_6788	Score: 2.2	PGSC0003DMG401020085|PGSC0003DMT400051733
>t0000127_6788	Score: 2.2	PGSC0003DMG400020684|PGSC0003DMT400053300
>t0000127_6788	Score: 2.5	PGSC0003DMG400016892|PGSC0003DMT400043510
>t0000127_6788	Score: 1.8	PGSC0003DMG400019687|PGSC0003DMT400050688
>t0000127_6788	Score: 2.0	PGSC0003DMG400021515|PGSC0003DMT400055416
>t0000127_6788	Score: 2.5	PGSC0003DMG400020534|PGSC0003DMT400052927
>t0000127_6788	Score: 2.5	PGSC0003DMG400015364|PGSC0003DMT400039759
>t0000127_6788	Score: 2.5	PGSC0003DMG400022860|PGSC0003DMT400058832
>t0000127_6788	Score: 2.5	PGSC0003DMG400015846|PGSC0003DMT400040963
>t0000127_6788	Score: 2.5	PGSC0003DMG400018939|PGSC0003DMT400048730
>t0000127_6788	Score: 2.2	PGSC0003DMG400016854|PGSC0003DMT400043415
>t0000127_6788	Score: 2.5	PGSC0003DMG400023473|PGSC0003DMT400060345
>t0000127_6788	Score: 2.2	PGSC0003DMG401020085|PGSC0003DMT400051731
>t0000127_6788	Score: 2.0	PGSC0003DMG400023271|PGSC0003DMT400059831
>t0000127_6788	Score: 2.5	PGSC0003DMG400023357|PGSC0003DMT400060024
>t0000127_6788	Score: 2.5	PGSC0003DMG402021921|PGSC0003DMT400056411
>t0000127_6788	Score: 2.5	PGSC0003DMG400018543|PGSC0003DMT400047709
>t0000127_6788	Score: 2.0	PGSC0003DMG400021515|PGSC0003DMT400055418
>t0000127_6788	Score: 2.5	PGSC0003DMG400023473|PGSC0003DMT400060343
>t0000127_6788	Score: 2.5	PGSC0003DMG400022861|PGSC0003DMT400058836
>t0000127_6788	Score: 2.5	PGSC0003DMG400023357|PGSC0003DMT400060023
>t0000127_6788	Score: 2.2	PGSC0003DMG401020085|PGSC0003DMT400051735
>t0000127_6788	Score: 2.5	PGSC0003DMG402028489|PGSC0003DMT400073311
>t0000127_6788	Score: 1.8	PGSC0003DMG400030079|PGSC0003DMT400077337
>t0000127_6788	Score: 2.5	PGSC0003DMG402028489|PGSC0003DMT400073313
>t0000127_6788	Score: 2.2	PGSC0003DMG401024975|PGSC0003DMT400064284
>t0000127_6788	Score: 2.5	PGSC0003DMG400024764|PGSC0003DMT400063717
>t0000127_6788	Score: 2.5	PGSC0003DMG400024214|PGSC0003DMT400062222
>t0000127_6788	Score: 2.5	PGSC0003DMG400030474|PGSC0003DMT400078298
>t0000127_6788	Score: 2.2	PGSC0003DMG400027868|PGSC0003DMT400071640
>t0000127_6788	Score: 2.5	PGSC0003DMG400028483|PGSC0003DMT400073298
>t0000127_6788	Score: 2.0	PGSC0003DMG400029822|PGSC0003DMT400076685
>t0000127_6788	Score: 2.5	PGSC0003DMG400026871|PGSC0003DMT400069083
>t0000127_6788	Score: 2.5	PGSC0003DMG400023857|PGSC0003DMT400061295
>t0000127_6788	Score: 1.8	PGSC0003DMG400027517|PGSC0003DMT400070773
>t0000127_6788	Score: 2.5	PGSC0003DMG400028762|PGSC0003DMT400073999
>t0000127_6788	Score: 2.5	PGSC0003DMG402028489|PGSC0003DMT400073312
>t0000127_6788	Score: 2.5	PGSC0003DMG400031103|PGSC0003DMT400079864
>t0000127_6788	Score: 2.5	PGSC0003DMG402028489|PGSC0003DMT400073314
>t0000127_6788	Score: 2.0	PGSC0003DMG402027016|PGSC0003DMT400069495
>t0000127_6788	Score: 2.0	PGSC0003DMG400025977|PGSC0003DMT400066812
>t0000127_6788	Score: 2.5	PGSC0003DMG400029931|PGSC0003DMT400076953
>t0000127_6788	Score: 2.5	PGSC0003DMG400027734|PGSC0003DMT400071312
>t0000127_6788	Score: 2.0	PGSC0003DMG400025404|PGSC0003DMT400065360
>t0000127_6788	Score: 2.5	PGSC0003DMG400029931|PGSC0003DMT400076952
>t0000127_6788	Score: 2.0	PGSC0003DMG400025977|PGSC0003DMT400066810
>t0000127_6788	Score: 2.5	PGSC0003DMG400024475|PGSC0003DMT400062879
>t0000127_6788	Score: 2.5	PGSC0003DMG400024475|PGSC0003DMT400062880
>t0000127_6788	Score: 2.5	PGSC0003DMG400029931|PGSC0003DMT400076954
>t0000127_6788	Score: 2.2	PGSC0003DMG400024802|PGSC0003DMT400063803
>t0000127_6788	Score: 2.5	PGSC0003DMG400030474|PGSC0003DMT400078299
>t0000127_6788	Score: 2.5	PGSC0003DMG400034375|PGSC0003DMT400084804
>t0000127_6788	Score: 2.5	PGSC0003DMG400037376|PGSC0003DMT400087805
>t0000128_6782	Score: 2.5	PGSC0003DMG400004088|PGSC0003DMT400010466
>t0000131_6588	Score: 1.5	PGSC0003DMG400007121|PGSC0003DMT400018338
>t0000131_6588	Score: 2.5	PGSC0003DMG400004294|PGSC0003DMT400010965
>t0000131_6588	Score: 2.0	PGSC0003DMG400022254|PGSC0003DMT400057307
>t0000131_6588	Score: 2.0	PGSC0003DMG400022254|PGSC0003DMT400057305
>t0000131_6588	Score: 2.5	PGSC0003DMG400017507|PGSC0003DMT400045133
>t0000131_6588	Score: 2.0	PGSC0003DMG400022254|PGSC0003DMT400057306
>t0000134_6536	Score: 2.5	PGSC0003DMG400030792|PGSC0003DMT400079117
>t0000134_6536	Score: 2.0	PGSC0003DMG400029292|PGSC0003DMT400075320
>t0000135_6516	Score: 2.5	PGSC0003DMG400001744|PGSC0003DMT400004384
>t0000135_6516	Score: 2.5	PGSC0003DMG401012812|PGSC0003DMT400033353
>t0000135_6516	Score: 2.5	PGSC0003DMG400043777|PGSC0003DMT400094206
>t0000136_6515	Score: 2.0	PGSC0003DMG400005661|PGSC0003DMT400014431
>t0000136_6515	Score: 2.5	PGSC0003DMG400005981|PGSC0003DMT400015339
>t0000136_6515	Score: 2.5	PGSC0003DMG400005981|PGSC0003DMT400015338
>t0000136_6515	Score: 2.0	PGSC0003DMG400012371|PGSC0003DMT400032198
>t0000136_6515	Score: 2.5	PGSC0003DMG400019502|PGSC0003DMT400050219
>t0000137_6473	Score: 2.5	PGSC0003DMG400000915|PGSC0003DMT400002386
>t0000137_6473	Score: 2.2	PGSC0003DMG400003164|PGSC0003DMT400008206
>t0000137_6473	Score: 2.5	PGSC0003DMG400013882|PGSC0003DMT400036038
>t0000138_6388	Score: 2.0	PGSC0003DMG400002613|PGSC0003DMT400006731
>t0000138_6388	Score: 2.0	PGSC0003DMG400006514|PGSC0003DMT400016669
>t0000138_6388	Score: 2.0	PGSC0003DMG400003910|PGSC0003DMT400009988
>t0000138_6388	Score: 2.2	PGSC0003DMG401016989|PGSC0003DMT400043766
>t0000138_6388	Score: 2.5	PGSC0003DMG400031182|PGSC0003DMT400080080
>t0000138_6388	Score: 2.5	PGSC0003DMG400031182|PGSC0003DMT400080079
>t0000138_6388	Score: 2.5	PGSC0003DMG400031182|PGSC0003DMT400080081
>t0000138_6388	Score: 2.5	PGSC0003DMG400038827|PGSC0003DMT400089256
>t0000139_6279	Score: 2.2	PGSC0003DMG400012944|PGSC0003DMT400033696
>t0000139_6279	Score: 2.2	PGSC0003DMG400012944|PGSC0003DMT400033697
>t0000139_6279	Score: 2.2	PGSC0003DMG400012944|PGSC0003DMT400033694
>t0000139_6279	Score: 2.5	PGSC0003DMG400007843|PGSC0003DMT400020285
>t0000139_6279	Score: 2.2	PGSC0003DMG400012944|PGSC0003DMT400033695
>t0000142_6205	Score: 2.0	PGSC0003DMG400004873|PGSC0003DMT400012479
>t0000142_6205	Score: 2.0	PGSC0003DMG400012445|PGSC0003DMT400032401
>t0000142_6205	Score: 2.0	PGSC0003DMG400013384|PGSC0003DMT400034820
>t0000142_6205	Score: 2.0	PGSC0003DMG400012445|PGSC0003DMT400032400
>t0000142_6205	Score: 2.5	PGSC0003DMG400016941|PGSC0003DMT400043632
>t0000142_6205	Score: 2.5	PGSC0003DMG400015596|PGSC0003DMT400040286
>t0000142_6205	Score: 2.5	PGSC0003DMG400016941|PGSC0003DMT400043631
>t0000142_6205	Score: 2.5	PGSC0003DMG400023060|PGSC0003DMT400059355
>t0000142_6205	Score: 2.5	PGSC0003DMG401029567|PGSC0003DMT400076036
>t0000142_6205	Score: 2.5	PGSC0003DMG401029567|PGSC0003DMT400076037
>t0000142_6205	Score: 2.5	PGSC0003DMG401029567|PGSC0003DMT400076035
>t0000142_6205	Score: 2.5	PGSC0003DMG401029567|PGSC0003DMT400076034
>t0000143_6171	Score: 2.5	PGSC0003DMG400001523|PGSC0003DMT400003868
>t0000143_6171	Score: 2.5	PGSC0003DMG400014310|PGSC0003DMT400037121
>t0000143_6171	Score: 2.0	PGSC0003DMG400015007|PGSC0003DMT400038834
>t0000143_6171	Score: 2.0	PGSC0003DMG400015007|PGSC0003DMT400038835
>t0000143_6171	Score: 2.0	PGSC0003DMG400015007|PGSC0003DMT400038833
>t0000143_6171	Score: 1.8	PGSC0003DMG400016453|PGSC0003DMT400042428
>t0000144_6167	Score: 2.2	PGSC0003DMG401000527|PGSC0003DMT400001423
>t0000144_6167	Score: 2.2	PGSC0003DMG401000527|PGSC0003DMT400001421
>t0000144_6167	Score: 2.2	PGSC0003DMG401000527|PGSC0003DMT400001422
>t0000144_6167	Score: 2.2	PGSC0003DMG401000527|PGSC0003DMT400001420
>t0000144_6167	Score: 2.2	PGSC0003DMG402001782|PGSC0003DMT400004477
>t0000144_6167	Score: 2.5	PGSC0003DMG400005648|PGSC0003DMT400014396
>t0000144_6167	Score: 2.5	PGSC0003DMG400015104|PGSC0003DMT400039061
>t0000144_6167	Score: 2.5	PGSC0003DMG400013151|PGSC0003DMT400034205
>t0000144_6167	Score: 2.5	PGSC0003DMG400013151|PGSC0003DMT400034206
>t0000144_6167	Score: 2.5	PGSC0003DMG400013151|PGSC0003DMT400034204
>t0000144_6167	Score: 2.2	PGSC0003DMG401018402|PGSC0003DMT400047348
>t0000144_6167	Score: 2.5	PGSC0003DMG400025374|PGSC0003DMT400065276
>t0000146_6074	Score: 2.2	PGSC0003DMG400007359|PGSC0003DMT400018994
>t0000146_6074	Score: 2.5	PGSC0003DMG400010406|PGSC0003DMT400026980
>t0000146_6074	Score: 2.5	PGSC0003DMG400018337|PGSC0003DMT400047233
>t0000146_6074	Score: 2.5	PGSC0003DMG401024331|PGSC0003DMT400062523
>t0000146_6074	Score: 2.5	PGSC0003DMG400024840|PGSC0003DMT400063908
>t0000146_6074	Score: 2.5	PGSC0003DMG401024331|PGSC0003DMT400062532
>t0000146_6074	Score: 2.5	PGSC0003DMG401024331|PGSC0003DMT400062529
>t0000149_5998	Score: 2.5	PGSC0003DMG400004600|PGSC0003DMT400011716
>t0000149_5998	Score: 2.5	PGSC0003DMG400004600|PGSC0003DMT400011715
>t0000149_5998	Score: 1.5	PGSC0003DMG400012201|PGSC0003DMT400031803
>t0000149_5998	Score: 2.0	PGSC0003DMG400029414|PGSC0003DMT400075620
>t0000149_5998	Score: 2.2	PGSC0003DMG400024138|PGSC0003DMT400062022
>t0000152_5969	Score: 2.5	EPlSTUG00000001988|EPlSTUT00000001988
>t0000152_5969	Score: 2.0	PGSC0003DMG400017156|PGSC0003DMT400044195
>t0000152_5969	Score: 2.5	PGSC0003DMG400024541|PGSC0003DMT400063086
>t0000152_5969	Score: 2.5	PGSC0003DMG400029362|PGSC0003DMT400075514
>t0000152_5969	Score: 2.5	PGSC0003DMG400029362|PGSC0003DMT400075513
>t0000154_5923	Score: 2.5	PGSC0003DMG400011161|PGSC0003DMT400028996
>t0000154_5923	Score: 2.5	PGSC0003DMG400011161|PGSC0003DMT400028994
>t0000154_5923	Score: 2.5	PGSC0003DMG400013384|PGSC0003DMT400034820
>t0000154_5923	Score: 2.5	PGSC0003DMG400011161|PGSC0003DMT400028997
>t0000154_5923	Score: 2.5	PGSC0003DMG400011161|PGSC0003DMT400028995
>t0000154_5923	Score: 2.5	PGSC0003DMG400023520|PGSC0003DMT400060468
>t0000154_5923	Score: 2.5	PGSC0003DMG400023520|PGSC0003DMT400060469
>t0000154_5923	Score: 2.2	PGSC0003DMG400019896|PGSC0003DMT400051231
>t0000154_5923	Score: 2.5	PGSC0003DMG400023115|PGSC0003DMT400059496
>t0000154_5923	Score: 2.5	PGSC0003DMG400017311|PGSC0003DMT400044600
>t0000154_5923	Score: 2.5	PGSC0003DMG400017311|PGSC0003DMT400044601
>t0000154_5923	Score: 2.2	PGSC0003DMG400025190|PGSC0003DMT400064874
>t0000154_5923	Score: 2.2	PGSC0003DMG400025190|PGSC0003DMT400064876
>t0000154_5923	Score: 2.0	PGSC0003DMG400029169|PGSC0003DMT400075002
>t0000154_5923	Score: 2.2	PGSC0003DMG400025190|PGSC0003DMT400064875
>t0000157_5852	Score: 2.5	PGSC0003DMG400023453|PGSC0003DMT400060294
>t0000157_5852	Score: 2.5	PGSC0003DMG400039353|PGSC0003DMT400089782
>t0000158_5813	Score: 2.5	PGSC0003DMG400008405|PGSC0003DMT400021666
>t0000158_5813	Score: 2.5	PGSC0003DMG402008392|PGSC0003DMT400021630
>t0000158_5813	Score: 2.5	PGSC0003DMG400008405|PGSC0003DMT400021667
>t0000159_5665	Score: 2.5	EPlSTUG00000002634|EPlSTUT00000002634
>t0000159_5665	Score: 2.2	PGSC0003DMG400008160|PGSC0003DMT400021076
>t0000159_5665	Score: 2.2	PGSC0003DMG400008160|PGSC0003DMT400021075
>t0000159_5665	Score: 2.2	PGSC0003DMG402027860|PGSC0003DMT400071614
>t0000161_5568	Score: 2.0	PGSC0003DMG401009385|PGSC0003DMT400024279
>t0000161_5568	Score: 2.0	PGSC0003DMG401009385|PGSC0003DMT400024280
>t0000161_5568	Score: 2.5	PGSC0003DMG401022886|PGSC0003DMT400058902
>t0000161_5568	Score: 2.5	PGSC0003DMG401022886|PGSC0003DMT400058900
>t0000161_5568	Score: 2.5	PGSC0003DMG401022886|PGSC0003DMT400058901
>t0000161_5568	Score: 2.5	PGSC0003DMG401022886|PGSC0003DMT400058899
>t0000161_5568	Score: 2.5	PGSC0003DMG400030005|PGSC0003DMT400077161
>t0000161_5568	Score: 2.5	PGSC0003DMG400025095|PGSC0003DMT400064580
>t0000161_5568	Score: 2.5	PGSC0003DMG400030005|PGSC0003DMT400077160
>t0000162_5561	Score: 2.5	PGSC0003DMG402009214|PGSC0003DMT400023812
>t0000162_5561	Score: 2.5	PGSC0003DMG402009214|PGSC0003DMT400023813
>t0000163_5557	Score: 2.2	PGSC0003DMG400003503|PGSC0003DMT400008999
>t0000163_5557	Score: 2.5	PGSC0003DMG400004761|PGSC0003DMT400012143
>t0000163_5557	Score: 2.2	PGSC0003DMG400003503|PGSC0003DMT400008994
>t0000163_5557	Score: 2.2	PGSC0003DMG400003503|PGSC0003DMT400009000
>t0000163_5557	Score: 2.2	PGSC0003DMG400003503|PGSC0003DMT400008997
>t0000163_5557	Score: 2.5	PGSC0003DMG400022258|PGSC0003DMT400057319
>t0000163_5557	Score: 2.0	PGSC0003DMG400022626|PGSC0003DMT400058277
>t0000163_5557	Score: 2.5	PGSC0003DMG400022258|PGSC0003DMT400057320
>t0000163_5557	Score: 2.5	PGSC0003DMG400022258|PGSC0003DMT400057318
>t0000163_5557	Score: 2.5	PGSC0003DMG400027478|PGSC0003DMT400070685
>t0000164_5540	Score: 1.5	PGSC0003DMG400002765|PGSC0003DMT400007149
>t0000164_5540	Score: 1.5	PGSC0003DMG400002765|PGSC0003DMT400007150
>t0000164_5540	Score: 1.5	PGSC0003DMG400002765|PGSC0003DMT400007148
>t0000164_5540	Score: 2.5	PGSC0003DMG400004076|PGSC0003DMT400010436
>t0000164_5540	Score: 2.5	PGSC0003DMG400004076|PGSC0003DMT400010434
>t0000164_5540	Score: 2.5	PGSC0003DMG400004076|PGSC0003DMT400010435
>t0000164_5540	Score: 2.5	PGSC0003DMG402012244|PGSC0003DMT400031919
>t0000164_5540	Score: 2.5	PGSC0003DMG400014190|PGSC0003DMT400036805
>t0000164_5540	Score: 2.5	PGSC0003DMG400014190|PGSC0003DMT400036806
>t0000164_5540	Score: 2.5	PGSC0003DMG400017959|PGSC0003DMT400046261
>t0000164_5540	Score: 1.5	PGSC0003DMG400017526|PGSC0003DMT400045183
>t0000164_5540	Score: 2.2	PGSC0003DMG400022709|PGSC0003DMT400058477
>t0000164_5540	Score: 2.5	PGSC0003DMG400040069|PGSC0003DMT400090498
>t0000166_5489	Score: 2.5	PGSC0003DMG400023534|PGSC0003DMT400060505
>t0000166_5489	Score: 2.5	PGSC0003DMG400028738|PGSC0003DMT400073952
>t0000166_5489	Score: 2.5	PGSC0003DMG400028738|PGSC0003DMT400073950
>t0000167_5478	Score: 1.8	PGSC0003DMG400010559|PGSC0003DMT400027382
>t0000167_5478	Score: 2.5	PGSC0003DMG400011324|PGSC0003DMT400029448
>t0000167_5478	Score: 2.5	PGSC0003DMG400011324|PGSC0003DMT400029449
>t0000167_5478	Score: 2.0	PGSC0003DMG401012812|PGSC0003DMT400033353
>t0000169_5452	Score: 2.5	PGSC0003DMG400010443|PGSC0003DMT400027076
>t0000169_5452	Score: 2.5	PGSC0003DMG400010443|PGSC0003DMT400027074
>t0000169_5452	Score: 2.0	PGSC0003DMG400008208|PGSC0003DMT400021198
>t0000169_5452	Score: 2.5	PGSC0003DMG400013896|PGSC0003DMT400036085
>t0000169_5452	Score: 2.2	PGSC0003DMG400023790|PGSC0003DMT400061145
>t0000170_5447	Score: 2.2	PGSC0003DMG400003305|PGSC0003DMT400008547
>t0000170_5447	Score: 2.2	PGSC0003DMG400003305|PGSC0003DMT400008548
>t0000170_5447	Score: 2.2	PGSC0003DMG400016150|PGSC0003DMT400041660
>t0000170_5447	Score: 2.5	PGSC0003DMG400021922|PGSC0003DMT400056413
>t0000170_5447	Score: 2.5	PGSC0003DMG400020937|PGSC0003DMT400053964
>t0000170_5447	Score: 2.2	PGSC0003DMG400016150|PGSC0003DMT400041658
>t0000170_5447	Score: 2.2	PGSC0003DMG400016150|PGSC0003DMT400041659
>t0000171_5441	Score: 2.5	PGSC0003DMG402006600|PGSC0003DMT400016873
>t0000171_5441	Score: 2.5	PGSC0003DMG402018708|PGSC0003DMT400048159
>t0000171_5441	Score: 2.5	PGSC0003DMG402018708|PGSC0003DMT400048157
>t0000171_5441	Score: 2.5	PGSC0003DMG402018708|PGSC0003DMT400048160
>t0000171_5441	Score: 2.5	PGSC0003DMG400022252|PGSC0003DMT400057291
>t0000171_5441	Score: 2.5	PGSC0003DMG400022252|PGSC0003DMT400057290
>t0000171_5441	Score: 2.5	PGSC0003DMG400027361|PGSC0003DMT400070375
>t0000171_5441	Score: 2.2	PGSC0003DMG400024073|PGSC0003DMT400061869
>t0000171_5441	Score: 2.2	PGSC0003DMG400024073|PGSC0003DMT400061867
>t0000171_5441	Score: 2.5	PGSC0003DMG400027361|PGSC0003DMT400070374
>t0000178_5302	Score: 2.5	PGSC0003DMG400043574|PGSC0003DMT400094003
>t0000179_5302	Score: 2.5	PGSC0003DMG400011374|PGSC0003DMT400029581
>t0000179_5302	Score: 2.5	PGSC0003DMG400012458|PGSC0003DMT400032434
>t0000179_5302	Score: 2.5	PGSC0003DMG400011374|PGSC0003DMT400029582
>t0000179_5302	Score: 2.2	PGSC0003DMG401013422|PGSC0003DMT400034913
>t0000179_5302	Score: 2.2	PGSC0003DMG400018344|PGSC0003DMT400047245
>t0000179_5302	Score: 2.0	PGSC0003DMG400020265|PGSC0003DMT400052241
>t0000179_5302	Score: 2.5	PGSC0003DMG401018810|PGSC0003DMT400048424
>t0000179_5302	Score: 2.2	PGSC0003DMG400018344|PGSC0003DMT400047244
>t0000179_5302	Score: 2.0	PGSC0003DMG400029311|PGSC0003DMT400075367
>t0000179_5302	Score: 2.5	PGSC0003DMG400025148|PGSC0003DMT400064740
>t0000179_5302	Score: 2.2	PGSC0003DMG400046610|PGSC0003DMT400097039
>t0000180_5280	Score: 2.5	PGSC0003DMG401009385|PGSC0003DMT400024279
>t0000180_5280	Score: 2.5	PGSC0003DMG401009385|PGSC0003DMT400024280
>t0000180_5280	Score: 2.5	PGSC0003DMG400020204|PGSC0003DMT400052054
>t0000180_5280	Score: 2.5	PGSC0003DMG400015681|PGSC0003DMT400040528
>t0000180_5280	Score: 2.5	PGSC0003DMG403015682|PGSC0003DMT400040535
>t0000180_5280	Score: 2.5	PGSC0003DMG400015681|PGSC0003DMT400040527
>t0000180_5280	Score: 2.5	PGSC0003DMG400027999|PGSC0003DMT400071953
>t0000180_5280	Score: 2.2	PGSC0003DMG400025095|PGSC0003DMT400064580
>t0000181_5243	Score: 2.5	PGSC0003DMG400003020|PGSC0003DMT400007810
>t0000181_5243	Score: 1.5	PGSC0003DMG400002980|PGSC0003DMT400007707
>t0000181_5243	Score: 2.0	PGSC0003DMG400007344|PGSC0003DMT400018940
>t0000181_5243	Score: 2.5	PGSC0003DMG400014047|PGSC0003DMT400036467
>t0000181_5243	Score: 2.0	PGSC0003DMG400009455|PGSC0003DMT400024448
>t0000181_5243	Score: 2.0	PGSC0003DMG400013721|PGSC0003DMT400035672
>t0000181_5243	Score: 2.5	PGSC0003DMG401018696|PGSC0003DMT400048116
>t0000181_5243	Score: 2.0	PGSC0003DMG400018722|PGSC0003DMT400048202
>t0000181_5243	Score: 2.5	PGSC0003DMG400018570|PGSC0003DMT400047772
>t0000181_5243	Score: 2.5	PGSC0003DMG403019668|PGSC0003DMT400050639
>t0000181_5243	Score: 2.5	PGSC0003DMG400019669|PGSC0003DMT400050640
>t0000181_5243	Score: 2.0	PGSC0003DMG400017666|PGSC0003DMT400045554
>t0000181_5243	Score: 2.0	PGSC0003DMG402018576|PGSC0003DMT400047788
>t0000181_5243	Score: 2.5	PGSC0003DMG401020789|PGSC0003DMT400053585
>t0000181_5243	Score: 2.0	PGSC0003DMG402030235|PGSC0003DMT400077717
>t0000181_5243	Score: 2.0	PGSC0003DMG400027409|PGSC0003DMT400070515
>t0000181_5243	Score: 2.0	PGSC0003DMG402027371|PGSC0003DMT400070400
>t0000181_5243	Score: 2.0	PGSC0003DMG400027407|PGSC0003DMT400070503
>t0000181_5243	Score: 2.0	PGSC0003DMG402030236|PGSC0003DMT400077723
>t0000181_5243	Score: 2.5	PGSC0003DMG401027402|PGSC0003DMT400070480
>t0000181_5243	Score: 2.5	PGSC0003DMG402027402|PGSC0003DMT400070482
>t0000181_5243	Score: 2.0	PGSC0003DMG402027371|PGSC0003DMT400070402
>t0000183_5219	Score: 2.5	PGSC0003DMG400015182|PGSC0003DMT400039269
>t0000183_5219	Score: 2.5	PGSC0003DMG400020333|PGSC0003DMT400052379
>t0000183_5219	Score: 2.2	PGSC0003DMG400016887|PGSC0003DMT400043495
>t0000183_5219	Score: 2.5	PGSC0003DMG400020333|PGSC0003DMT400052380
>t0000185_5133	Score: 2.2	PGSC0003DMG400009191|PGSC0003DMT400023765
>t0000185_5133	Score: 2.5	PGSC0003DMG400016265|PGSC0003DMT400041931
>t0000187_5124	Score: 2.5	PGSC0003DMG401001521|PGSC0003DMT400003850
>t0000187_5124	Score: 2.5	PGSC0003DMG401001521|PGSC0003DMT400003851
>t0000187_5124	Score: 2.5	PGSC0003DMG400004401|PGSC0003DMT400011236
>t0000187_5124	Score: 2.5	PGSC0003DMG400004397|PGSC0003DMT400011225
>t0000187_5124	Score: 2.5	PGSC0003DMG400004396|PGSC0003DMT400011224
>t0000187_5124	Score: 2.5	PGSC0003DMG400016160|PGSC0003DMT400041684
>t0000187_5124	Score: 2.5	PGSC0003DMG400030142|PGSC0003DMT400077507
>t0000187_5124	Score: 2.5	PGSC0003DMG400030144|PGSC0003DMT400077519
>t0000189_5097	Score: 2.2	PGSC0003DMG400014651|PGSC0003DMT400037983
>t0000189_5097	Score: 2.0	PGSC0003DMG400022634|PGSC0003DMT400058294
>t0000189_5097	Score: 2.0	PGSC0003DMG400022634|PGSC0003DMT400058293
>t0000189_5097	Score: 2.5	PGSC0003DMG400018994|PGSC0003DMT400048879
>t0000189_5097	Score: 2.5	PGSC0003DMG400027188|PGSC0003DMT400069919
>t0000189_5097	Score: 2.5	PGSC0003DMG400033909|PGSC0003DMT400084281
>t0000190_5082	Score: 1.8	PGSC0003DMG400020333|PGSC0003DMT400052379
>t0000190_5082	Score: 2.2	PGSC0003DMG400019729|PGSC0003DMT400050793
>t0000190_5082	Score: 2.2	PGSC0003DMG400019729|PGSC0003DMT400050792
>t0000190_5082	Score: 1.8	PGSC0003DMG400020333|PGSC0003DMT400052380
>t0000191_5066	Score: 2.5	PGSC0003DMG400007692|PGSC0003DMT400019880
>t0000195_4950	Score: 2.2	PGSC0003DMG400010879|PGSC0003DMT400028204
>t0000195_4950	Score: 2.2	PGSC0003DMG400030964|PGSC0003DMT400079523
>t0000195_4950	Score: 2.2	PGSC0003DMG400030965|PGSC0003DMT400079528
>t0000195_4950	Score: 2.0	PGSC0003DMG400032262|PGSC0003DMT400082107
>t0000195_4950	Score: 2.0	PGSC0003DMG400032262|PGSC0003DMT400082108
>t0000195_4950	Score: 2.0	PGSC0003DMG400032262|PGSC0003DMT400082106
>t0000197_4917	Score: 2.5	PGSC0003DMG400001747|PGSC0003DMT400004388
>t0000197_4917	Score: 2.5	PGSC0003DMG400001747|PGSC0003DMT400004389
>t0000197_4917	Score: 2.5	PGSC0003DMG400001747|PGSC0003DMT400004390
>t0000197_4917	Score: 2.2	PGSC0003DMG400014626|PGSC0003DMT400037916
>t0000197_4917	Score: 2.2	PGSC0003DMG400014626|PGSC0003DMT400037917
>t0000197_4917	Score: 2.2	PGSC0003DMG400021214|PGSC0003DMT400054671
>t0000197_4917	Score: 2.2	PGSC0003DMG400021214|PGSC0003DMT400054670
>t0000197_4917	Score: 2.0	PGSC0003DMG400017150|PGSC0003DMT400044180
>t0000197_4917	Score: 2.5	PGSC0003DMG400028315|PGSC0003DMT400072761
>t0000197_4917	Score: 2.5	PGSC0003DMG400037246|PGSC0003DMT400087675
>t0000197_4917	Score: 2.0	PGSC0003DMG400036682|PGSC0003DMT400087111
>t0000202_4802	Score: 2.5	PGSC0003DMG400030867|PGSC0003DMT400079309
>t0000203_4779	Score: 2.5	PGSC0003DMG400044608|PGSC0003DMT400095037
>t0000208_4612	Score: 2.5	PGSC0003DMG400005981|PGSC0003DMT400015339
>t0000208_4612	Score: 2.5	PGSC0003DMG400005981|PGSC0003DMT400015338
>t0000208_4612	Score: 2.0	PGSC0003DMG400025848|PGSC0003DMT400066517
>t0000209_4608	Score: 2.5	PGSC0003DMG400000180|PGSC0003DMT400000514
>t0000209_4608	Score: 2.5	PGSC0003DMG400004402|PGSC0003DMT400011237
>t0000209_4608	Score: 2.5	PGSC0003DMG400004402|PGSC0003DMT400011238
>t0000209_4608	Score: 2.2	PGSC0003DMG400006922|PGSC0003DMT400017823
>t0000209_4608	Score: 2.2	PGSC0003DMG400006922|PGSC0003DMT400017822
>t0000209_4608	Score: 2.5	PGSC0003DMG400012374|PGSC0003DMT400032205
>t0000209_4608	Score: 2.5	PGSC0003DMG401011679|PGSC0003DMT400030493
>t0000209_4608	Score: 2.5	PGSC0003DMG400008403|PGSC0003DMT400021661
>t0000209_4608	Score: 2.0	PGSC0003DMG402015209|PGSC0003DMT400039329
>t0000209_4608	Score: 2.5	PGSC0003DMG400012844|PGSC0003DMT400033425
>t0000209_4608	Score: 2.5	PGSC0003DMG400019415|PGSC0003DMT400049957
>t0000209_4608	Score: 2.5	PGSC0003DMG400023318|PGSC0003DMT400059934
>t0000209_4608	Score: 2.5	PGSC0003DMG400027414|PGSC0003DMT400070538
>t0000209_4608	Score: 2.5	PGSC0003DMG400024337|PGSC0003DMT400062549
>t0000209_4608	Score: 2.5	PGSC0003DMG400023907|PGSC0003DMT400061431
>t0000209_4608	Score: 1.5	PGSC0003DMG400023907|PGSC0003DMT400061431
>t0000209_4608	Score: 2.5	PGSC0003DMG400027809|PGSC0003DMT400071472
>t0000209_4608	Score: 1.5	PGSC0003DMG400030017|PGSC0003DMT400077180
>t0000209_4608	Score: 2.5	PGSC0003DMG400027414|PGSC0003DMT400070535
>t0000209_4608	Score: 2.5	PGSC0003DMG400023907|PGSC0003DMT400061432
>t0000209_4608	Score: 1.5	PGSC0003DMG400023907|PGSC0003DMT400061432
>t0000209_4608	Score: 2.5	PGSC0003DMG400027809|PGSC0003DMT400071473
>t0000209_4608	Score: 2.5	PGSC0003DMG400041873|PGSC0003DMT400092302
>t0000212_4531	Score: 1.8	PGSC0003DMG402003570|PGSC0003DMT400009200
>t0000212_4531	Score: 2.5	PGSC0003DMG400015491|PGSC0003DMT400040046
>t0000212_4531	Score: 2.5	PGSC0003DMG400015491|PGSC0003DMT400040047
>t0000212_4531	Score: 2.5	PGSC0003DMG400015491|PGSC0003DMT400040050
>t0000212_4531	Score: 2.5	PGSC0003DMG400028602|PGSC0003DMT400073635
>t0000212_4531	Score: 2.5	PGSC0003DMG400028602|PGSC0003DMT400073634
>t0000212_4531	Score: 2.5	PGSC0003DMG400028602|PGSC0003DMT400073633
>t0000214_4512	Score: 2.0	PGSC0003DMG400003551|PGSC0003DMT400009133
>t0000214_4512	Score: 2.2	PGSC0003DMG400028078|PGSC0003DMT400072154
>t0000214_4512	Score: 2.2	PGSC0003DMG400028078|PGSC0003DMT400072151
>t0000214_4512	Score: 2.2	PGSC0003DMG400028078|PGSC0003DMT400072152
>t0000214_4512	Score: 2.0	PGSC0003DMG400030161|PGSC0003DMT400077564
>t0000214_4512	Score: 2.2	PGSC0003DMG400028078|PGSC0003DMT400072155
>t0000214_4512	Score: 2.2	PGSC0003DMG400028078|PGSC0003DMT400072153
>t0000216_4492	Score: 2.0	PGSC0003DMG400006171|PGSC0003DMT400015787
>t0000216_4492	Score: 2.0	PGSC0003DMG400006171|PGSC0003DMT400015786
>t0000216_4492	Score: 2.2	PGSC0003DMG400034108|PGSC0003DMT400084513
>t0000217_4477	Score: 2.5	PGSC0003DMG401023644|PGSC0003DMT400060796
>t0000218_4469	Score: 2.5	PGSC0003DMG400012490|PGSC0003DMT400032516
>t0000218_4469	Score: 2.5	PGSC0003DMG400012489|PGSC0003DMT400032514
>t0000220_4459	Score: 2.5	PGSC0003DMG400018148|PGSC0003DMT400046736
>t0000220_4459	Score: 2.5	PGSC0003DMG400021125|PGSC0003DMT400054422
>t0000220_4459	Score: 2.5	PGSC0003DMG400018148|PGSC0003DMT400046738
>t0000220_4459	Score: 2.5	PGSC0003DMG400021125|PGSC0003DMT400054420
>t0000220_4459	Score: 2.5	PGSC0003DMG400021125|PGSC0003DMT400054421
>t0000220_4459	Score: 2.2	PGSC0003DMG400042160|PGSC0003DMT400092589
>t0000220_4459	Score: 2.5	PGSC0003DMG400041737|PGSC0003DMT400092166
>t0000221_4458	Score: 2.5	PGSC0003DMG400014029|PGSC0003DMT400036430
>t0000221_4458	Score: 2.5	PGSC0003DMG400012203|PGSC0003DMT400031805
>t0000223_4434	Score: 2.5	PGSC0003DMG400014967|PGSC0003DMT400038726
>t0000227_4371	Score: 2.5	PGSC0003DMG400009054|PGSC0003DMT400023380
>t0000227_4371	Score: 2.5	PGSC0003DMG400009054|PGSC0003DMT400023383
>t0000227_4371	Score: 2.5	PGSC0003DMG400009054|PGSC0003DMT400023381
>t0000229_4347	Score: 2.5	EPlSTUG00000001802|EPlSTUT00000001802
>t0000229_4347	Score: 2.0	PGSC0003DMG401023885|PGSC0003DMT400061377
>t0000229_4347	Score: 2.0	PGSC0003DMG401023885|PGSC0003DMT400061376
>t0000232_4332	Score: 2.5	PGSC0003DMG400003245|PGSC0003DMT400008406
>t0000232_4332	Score: 2.5	PGSC0003DMG400009054|PGSC0003DMT400023380
>t0000232_4332	Score: 2.5	PGSC0003DMG400009054|PGSC0003DMT400023383
>t0000232_4332	Score: 2.5	PGSC0003DMG400009054|PGSC0003DMT400023381
>t0000232_4332	Score: 2.5	PGSC0003DMG400037833|PGSC0003DMT400088262
>t0000234_4318	Score: 2.5	PGSC0003DMG400003113|PGSC0003DMT400008069
>t0000234_4318	Score: 2.5	PGSC0003DMG400003113|PGSC0003DMT400008068
>t0000234_4318	Score: 2.5	PGSC0003DMG400003113|PGSC0003DMT400008065
>t0000234_4318	Score: 2.5	PGSC0003DMG400003113|PGSC0003DMT400008066
>t0000234_4318	Score: 2.5	PGSC0003DMG400003113|PGSC0003DMT400008067
>t0000234_4318	Score: 2.0	PGSC0003DMG400016253|PGSC0003DMT400041887
>t0000234_4318	Score: 2.5	PGSC0003DMG401019681|PGSC0003DMT400050673
>t0000234_4318	Score: 2.5	PGSC0003DMG402019681|PGSC0003DMT400050671
>t0000235_4307	Score: 2.2	PGSC0003DMG400004820|PGSC0003DMT400012293
>t0000235_4307	Score: 2.2	PGSC0003DMG400004820|PGSC0003DMT400012290
>t0000235_4307	Score: 2.2	PGSC0003DMG400004820|PGSC0003DMT400012294
>t0000235_4307	Score: 2.2	PGSC0003DMG400004820|PGSC0003DMT400012291
>t0000235_4307	Score: 2.2	PGSC0003DMG400004820|PGSC0003DMT400012295
>t0000235_4307	Score: 2.2	PGSC0003DMG400004820|PGSC0003DMT400012292
>t0000235_4307	Score: 2.2	PGSC0003DMG400019117|PGSC0003DMT400049181
>t0000241_4187	Score: 2.2	PGSC0003DMG400000377|PGSC0003DMT400001020
>t0000241_4187	Score: 2.2	PGSC0003DMG400000377|PGSC0003DMT400001019
>t0000241_4187	Score: 2.5	PGSC0003DMG400030402|PGSC0003DMT400078157
>t0000241_4187	Score: 2.5	PGSC0003DMG400029761|PGSC0003DMT400076547
>t0000241_4187	Score: 2.5	PGSC0003DMG400030403|PGSC0003DMT400078158
>t0000241_4187	Score: 2.0	PGSC0003DMG400029999|PGSC0003DMT400077141
>t0000243_4172	Score: 2.5	PGSC0003DMG400000067|PGSC0003DMT400000224
>t0000243_4172	Score: 2.5	PGSC0003DMG400000067|PGSC0003DMT400000222
>t0000243_4172	Score: 2.5	PGSC0003DMG400013890|PGSC0003DMT400036069
>t0000243_4172	Score: 2.5	PGSC0003DMG400013890|PGSC0003DMT400036067
>t0000243_4172	Score: 2.5	PGSC0003DMG400014328|PGSC0003DMT400037158
>t0000243_4172	Score: 2.5	PGSC0003DMG400013890|PGSC0003DMT400036066
>t0000243_4172	Score: 2.5	PGSC0003DMG400018095|PGSC0003DMT400046604
>t0000243_4172	Score: 2.5	PGSC0003DMG402025696|PGSC0003DMT400066006
>t0000244_4170	Score: 2.5	PGSC0003DMG400027876|PGSC0003DMT400071661
>t0000244_4170	Score: 2.5	PGSC0003DMG400027876|PGSC0003DMT400071662
>t0000245_4161	Score: 2.5	PGSC0003DMG400003910|PGSC0003DMT400009988
>t0000245_4161	Score: 2.2	PGSC0003DMG401016989|PGSC0003DMT400043766
>t0000245_4161	Score: 2.2	PGSC0003DMG400017926|PGSC0003DMT400046189
>t0000245_4161	Score: 2.0	PGSC0003DMG402030235|PGSC0003DMT400077717
>t0000245_4161	Score: 2.0	PGSC0003DMG402030236|PGSC0003DMT400077723
>t0000248_4105	Score: 2.5	PGSC0003DMG400003564|PGSC0003DMT400009177
>t0000248_4105	Score: 2.5	PGSC0003DMG400003564|PGSC0003DMT400009180
>t0000248_4105	Score: 2.5	PGSC0003DMG400003564|PGSC0003DMT400009188
>t0000248_4105	Score: 2.5	PGSC0003DMG400010476|PGSC0003DMT400027156
>t0000248_4105	Score: 2.5	PGSC0003DMG400010476|PGSC0003DMT400027155
>t0000248_4105	Score: 2.5	PGSC0003DMG401020415|PGSC0003DMT400052594
>t0000248_4105	Score: 2.5	PGSC0003DMG402021989|PGSC0003DMT400056559
>t0000248_4105	Score: 2.5	PGSC0003DMG401020415|PGSC0003DMT400052593
>t0000248_4105	Score: 2.5	PGSC0003DMG402021989|PGSC0003DMT400056560
>t0000248_4105	Score: 2.5	PGSC0003DMG401020415|PGSC0003DMT400052595
>t0000249_4090	Score: 2.5	PGSC0003DMG400000457|PGSC0003DMT400001216
>t0000249_4090	Score: 2.2	PGSC0003DMG402003570|PGSC0003DMT400009200
>t0000249_4090	Score: 2.5	PGSC0003DMG401018450|PGSC0003DMT400047482
>t0000249_4090	Score: 2.5	PGSC0003DMG400015491|PGSC0003DMT400040046
>t0000249_4090	Score: 2.2	PGSC0003DMG400018936|PGSC0003DMT400048725
>t0000249_4090	Score: 2.5	PGSC0003DMG400015491|PGSC0003DMT400040047
>t0000249_4090	Score: 2.5	PGSC0003DMG400015491|PGSC0003DMT400040050
>t0000250_4066	Score: 2.5	PGSC0003DMG401006074|PGSC0003DMT400015557
>t0000250_4066	Score: 2.5	PGSC0003DMG400009054|PGSC0003DMT400023380
>t0000250_4066	Score: 2.5	PGSC0003DMG400009054|PGSC0003DMT400023383
>t0000250_4066	Score: 2.5	PGSC0003DMG400009054|PGSC0003DMT400023381
>t0000251_4062	Score: 2.0	PGSC0003DMG400000161|PGSC0003DMT400000471
>t0000251_4062	Score: 2.0	PGSC0003DMG400005075|PGSC0003DMT400013025
>t0000251_4062	Score: 2.0	PGSC0003DMG400005075|PGSC0003DMT400013024
>t0000251_4062	Score: 2.5	PGSC0003DMG400012887|PGSC0003DMT400033558
>t0000251_4062	Score: 2.5	PGSC0003DMG400011658|PGSC0003DMT400030441
>t0000251_4062	Score: 2.5	PGSC0003DMG400011658|PGSC0003DMT400030440
>t0000251_4062	Score: 2.5	PGSC0003DMG400019449|PGSC0003DMT400050077
>t0000251_4062	Score: 2.5	PGSC0003DMG400016479|PGSC0003DMT400042494
>t0000251_4062	Score: 2.5	PGSC0003DMG400027925|PGSC0003DMT400071784
>t0000252_4055	Score: 2.0	PGSC0003DMG400008736|PGSC0003DMT400022536
>t0000252_4055	Score: 2.5	PGSC0003DMG400013171|PGSC0003DMT400034262
>t0000252_4055	Score: 2.0	PGSC0003DMG400008736|PGSC0003DMT400022537
>t0000252_4055	Score: 2.5	PGSC0003DMG400019393|PGSC0003DMT400049904
>t0000252_4055	Score: 2.2	PGSC0003DMG400022923|PGSC0003DMT400059023
>t0000252_4055	Score: 2.5	PGSC0003DMG400019393|PGSC0003DMT400049905
>t0000252_4055	Score: 2.5	PGSC0003DMG400023846|PGSC0003DMT400061265
>t0000252_4055	Score: 2.5	PGSC0003DMG401028489|PGSC0003DMT400073309
>t0000252_4055	Score: 2.5	PGSC0003DMG401028489|PGSC0003DMT400073310
>t0000253_4047	Score: 2.5	PGSC0003DMG400005462|PGSC0003DMT400013953
>t0000253_4047	Score: 2.5	PGSC0003DMG400003849|PGSC0003DMT400009831
>t0000253_4047	Score: 2.5	PGSC0003DMG401003505|PGSC0003DMT400009004
>t0000253_4047	Score: 2.5	PGSC0003DMG400009927|PGSC0003DMT400025711
>t0000253_4047	Score: 2.5	PGSC0003DMG401021671|PGSC0003DMT400055799
>t0000253_4047	Score: 2.0	PGSC0003DMG400022394|PGSC0003DMT400057680
>t0000253_4047	Score: 2.5	PGSC0003DMG400016160|PGSC0003DMT400041684
>t0000253_4047	Score: 2.5	PGSC0003DMG400016376|PGSC0003DMT400042206
>t0000253_4047	Score: 2.5	PGSC0003DMG400017008|PGSC0003DMT400043828
>t0000253_4047	Score: 2.5	PGSC0003DMG400018733|PGSC0003DMT400048223
>t0000253_4047	Score: 2.5	PGSC0003DMG400023333|PGSC0003DMT400059966
>t0000253_4047	Score: 2.5	PGSC0003DMG400024764|PGSC0003DMT400063717
>t0000253_4047	Score: 2.5	PGSC0003DMG400024764|PGSC0003DMT400063716
>t0000253_4047	Score: 2.5	PGSC0003DMG400029584|PGSC0003DMT400076080
>t0000253_4047	Score: 2.5	PGSC0003DMG400024764|PGSC0003DMT400063715
>t0000253_4047	Score: 2.2	PGSC0003DMG400037246|PGSC0003DMT400087675
>t0000254_4042	Score: 2.2	PGSC0003DMG400001197|PGSC0003DMT400003021
>t0000254_4042	Score: 2.5	PGSC0003DMG401005842|PGSC0003DMT400014965
>t0000254_4042	Score: 2.5	PGSC0003DMG400038597|PGSC0003DMT400089026
>t0000255_4024	Score: 2.5	PGSC0003DMG400001249|PGSC0003DMT400003158
>t0000255_4024	Score: 2.2	PGSC0003DMG400012570|PGSC0003DMT400032736
>t0000255_4024	Score: 2.5	PGSC0003DMG400012246|PGSC0003DMT400031922
>t0000255_4024	Score: 2.2	PGSC0003DMG400011070|PGSC0003DMT400028762
>t0000255_4024	Score: 2.5	PGSC0003DMG400042579|PGSC0003DMT400093008
>t0000256_4015	Score: 2.5	PGSC0003DMG402000361|PGSC0003DMT400000981
>t0000256_4015	Score: 2.5	PGSC0003DMG402000361|PGSC0003DMT400000974
>t0000256_4015	Score: 2.0	PGSC0003DMG400039452|PGSC0003DMT400089881
>t0000257_3999	Score: 2.5	PGSC0003DMG400011972|PGSC0003DMT400031242
>t0000257_3999	Score: 2.5	PGSC0003DMG400012127|PGSC0003DMT400031615
>t0000257_3999	Score: 2.5	PGSC0003DMG400012127|PGSC0003DMT400031614
>t0000257_3999	Score: 2.5	PGSC0003DMG400012127|PGSC0003DMT400031608
>t0000257_3999	Score: 2.5	PGSC0003DMG400012127|PGSC0003DMT400031612
>t0000257_3999	Score: 2.5	PGSC0003DMG400012127|PGSC0003DMT400031616
>t0000257_3999	Score: 2.5	PGSC0003DMG400012127|PGSC0003DMT400031613
>t0000257_3999	Score: 2.5	PGSC0003DMG400011070|PGSC0003DMT400028762
>t0000257_3999	Score: 2.2	PGSC0003DMG400008292|PGSC0003DMT400021372
>t0000257_3999	Score: 2.5	PGSC0003DMG400012303|PGSC0003DMT400032056
>t0000257_3999	Score: 2.5	PGSC0003DMG400028158|PGSC0003DMT400072352
>t0000257_3999	Score: 2.5	PGSC0003DMG400028158|PGSC0003DMT400072353
>t0000257_3999	Score: 2.5	PGSC0003DMG400024458|PGSC0003DMT400062829
>t0000259_3936	Score: 2.5	PGSC0003DMG400003514|PGSC0003DMT400009045
>t0000259_3936	Score: 2.5	PGSC0003DMG400003514|PGSC0003DMT400009046
>t0000260_3928	Score: 2.5	PGSC0003DMG400001069|PGSC0003DMT400002754
>t0000260_3928	Score: 2.5	PGSC0003DMG400001069|PGSC0003DMT400002752
>t0000260_3928	Score: 2.5	PGSC0003DMG400001069|PGSC0003DMT400002759
>t0000260_3928	Score: 2.5	PGSC0003DMG400001069|PGSC0003DMT400002760
>t0000260_3928	Score: 2.5	PGSC0003DMG400001069|PGSC0003DMT400002756
>t0000260_3928	Score: 2.5	PGSC0003DMG400001069|PGSC0003DMT400002758
>t0000260_3928	Score: 2.5	PGSC0003DMG400001069|PGSC0003DMT400002753
>t0000260_3928	Score: 2.5	PGSC0003DMG400001069|PGSC0003DMT400002761
>t0000260_3928	Score: 2.5	PGSC0003DMG400001069|PGSC0003DMT400002757
>t0000260_3928	Score: 2.5	PGSC0003DMG400001069|PGSC0003DMT400002755
>t0000260_3928	Score: 2.5	PGSC0003DMG400006217|PGSC0003DMT400015905
>t0000260_3928	Score: 2.2	PGSC0003DMG400004762|PGSC0003DMT400012151
>t0000260_3928	Score: 2.5	PGSC0003DMG400006217|PGSC0003DMT400015906
>t0000260_3928	Score: 2.2	PGSC0003DMG400004762|PGSC0003DMT400012152
>t0000260_3928	Score: 2.2	PGSC0003DMG400004762|PGSC0003DMT400012153
>t0000260_3928	Score: 2.5	PGSC0003DMG400007426|PGSC0003DMT400019198
>t0000260_3928	Score: 2.5	PGSC0003DMG400012686|PGSC0003DMT400033044
>t0000260_3928	Score: 2.5	PGSC0003DMG400010560|PGSC0003DMT400027385
>t0000260_3928	Score: 2.5	PGSC0003DMG400010560|PGSC0003DMT400027387
>t0000260_3928	Score: 2.5	PGSC0003DMG400007426|PGSC0003DMT400019201
>t0000260_3928	Score: 2.5	PGSC0003DMG400010560|PGSC0003DMT400027384
>t0000260_3928	Score: 2.5	PGSC0003DMG400007426|PGSC0003DMT400019199
>t0000260_3928	Score: 2.5	PGSC0003DMG400010560|PGSC0003DMT400027386
>t0000260_3928	Score: 2.5	PGSC0003DMG400007426|PGSC0003DMT400019200
>t0000260_3928	Score: 2.5	PGSC0003DMG400010560|PGSC0003DMT400027388
>t0000260_3928	Score: 2.5	PGSC0003DMG400015631|PGSC0003DMT400040371
>t0000260_3928	Score: 2.2	PGSC0003DMG400023698|PGSC0003DMT400060930
>t0000260_3928	Score: 2.2	PGSC0003DMG400023698|PGSC0003DMT400060931
>t0000260_3928	Score: 2.5	PGSC0003DMG400037616|PGSC0003DMT400088045
>t0000260_3928	Score: 2.2	PGSC0003DMG400034334|PGSC0003DMT400084763
>t0000264_3854	Score: 2.5	PGSC0003DMG400000915|PGSC0003DMT400002386
>t0000264_3854	Score: 2.5	PGSC0003DMG400046196|PGSC0003DMT400096625
>t0000266_3800	Score: 2.5	EPlSTUG00000000330|EPlSTUT00000000330
>t0000268_3771	Score: 2.5	PGSC0003DMG400008408|PGSC0003DMT400021673
>t0000268_3771	Score: 2.5	PGSC0003DMG400023520|PGSC0003DMT400060468
>t0000268_3771	Score: 2.5	PGSC0003DMG400023520|PGSC0003DMT400060467
>t0000268_3771	Score: 2.5	PGSC0003DMG400023520|PGSC0003DMT400060469
>t0000268_3771	Score: 2.5	PGSC0003DMG400017617|PGSC0003DMT400045404
>t0000270_3765	Score: 2.5	EPlSTUG00000004103|EPlSTUT00000004099
>t0000270_3765	Score: 2.5	PGSC0003DMG400031472|PGSC0003DMT400080803
>t0000271_3751	Score: 2.5	PGSC0003DMG401020085|PGSC0003DMT400051733
>t0000273_3739	Score: 2.2	PGSC0003DMG400003291|PGSC0003DMT400008507
>t0000273_3739	Score: 2.5	PGSC0003DMG400012287|PGSC0003DMT400032024
>t0000273_3739	Score: 2.5	PGSC0003DMG400012287|PGSC0003DMT400032026
>t0000273_3739	Score: 2.5	PGSC0003DMG400009156|PGSC0003DMT400023666
>t0000273_3739	Score: 2.5	PGSC0003DMG400012287|PGSC0003DMT400032025
>t0000273_3739	Score: 2.5	PGSC0003DMG400009503|PGSC0003DMT400024580
>t0000273_3739	Score: 2.5	PGSC0003DMG400009156|PGSC0003DMT400023667
>t0000273_3739	Score: 2.5	PGSC0003DMG400009156|PGSC0003DMT400023665
>t0000273_3739	Score: 2.5	PGSC0003DMG400018224|PGSC0003DMT400046930
>t0000273_3739	Score: 2.5	PGSC0003DMG400030954|PGSC0003DMT400079498
>t0000273_3739	Score: 2.2	PGSC0003DMG400025921|PGSC0003DMT400066706
>t0000273_3739	Score: 2.5	PGSC0003DMG400030954|PGSC0003DMT400079495
>t0000273_3739	Score: 2.5	PGSC0003DMG400033638|PGSC0003DMT400083873
>t0000273_3739	Score: 2.5	PGSC0003DMG400033638|PGSC0003DMT400083871
>t0000273_3739	Score: 2.5	PGSC0003DMG400046803|PGSC0003DMT400097232
>t0000273_3739	Score: 2.5	PGSC0003DMG400033638|PGSC0003DMT400083874
>t0000274_3736	Score: 2.2	PGSC0003DMG400002787|PGSC0003DMT400007203
>t0000274_3736	Score: 2.2	PGSC0003DMG400012543|PGSC0003DMT400032652
>t0000274_3736	Score: 2.5	PGSC0003DMG400023513|PGSC0003DMT400060451
>t0000274_3736	Score: 2.5	PGSC0003DMG400023513|PGSC0003DMT400060452
>t0000274_3736	Score: 2.5	PGSC0003DMG400023513|PGSC0003DMT400060450
>t0000274_3736	Score: 2.5	PGSC0003DMG400029592|PGSC0003DMT400076100
>t0000274_3736	Score: 2.5	PGSC0003DMG400035515|PGSC0003DMT400085944
>t0000274_3736	Score: 2.0	PGSC0003DMG400033572|PGSC0003DMT400083747
>t0000277_3689	Score: 2.0	PGSC0003DMG402004066|PGSC0003DMT400010409
>t0000277_3689	Score: 2.5	PGSC0003DMG400012567|PGSC0003DMT400032728
>t0000277_3689	Score: 2.0	PGSC0003DMG400010406|PGSC0003DMT400026980
>t0000279_3625	Score: 2.5	PGSC0003DMG400000079|PGSC0003DMT400000246
>t0000279_3625	Score: 2.5	PGSC0003DMG400000079|PGSC0003DMT400000247
>t0000279_3625	Score: 2.5	PGSC0003DMG400000079|PGSC0003DMT400000245
>t0000279_3625	Score: 2.5	PGSC0003DMG400002390|PGSC0003DMT400006143
>t0000279_3625	Score: 2.5	PGSC0003DMG400002613|PGSC0003DMT400006731
>t0000279_3625	Score: 2.0	PGSC0003DMG400001779|PGSC0003DMT400004463
>t0000279_3625	Score: 2.5	PGSC0003DMG400002390|PGSC0003DMT400006144
>t0000279_3625	Score: 2.5	PGSC0003DMG400002390|PGSC0003DMT400006145
>t0000279_3625	Score: 2.5	PGSC0003DMG400006166|PGSC0003DMT400015772
>t0000279_3625	Score: 2.2	PGSC0003DMG400006514|PGSC0003DMT400016669
>t0000279_3625	Score: 2.5	PGSC0003DMG400006166|PGSC0003DMT400015773
>t0000279_3625	Score: 2.5	PGSC0003DMG401007649|PGSC0003DMT400019789
>t0000279_3625	Score: 2.2	PGSC0003DMG400008642|PGSC0003DMT400022276
>t0000279_3625	Score: 2.0	PGSC0003DMG400020983|PGSC0003DMT400054108
>t0000279_3625	Score: 2.5	PGSC0003DMG401016989|PGSC0003DMT400043766
>t0000279_3625	Score: 2.5	PGSC0003DMG400026473|PGSC0003DMT400068065
>t0000279_3625	Score: 2.5	PGSC0003DMG400026473|PGSC0003DMT400068063
>t0000279_3625	Score: 2.0	PGSC0003DMG400024922|PGSC0003DMT400064148
>t0000279_3625	Score: 2.5	PGSC0003DMG400025535|PGSC0003DMT400065639
>t0000279_3625	Score: 2.5	PGSC0003DMG401030621|PGSC0003DMT400078694
>t0000279_3625	Score: 2.5	PGSC0003DMG400026473|PGSC0003DMT400068064
>t0000279_3625	Score: 2.5	PGSC0003DMG401030621|PGSC0003DMT400078695
>t0000279_3625	Score: 2.5	PGSC0003DMG400025535|PGSC0003DMT400065638
>t0000279_3625	Score: 2.5	PGSC0003DMG400047162|PGSC0003DMT400097591
>t0000281_3603	Score: 2.5	PGSC0003DMG400001069|PGSC0003DMT400002754
>t0000281_3603	Score: 2.5	PGSC0003DMG400001069|PGSC0003DMT400002752
>t0000281_3603	Score: 2.5	PGSC0003DMG400001069|PGSC0003DMT400002759
>t0000281_3603	Score: 2.5	PGSC0003DMG400001069|PGSC0003DMT400002760
>t0000281_3603	Score: 2.5	PGSC0003DMG400001069|PGSC0003DMT400002756
>t0000281_3603	Score: 2.5	PGSC0003DMG400001069|PGSC0003DMT400002758
>t0000281_3603	Score: 2.5	PGSC0003DMG400001069|PGSC0003DMT400002753
>t0000281_3603	Score: 2.5	PGSC0003DMG400000850|PGSC0003DMT400002220
>t0000281_3603	Score: 2.5	PGSC0003DMG400001069|PGSC0003DMT400002761
>t0000281_3603	Score: 2.5	PGSC0003DMG400001069|PGSC0003DMT400002757
>t0000281_3603	Score: 2.5	PGSC0003DMG400001069|PGSC0003DMT400002755
>t0000281_3603	Score: 2.5	PGSC0003DMG400004413|PGSC0003DMT400011272
>t0000281_3603	Score: 2.5	PGSC0003DMG400006217|PGSC0003DMT400015905
>t0000281_3603	Score: 2.5	PGSC0003DMG400006217|PGSC0003DMT400015906
>t0000281_3603	Score: 2.2	PGSC0003DMG400007426|PGSC0003DMT400019198
>t0000281_3603	Score: 2.5	PGSC0003DMG400010560|PGSC0003DMT400027385
>t0000281_3603	Score: 2.5	PGSC0003DMG400010560|PGSC0003DMT400027387
>t0000281_3603	Score: 2.2	PGSC0003DMG400007426|PGSC0003DMT400019201
>t0000281_3603	Score: 2.5	PGSC0003DMG400010560|PGSC0003DMT400027384
>t0000281_3603	Score: 2.2	PGSC0003DMG400007426|PGSC0003DMT400019199
>t0000281_3603	Score: 2.5	PGSC0003DMG400010560|PGSC0003DMT400027386
>t0000281_3603	Score: 2.2	PGSC0003DMG400007426|PGSC0003DMT400019200
>t0000281_3603	Score: 2.5	PGSC0003DMG400010560|PGSC0003DMT400027388
>t0000281_3603	Score: 2.5	PGSC0003DMG400012303|PGSC0003DMT400032056
>t0000281_3603	Score: 2.2	PGSC0003DMG400018464|PGSC0003DMT400047511
>t0000281_3603	Score: 2.2	PGSC0003DMG400018464|PGSC0003DMT400047509
>t0000281_3603	Score: 2.2	PGSC0003DMG400023698|PGSC0003DMT400060930
>t0000281_3603	Score: 2.2	PGSC0003DMG400018464|PGSC0003DMT400047512
>t0000281_3603	Score: 2.5	PGSC0003DMG400019915|PGSC0003DMT400051273
>t0000281_3603	Score: 2.2	PGSC0003DMG400018464|PGSC0003DMT400047510
>t0000281_3603	Score: 2.5	PGSC0003DMG400018943|PGSC0003DMT400048741
>t0000281_3603	Score: 2.2	PGSC0003DMG400023698|PGSC0003DMT400060931
>t0000281_3603	Score: 2.5	PGSC0003DMG400029443|PGSC0003DMT400075692
>t0000281_3603	Score: 2.0	PGSC0003DMG400037616|PGSC0003DMT400088045
>t0000281_3603	Score: 1.5	PGSC0003DMG400034334|PGSC0003DMT400084763
>t0000281_3603	Score: 2.5	PGSC0003DMG400046101|PGSC0003DMT400096530
>t0000283_3592	Score: 2.5	PGSC0003DMG400002865|PGSC0003DMT400007439
>t0000283_3592	Score: 2.5	PGSC0003DMG400002865|PGSC0003DMT400007440
>t0000283_3592	Score: 2.5	PGSC0003DMG400002865|PGSC0003DMT400007441
>t0000283_3592	Score: 1.5	PGSC0003DMG400014609|PGSC0003DMT400037876
>t0000283_3592	Score: 1.5	PGSC0003DMG400014609|PGSC0003DMT400037874
>t0000283_3592	Score: 2.0	PGSC0003DMG402015209|PGSC0003DMT400039329
>t0000283_3592	Score: 2.5	PGSC0003DMG400021098|PGSC0003DMT400054356
>t0000283_3592	Score: 2.5	PGSC0003DMG401021514|PGSC0003DMT400055411
>t0000283_3592	Score: 2.5	PGSC0003DMG400017291|PGSC0003DMT400044537
>t0000283_3592	Score: 2.5	PGSC0003DMG400023318|PGSC0003DMT400059934
>t0000283_3592	Score: 2.5	PGSC0003DMG401021514|PGSC0003DMT400055412
>t0000283_3592	Score: 2.5	PGSC0003DMG400023453|PGSC0003DMT400060294
>t0000283_3592	Score: 2.5	PGSC0003DMG400024286|PGSC0003DMT400062404
>t0000283_3592	Score: 2.2	PGSC0003DMG400023907|PGSC0003DMT400061431
>t0000283_3592	Score: 2.5	PGSC0003DMG400027809|PGSC0003DMT400071472
>t0000283_3592	Score: 2.0	PGSC0003DMG400026610|PGSC0003DMT400068427
>t0000283_3592	Score: 2.2	PGSC0003DMG400023907|PGSC0003DMT400061432
>t0000283_3592	Score: 2.5	PGSC0003DMG400027809|PGSC0003DMT400071473
>t0000289_3531	Score: 2.5	PGSC0003DMG400005112|PGSC0003DMT400013095
>t0000289_3531	Score: 2.5	PGSC0003DMG400014086|PGSC0003DMT400036552
>t0000289_3531	Score: 2.5	PGSC0003DMG400018344|PGSC0003DMT400047245
>t0000289_3531	Score: 2.5	PGSC0003DMG401018810|PGSC0003DMT400048424
>t0000289_3531	Score: 2.5	PGSC0003DMG400018344|PGSC0003DMT400047244
>t0000289_3531	Score: 2.5	PGSC0003DMG400025148|PGSC0003DMT400064740
>t0000290_3507	Score: 2.5	PGSC0003DMG402017089|PGSC0003DMT400044045
>t0000292_3487	Score: 2.2	PGSC0003DMG400011830|PGSC0003DMT400030876
>t0000292_3487	Score: 2.2	PGSC0003DMG400011830|PGSC0003DMT400030875
>t0000296_3439	Score: 2.5	PGSC0003DMG400004070|PGSC0003DMT400010420
>t0000296_3439	Score: 2.5	PGSC0003DMG400004070|PGSC0003DMT400010421
>t0000296_3439	Score: 1.8	PGSC0003DMG400011517|PGSC0003DMT400030010
>t0000296_3439	Score: 1.8	PGSC0003DMG401011526|PGSC0003DMT400030039
>t0000296_3439	Score: 2.2	PGSC0003DMG400011519|PGSC0003DMT400030016
>t0000296_3439	Score: 2.0	PGSC0003DMG400011523|PGSC0003DMT400030030
>t0000296_3439	Score: 1.8	PGSC0003DMG400011517|PGSC0003DMT400030011
>t0000296_3439	Score: 2.5	PGSC0003DMG400015127|PGSC0003DMT400039123
>t0000296_3439	Score: 2.0	PGSC0003DMG400011525|PGSC0003DMT400030034
>t0000296_3439	Score: 1.8	PGSC0003DMG400011527|PGSC0003DMT400030042
>t0000296_3439	Score: 2.2	PGSC0003DMG400029490|PGSC0003DMT400075850
>t0000296_3439	Score: 2.2	PGSC0003DMG400033029|PGSC0003DMT400083031
>t0000296_3439	Score: 2.2	PGSC0003DMG400033029|PGSC0003DMT400083027
>t0000296_3439	Score: 2.2	PGSC0003DMG400032578|PGSC0003DMT400082501
>t0000296_3439	Score: 2.2	PGSC0003DMG400033029|PGSC0003DMT400083030
>t0000296_3439	Score: 2.0	PGSC0003DMG400032582|PGSC0003DMT400082505
>t0000296_3439	Score: 2.2	PGSC0003DMG400033029|PGSC0003DMT400083028
>t0000296_3439	Score: 1.8	PGSC0003DMG400032584|PGSC0003DMT400082507
>t0000298_3425	Score: 2.5	EPlSTUG00000000330|EPlSTUT00000000330
>t0000298_3425	Score: 2.5	PGSC0003DMG402003815|PGSC0003DMT400009750
>t0000298_3425	Score: 1.5	PGSC0003DMG402011138|PGSC0003DMT400028929
>t0000298_3425	Score: 1.5	PGSC0003DMG402011138|PGSC0003DMT400028928
>t0000298_3425	Score: 1.5	PGSC0003DMG402011138|PGSC0003DMT400028930
>t0000301_3409	Score: 2.0	PGSC0003DMG400003401|PGSC0003DMT400008758
>t0000301_3409	Score: 2.5	PGSC0003DMG400021376|PGSC0003DMT400055088
>t0000301_3409	Score: 2.2	PGSC0003DMG400023410|PGSC0003DMT400060184
>t0000301_3409	Score: 2.2	PGSC0003DMG400015538|PGSC0003DMT400040160
>t0000301_3409	Score: 2.2	PGSC0003DMG400015538|PGSC0003DMT400040159
>t0000301_3409	Score: 2.2	PGSC0003DMG400015538|PGSC0003DMT400040161
>t0000301_3409	Score: 2.2	PGSC0003DMG400023410|PGSC0003DMT400060183
>t0000301_3409	Score: 2.5	PGSC0003DMG400046871|PGSC0003DMT400097300
>t0000301_3409	Score: 2.5	PGSC0003DMG400037252|PGSC0003DMT400087681
>t0000301_3409	Score: 2.5	PGSC0003DMG400034643|PGSC0003DMT400085072
>t0000303_3387	Score: 2.5	PGSC0003DMG401001383|PGSC0003DMT400003501
>t0000303_3387	Score: 2.5	PGSC0003DMG402005194|PGSC0003DMT400013313
>t0000304_3375	Score: 2.5	PGSC0003DMG401003998|PGSC0003DMT400010208
>t0000304_3375	Score: 2.5	PGSC0003DMG402003998|PGSC0003DMT400010207
>t0000304_3375	Score: 2.5	PGSC0003DMG401003998|PGSC0003DMT400010210
>t0000304_3375	Score: 2.5	PGSC0003DMG402003998|PGSC0003DMT400010206
>t0000304_3375	Score: 2.5	PGSC0003DMG401003998|PGSC0003DMT400010209
>t0000304_3375	Score: 2.5	PGSC0003DMG401020085|PGSC0003DMT400051733
>t0000305_3375	Score: 2.2	PGSC0003DMG402013020|PGSC0003DMT400033887
>t0000305_3375	Score: 2.5	PGSC0003DMG400007418|PGSC0003DMT400019171
>t0000305_3375	Score: 2.5	PGSC0003DMG400023790|PGSC0003DMT400061145
>t0000305_3375	Score: 2.5	PGSC0003DMG401027067|PGSC0003DMT400069625
>t0000305_3375	Score: 2.5	PGSC0003DMG400030502|PGSC0003DMT400078346
>t0000306_3372	Score: 2.5	PGSC0003DMG402018380|PGSC0003DMT400047320
>t0000306_3372	Score: 2.5	PGSC0003DMG400037775|PGSC0003DMT400088204
>t0000306_3372	Score: 2.5	PGSC0003DMG400045089|PGSC0003DMT400095518
>t0000307_3360	Score: 2.5	PGSC0003DMG400014086|PGSC0003DMT400036552
>t0000307_3360	Score: 2.2	PGSC0003DMG400019201|PGSC0003DMT400049422
>t0000310_3352	Score: 2.5	PGSC0003DMG400003527|PGSC0003DMT400009065
>t0000310_3352	Score: 2.5	PGSC0003DMG400003527|PGSC0003DMT400009064
>t0000310_3352	Score: 2.5	PGSC0003DMG400019218|PGSC0003DMT400049462
>t0000310_3352	Score: 2.5	PGSC0003DMG401021662|PGSC0003DMT400055777
>t0000310_3352	Score: 2.2	PGSC0003DMG400030497|PGSC0003DMT400078333
>t0000310_3352	Score: 2.2	PGSC0003DMG400030498|PGSC0003DMT400078334
>t0000310_3352	Score: 2.5	PGSC0003DMG400032107|PGSC0003DMT400081755
>t0000310_3352	Score: 2.5	PGSC0003DMG400032107|PGSC0003DMT400081757
>t0000310_3352	Score: 2.5	PGSC0003DMG400032107|PGSC0003DMT400081758
>t0000311_3341	Score: 2.0	PGSC0003DMG400017575|PGSC0003DMT400045311
>t0000311_3341	Score: 2.5	PGSC0003DMG400027536|PGSC0003DMT400070820
>t0000312_3341	Score: 2.5	EPlSTUG00000000330|EPlSTUT00000000330
>t0000312_3341	Score: 2.2	EPlSTUG00000002634|EPlSTUT00000002634
>t0000312_3341	Score: 2.5	PGSC0003DMG401004870|PGSC0003DMT400012446
>t0000312_3341	Score: 2.5	PGSC0003DMG401004870|PGSC0003DMT400012450
>t0000312_3341	Score: 2.5	PGSC0003DMG400008160|PGSC0003DMT400021076
>t0000312_3341	Score: 2.5	PGSC0003DMG400008160|PGSC0003DMT400021075
>t0000314_3330	Score: 2.5	PGSC0003DMG400014625|PGSC0003DMT400037915
>t0000314_3330	Score: 2.5	PGSC0003DMG400014625|PGSC0003DMT400037914
>t0000316_3327	Score: 2.5	PGSC0003DMG400019896|PGSC0003DMT400051231
>t0000316_3327	Score: 2.2	PGSC0003DMG400025190|PGSC0003DMT400064874
>t0000316_3327	Score: 2.2	PGSC0003DMG400025190|PGSC0003DMT400064876
>t0000316_3327	Score: 2.5	PGSC0003DMG400029169|PGSC0003DMT400075002
>t0000316_3327	Score: 2.2	PGSC0003DMG400025190|PGSC0003DMT400064875
>t0000318_3325	Score: 2.2	PGSC0003DMG400001747|PGSC0003DMT400004388
>t0000318_3325	Score: 2.5	PGSC0003DMG400002573|PGSC0003DMT400006609
>t0000318_3325	Score: 2.5	PGSC0003DMG400002573|PGSC0003DMT400006610
>t0000318_3325	Score: 2.2	PGSC0003DMG400001747|PGSC0003DMT400004389
>t0000318_3325	Score: 2.5	PGSC0003DMG400002573|PGSC0003DMT400006608
>t0000318_3325	Score: 2.2	PGSC0003DMG400002011|PGSC0003DMT400005083
>t0000318_3325	Score: 2.5	PGSC0003DMG400002573|PGSC0003DMT400006611
>t0000318_3325	Score: 2.2	PGSC0003DMG400002011|PGSC0003DMT400005082
>t0000318_3325	Score: 2.5	PGSC0003DMG400001789|PGSC0003DMT400004493
>t0000318_3325	Score: 2.2	PGSC0003DMG400001747|PGSC0003DMT400004390
>t0000318_3325	Score: 2.5	PGSC0003DMG400003648|PGSC0003DMT400009387
>t0000318_3325	Score: 2.5	PGSC0003DMG401016272|PGSC0003DMT400041948
>t0000318_3325	Score: 2.5	PGSC0003DMG400017534|PGSC0003DMT400045203
>t0000318_3325	Score: 2.5	PGSC0003DMG400020228|PGSC0003DMT400052114
>t0000318_3325	Score: 2.0	PGSC0003DMG400016376|PGSC0003DMT400042206
>t0000318_3325	Score: 1.8	PGSC0003DMG400017150|PGSC0003DMT400044180
>t0000318_3325	Score: 2.5	PGSC0003DMG400023907|PGSC0003DMT400061431
>t0000318_3325	Score: 2.5	PGSC0003DMG401024092|PGSC0003DMT400061908
>t0000318_3325	Score: 2.2	PGSC0003DMG400028462|PGSC0003DMT400073254
>t0000318_3325	Score: 2.5	PGSC0003DMG400023907|PGSC0003DMT400061432
>t0000318_3325	Score: 2.5	PGSC0003DMG400033055|PGSC0003DMT400083106
>t0000318_3325	Score: 2.5	PGSC0003DMG400037246|PGSC0003DMT400087675
>t0000318_3325	Score: 2.5	PGSC0003DMG400033071|PGSC0003DMT400083136
>t0000318_3325	Score: 2.5	PGSC0003DMG400033055|PGSC0003DMT400083105
>t0000318_3325	Score: 2.0	PGSC0003DMG400036682|PGSC0003DMT400087111
>t0000318_3325	Score: 2.5	PGSC0003DMG400033055|PGSC0003DMT400083103
>t0000319_3306	Score: 2.5	PGSC0003DMG400009152|PGSC0003DMT400023649
>t0000319_3306	Score: 2.5	PGSC0003DMG400009152|PGSC0003DMT400023651
>t0000319_3306	Score: 2.5	PGSC0003DMG400009152|PGSC0003DMT400023650
>t0000319_3306	Score: 2.5	PGSC0003DMG400015383|PGSC0003DMT400039803
>t0000319_3306	Score: 2.5	PGSC0003DMG400015383|PGSC0003DMT400039805
>t0000319_3306	Score: 2.5	PGSC0003DMG400018037|PGSC0003DMT400046466
>t0000319_3306	Score: 1.5	PGSC0003DMG400019735|PGSC0003DMT400050811
>t0000319_3306	Score: 2.5	PGSC0003DMG400031372|PGSC0003DMT400080565
>t0000320_3303	Score: 2.5	PGSC0003DMG400012068|PGSC0003DMT400031469
>t0000320_3303	Score: 2.0	PGSC0003DMG400028635|PGSC0003DMT400073715
>t0000320_3303	Score: 2.0	PGSC0003DMG400028635|PGSC0003DMT400073714
>t0000320_3303	Score: 2.5	PGSC0003DMG400036018|PGSC0003DMT400086447
>t0000324_3267	Score: 2.5	PGSC0003DMG400002506|PGSC0003DMT400006419
>t0000324_3267	Score: 2.5	PGSC0003DMG400021398|PGSC0003DMT400055140
>t0000324_3267	Score: 2.2	PGSC0003DMG403020585|PGSC0003DMT400053059
>t0000324_3267	Score: 2.2	PGSC0003DMG401020585|PGSC0003DMT400053056
>t0000324_3267	Score: 2.5	PGSC0003DMG400021398|PGSC0003DMT400055138
>t0000324_3267	Score: 2.5	PGSC0003DMG400022845|PGSC0003DMT400058793
>t0000324_3267	Score: 2.2	PGSC0003DMG402020585|PGSC0003DMT400053057
>t0000324_3267	Score: 2.5	PGSC0003DMG402016979|PGSC0003DMT400043720
>t0000324_3267	Score: 1.5	PGSC0003DMG400026516|PGSC0003DMT400068180
>t0000324_3267	Score: 2.5	PGSC0003DMG402030236|PGSC0003DMT400077723
>t0000325_3255	Score: 2.0	PGSC0003DMG400011830|PGSC0003DMT400030876
>t0000325_3255	Score: 2.0	PGSC0003DMG400011830|PGSC0003DMT400030875
>t0000327_3245	Score: 1.5	PGSC0003DMG402003567|PGSC0003DMT400009194
>t0000327_3245	Score: 2.5	PGSC0003DMG400014914|PGSC0003DMT400038606
>t0000327_3245	Score: 2.5	PGSC0003DMG400014914|PGSC0003DMT400038607
>t0000327_3245	Score: 2.5	PGSC0003DMG400022307|PGSC0003DMT400057446
>t0000327_3245	Score: 2.2	PGSC0003DMG400017411|PGSC0003DMT400044878
>t0000327_3245	Score: 2.2	PGSC0003DMG400017411|PGSC0003DMT400044879
>t0000327_3245	Score: 2.2	PGSC0003DMG400017411|PGSC0003DMT400044877
>t0000327_3245	Score: 2.5	PGSC0003DMG400024951|PGSC0003DMT400064220
>t0000327_3245	Score: 2.2	PGSC0003DMG400031347|PGSC0003DMT400080506
>t0000327_3245	Score: 2.5	PGSC0003DMG400024951|PGSC0003DMT400064219
>t0000327_3245	Score: 2.5	PGSC0003DMG400026516|PGSC0003DMT400068180
>t0000327_3245	Score: 2.2	PGSC0003DMG400031347|PGSC0003DMT400080505
>t0000327_3245	Score: 2.5	PGSC0003DMG400024951|PGSC0003DMT400064221
>t0000327_3245	Score: 2.2	PGSC0003DMG400031347|PGSC0003DMT400080507
>t0000327_3245	Score: 2.5	PGSC0003DMG400030163|PGSC0003DMT400077566
>t0000329_3244	Score: 2.5	PGSC0003DMG400020204|PGSC0003DMT400052054
>t0000329_3244	Score: 2.5	PGSC0003DMG400015681|PGSC0003DMT400040528
>t0000329_3244	Score: 2.5	PGSC0003DMG403015682|PGSC0003DMT400040535
>t0000329_3244	Score: 2.5	PGSC0003DMG400015681|PGSC0003DMT400040527
>t0000329_3244	Score: 2.0	PGSC0003DMG400025095|PGSC0003DMT400064580
>t0000329_3244	Score: 2.5	PGSC0003DMG400026504|PGSC0003DMT400068144
>t0000329_3244	Score: 2.5	PGSC0003DMG400026504|PGSC0003DMT400068145
>t0000330_3242	Score: 2.5	PGSC0003DMG400009753|PGSC0003DMT400025243
>t0000330_3242	Score: 2.5	PGSC0003DMG400012722|PGSC0003DMT400033133
>t0000330_3242	Score: 2.5	PGSC0003DMG400023671|PGSC0003DMT400060849
>t0000330_3242	Score: 1.8	PGSC0003DMG400031515|PGSC0003DMT400080914
>t0000331_3235	Score: 2.2	PGSC0003DMG400000307|PGSC0003DMT400000827
>t0000331_3235	Score: 2.2	PGSC0003DMG400019389|PGSC0003DMT400049898
>t0000331_3235	Score: 2.2	PGSC0003DMG401018810|PGSC0003DMT400048422
>t0000331_3235	Score: 2.5	PGSC0003DMG400017591|PGSC0003DMT400045334
>t0000331_3235	Score: 2.2	PGSC0003DMG401018810|PGSC0003DMT400048424
>t0000331_3235	Score: 2.2	PGSC0003DMG400025499|PGSC0003DMT400065539
>t0000331_3235	Score: 2.2	PGSC0003DMG400025499|PGSC0003DMT400065537
>t0000331_3235	Score: 2.2	PGSC0003DMG400025499|PGSC0003DMT400065534
>t0000331_3235	Score: 2.2	PGSC0003DMG400025499|PGSC0003DMT400065535
>t0000331_3235	Score: 2.5	PGSC0003DMG400030629|PGSC0003DMT400078713
>t0000331_3235	Score: 2.5	PGSC0003DMG400031867|PGSC0003DMT400081472
>t0000331_3235	Score: 2.2	PGSC0003DMG400025499|PGSC0003DMT400065538
>t0000331_3235	Score: 2.2	PGSC0003DMG400025499|PGSC0003DMT400065536
>t0000333_3233	Score: 2.2	PGSC0003DMG400006765|PGSC0003DMT400017392
>t0000333_3233	Score: 2.5	PGSC0003DMG400006183|PGSC0003DMT400015824
>t0000333_3233	Score: 2.2	PGSC0003DMG400006765|PGSC0003DMT400017391
>t0000333_3233	Score: 2.5	PGSC0003DMG400005244|PGSC0003DMT400013435
>t0000333_3233	Score: 2.5	PGSC0003DMG400006183|PGSC0003DMT400015823
>t0000333_3233	Score: 2.0	PGSC0003DMG400008307|PGSC0003DMT400021414
>t0000333_3233	Score: 2.5	PGSC0003DMG400011510|PGSC0003DMT400029992
>t0000333_3233	Score: 2.5	PGSC0003DMG400011510|PGSC0003DMT400029993
>t0000333_3233	Score: 2.5	PGSC0003DMG400011510|PGSC0003DMT400029991
>t0000333_3233	Score: 2.0	PGSC0003DMG400008307|PGSC0003DMT400021412
>t0000333_3233	Score: 2.5	PGSC0003DMG400015788|PGSC0003DMT400040832
>t0000333_3233	Score: 2.5	PGSC0003DMG400022264|PGSC0003DMT400057334
>t0000333_3233	Score: 2.5	PGSC0003DMG400015788|PGSC0003DMT400040834
>t0000333_3233	Score: 2.5	PGSC0003DMG400015788|PGSC0003DMT400040831
>t0000333_3233	Score: 2.2	PGSC0003DMG400020815|PGSC0003DMT400053659
>t0000333_3233	Score: 2.5	PGSC0003DMG400015788|PGSC0003DMT400040833
>t0000333_3233	Score: 2.5	PGSC0003DMG400030948|PGSC0003DMT400079482
>t0000333_3233	Score: 2.5	PGSC0003DMG400027384|PGSC0003DMT400070439
>t0000333_3233	Score: 2.5	PGSC0003DMG400027384|PGSC0003DMT400070437
>t0000333_3233	Score: 2.2	PGSC0003DMG401027501|PGSC0003DMT400070726
>t0000333_3233	Score: 2.2	PGSC0003DMG401027501|PGSC0003DMT400070728
>t0000333_3233	Score: 1.8	PGSC0003DMG400027263|PGSC0003DMT400070131
>t0000333_3233	Score: 2.5	PGSC0003DMG401025908|PGSC0003DMT400066676
>t0000333_3233	Score: 2.2	PGSC0003DMG400027797|PGSC0003DMT400071445
>t0000333_3233	Score: 2.2	PGSC0003DMG401027501|PGSC0003DMT400070731
>t0000333_3233	Score: 2.0	PGSC0003DMG400038013|PGSC0003DMT400088442
>t0000334_3224	Score: 2.5	PGSC0003DMG400000933|PGSC0003DMT400002451
>t0000334_3224	Score: 2.2	PGSC0003DMG400001632|PGSC0003DMT400004129
>t0000334_3224	Score: 2.5	PGSC0003DMG400006158|PGSC0003DMT400015760
>t0000334_3224	Score: 2.5	PGSC0003DMG400007010|PGSC0003DMT400018046
>t0000334_3224	Score: 2.2	PGSC0003DMG400010230|PGSC0003DMT400026503
>t0000334_3224	Score: 2.5	PGSC0003DMG400014914|PGSC0003DMT400038606
>t0000334_3224	Score: 2.5	PGSC0003DMG400011415|PGSC0003DMT400029685
>t0000334_3224	Score: 2.5	PGSC0003DMG400007488|PGSC0003DMT400019359
>t0000334_3224	Score: 2.5	PGSC0003DMG400014914|PGSC0003DMT400038607
>t0000334_3224	Score: 2.5	PGSC0003DMG400022655|PGSC0003DMT400058330
>t0000334_3224	Score: 2.2	PGSC0003DMG400019754|PGSC0003DMT400050853
>t0000334_3224	Score: 2.2	PGSC0003DMG400019754|PGSC0003DMT400050851
>t0000334_3224	Score: 2.0	PGSC0003DMG400023557|PGSC0003DMT400060554
>t0000334_3224	Score: 2.5	PGSC0003DMG400022655|PGSC0003DMT400058331
>t0000334_3224	Score: 2.5	PGSC0003DMG400022655|PGSC0003DMT400058329
>t0000334_3224	Score: 2.2	PGSC0003DMG400019754|PGSC0003DMT400050852
>t0000334_3224	Score: 2.5	PGSC0003DMG400031029|PGSC0003DMT400079670
>t0000334_3224	Score: 2.5	PGSC0003DMG400031029|PGSC0003DMT400079671
>t0000336_3189	Score: 2.0	PGSC0003DMG400003305|PGSC0003DMT400008547
>t0000336_3189	Score: 2.0	PGSC0003DMG400003305|PGSC0003DMT400008548
>t0000336_3189	Score: 2.2	PGSC0003DMG400016150|PGSC0003DMT400041660
>t0000336_3189	Score: 2.5	PGSC0003DMG400020937|PGSC0003DMT400053964
>t0000336_3189	Score: 2.2	PGSC0003DMG400016150|PGSC0003DMT400041658
>t0000336_3189	Score: 2.2	PGSC0003DMG400016150|PGSC0003DMT400041659
>t0000338_3170	Score: 2.0	PGSC0003DMG400012201|PGSC0003DMT400031803
>t0000338_3170	Score: 2.5	PGSC0003DMG400022291|PGSC0003DMT400057412
>t0000338_3170	Score: 2.5	PGSC0003DMG400022291|PGSC0003DMT400057411
>t0000338_3170	Score: 2.5	PGSC0003DMG400022291|PGSC0003DMT400057410
>t0000338_3170	Score: 2.2	PGSC0003DMG400029414|PGSC0003DMT400075620
>t0000338_3170	Score: 2.5	PGSC0003DMG400024138|PGSC0003DMT400062022
>t0000338_3170	Score: 2.2	PGSC0003DMG400028591|PGSC0003DMT400073599
>t0000338_3170	Score: 2.5	PGSC0003DMG400027845|PGSC0003DMT400071571
>t0000339_3169	Score: 2.0	PGSC0003DMG400004752|PGSC0003DMT400012104
>t0000339_3169	Score: 2.2	PGSC0003DMG400006427|PGSC0003DMT400016450
>t0000339_3169	Score: 2.5	PGSC0003DMG400012543|PGSC0003DMT400032653
>t0000339_3169	Score: 2.5	PGSC0003DMG400012934|PGSC0003DMT400033674
>t0000339_3169	Score: 2.5	PGSC0003DMG400019455|PGSC0003DMT400050096
>t0000339_3169	Score: 2.2	PGSC0003DMG400028931|PGSC0003DMT400074447
>t0000339_3169	Score: 2.2	PGSC0003DMG400037451|PGSC0003DMT400087880
>t0000340_3169	Score: 2.2	PGSC0003DMG400003123|PGSC0003DMT400008103
>t0000340_3169	Score: 2.5	PGSC0003DMG400006355|PGSC0003DMT400016264
>t0000340_3169	Score: 2.2	PGSC0003DMG400012012|PGSC0003DMT400031351
>t0000340_3169	Score: 2.5	PGSC0003DMG400018811|PGSC0003DMT400048435
>t0000340_3169	Score: 2.5	PGSC0003DMG400022136|PGSC0003DMT400056926
>t0000340_3169	Score: 2.5	PGSC0003DMG400018811|PGSC0003DMT400048434
>t0000340_3169	Score: 2.5	PGSC0003DMG400018539|PGSC0003DMT400047697
>t0000340_3169	Score: 2.5	PGSC0003DMG400018565|PGSC0003DMT400047759
>t0000340_3169	Score: 2.2	PGSC0003DMG400040623|PGSC0003DMT400091052
>t0000341_3167	Score: 2.2	PGSC0003DMG400005436|PGSC0003DMT400013893
>t0000341_3167	Score: 2.2	PGSC0003DMG400005436|PGSC0003DMT400013894
>t0000341_3167	Score: 2.5	PGSC0003DMG400014123|PGSC0003DMT400036626
>t0000341_3167	Score: 2.5	PGSC0003DMG400014485|PGSC0003DMT400037555
>t0000341_3167	Score: 2.5	PGSC0003DMG400010691|PGSC0003DMT400027765
>t0000341_3167	Score: 2.5	PGSC0003DMG400014123|PGSC0003DMT400036625
>t0000341_3167	Score: 2.0	PGSC0003DMG400015191|PGSC0003DMT400039282
>t0000341_3167	Score: 2.0	PGSC0003DMG400020256|PGSC0003DMT400052225
>t0000341_3167	Score: 2.5	PGSC0003DMG400026225|PGSC0003DMT400067462
>t0000341_3167	Score: 2.5	PGSC0003DMG400033650|PGSC0003DMT400083907
>t0000341_3167	Score: 2.5	PGSC0003DMG400033650|PGSC0003DMT400083908
>t0000341_3167	Score: 2.5	PGSC0003DMG400033650|PGSC0003DMT400083906
>t0000344_3155	Score: 2.5	PGSC0003DMG402017089|PGSC0003DMT400044045
>t0000345_3142	Score: 2.2	PGSC0003DMG400010630|PGSC0003DMT400027579
>t0000345_3142	Score: 2.5	PGSC0003DMG400009538|PGSC0003DMT400024648
>t0000345_3142	Score: 2.5	PGSC0003DMG400030620|PGSC0003DMT400078690
>t0000345_3142	Score: 2.5	PGSC0003DMG400030620|PGSC0003DMT400078693
>t0000346_3141	Score: 2.5	PGSC0003DMG401013020|PGSC0003DMT400033884
>t0000346_3141	Score: 2.2	PGSC0003DMG400017057|PGSC0003DMT400043950
>t0000346_3141	Score: 2.5	PGSC0003DMG400016824|PGSC0003DMT400043330
>t0000347_3133	Score: 2.5	PGSC0003DMG400001266|PGSC0003DMT400003203
>t0000347_3133	Score: 2.5	PGSC0003DMG400002200|PGSC0003DMT400005610
>t0000347_3133	Score: 2.5	PGSC0003DMG400002200|PGSC0003DMT400005611
>t0000347_3133	Score: 2.5	PGSC0003DMG400009156|PGSC0003DMT400023666
>t0000347_3133	Score: 2.5	PGSC0003DMG400015138|PGSC0003DMT400039153
>t0000347_3133	Score: 2.5	PGSC0003DMG400009503|PGSC0003DMT400024580
>t0000347_3133	Score: 2.5	PGSC0003DMG400009156|PGSC0003DMT400023667
>t0000347_3133	Score: 2.5	PGSC0003DMG400009156|PGSC0003DMT400023665
>t0000347_3133	Score: 2.5	PGSC0003DMG400018224|PGSC0003DMT400046930
>t0000347_3133	Score: 2.2	PGSC0003DMG400030134|PGSC0003DMT400077488
>t0000347_3133	Score: 2.5	PGSC0003DMG400029714|PGSC0003DMT400076410
>t0000347_3133	Score: 2.2	PGSC0003DMG400030134|PGSC0003DMT400077489
>t0000347_3133	Score: 2.2	PGSC0003DMG400033638|PGSC0003DMT400083873
>t0000347_3133	Score: 2.2	PGSC0003DMG400033638|PGSC0003DMT400083871
>t0000347_3133	Score: 2.2	PGSC0003DMG400046803|PGSC0003DMT400097232
>t0000347_3133	Score: 2.2	PGSC0003DMG400033638|PGSC0003DMT400083874
>t0000348_3108	Score: 2.5	PGSC0003DMG400002715|PGSC0003DMT400007026
>t0000349_3107	Score: 2.2	PGSC0003DMG400000307|PGSC0003DMT400000827
>t0000349_3107	Score: 2.2	PGSC0003DMG400000282|PGSC0003DMT400000764
>t0000349_3107	Score: 2.5	PGSC0003DMG400000404|PGSC0003DMT400001071
>t0000349_3107	Score: 2.2	PGSC0003DMG400019389|PGSC0003DMT400049898
>t0000349_3107	Score: 2.2	PGSC0003DMG400020818|PGSC0003DMT400053668
>t0000349_3107	Score: 2.0	PGSC0003DMG400035231|PGSC0003DMT400085660
>t0000350_3097	Score: 2.0	PGSC0003DMG400018638|PGSC0003DMT400047961
>t0000350_3097	Score: 2.0	PGSC0003DMG400018638|PGSC0003DMT400047958
>t0000350_3097	Score: 2.0	PGSC0003DMG400018638|PGSC0003DMT400047959
>t0000350_3097	Score: 2.5	PGSC0003DMG400016118|PGSC0003DMT400041585
>t0000350_3097	Score: 2.0	PGSC0003DMG400018638|PGSC0003DMT400047960
>t0000351_3093	Score: 2.5	PGSC0003DMG400006193|PGSC0003DMT400015849
>t0000351_3093	Score: 2.5	PGSC0003DMG400007947|PGSC0003DMT400020518
>t0000351_3093	Score: 2.5	PGSC0003DMG400007947|PGSC0003DMT400020517
>t0000351_3093	Score: 2.5	PGSC0003DMG400018271|PGSC0003DMT400047049
>t0000351_3093	Score: 2.5	PGSC0003DMG400016908|PGSC0003DMT400043544
>t0000351_3093	Score: 2.5	PGSC0003DMG402017089|PGSC0003DMT400044045
>t0000351_3093	Score: 2.5	PGSC0003DMG402017024|PGSC0003DMT400043863
>t0000351_3093	Score: 2.2	PGSC0003DMG400017216|PGSC0003DMT400044335
>t0000351_3093	Score: 2.5	PGSC0003DMG402027531|PGSC0003DMT400070813
>t0000351_3093	Score: 2.5	PGSC0003DMG400029792|PGSC0003DMT400076612
>t0000351_3093	Score: 2.5	PGSC0003DMG402027531|PGSC0003DMT400070812
>t0000351_3093	Score: 2.5	PGSC0003DMG400029792|PGSC0003DMT400076611
>t0000353_3068	Score: 2.5	PGSC0003DMG400007079|PGSC0003DMT400018237
>t0000353_3068	Score: 2.5	PGSC0003DMG401015175|PGSC0003DMT400039249
>t0000353_3068	Score: 2.2	PGSC0003DMG400013721|PGSC0003DMT400035672
>t0000353_3068	Score: 2.5	PGSC0003DMG401021514|PGSC0003DMT400055412
>t0000353_3068	Score: 2.0	PGSC0003DMG400022183|PGSC0003DMT400057099
>t0000353_3068	Score: 2.5	PGSC0003DMG400030072|PGSC0003DMT400077316
>t0000353_3068	Score: 2.5	PGSC0003DMG400026433|PGSC0003DMT400067982
>t0000353_3068	Score: 2.0	PGSC0003DMG400027555|PGSC0003DMT400070851
>t0000353_3068	Score: 2.5	PGSC0003DMG400030072|PGSC0003DMT400077317
>t0000353_3068	Score: 2.5	PGSC0003DMG400030072|PGSC0003DMT400077320
>t0000353_3068	Score: 2.5	PGSC0003DMG400030072|PGSC0003DMT400077319
>t0000353_3068	Score: 2.5	PGSC0003DMG400026433|PGSC0003DMT400067983
>t0000353_3068	Score: 2.5	PGSC0003DMG400030072|PGSC0003DMT400077321
>t0000353_3068	Score: 2.0	PGSC0003DMG400027555|PGSC0003DMT400070850
>t0000353_3068	Score: 2.5	PGSC0003DMG400026433|PGSC0003DMT400067981
>t0000353_3068	Score: 2.5	PGSC0003DMG400032511|PGSC0003DMT400082390
>t0000353_3068	Score: 2.5	PGSC0003DMG400040957|PGSC0003DMT400091386
>t0000353_3068	Score: 2.5	PGSC0003DMG400032511|PGSC0003DMT400082389
>t0000359_3033	Score: 2.2	PGSC0003DMG400001459|PGSC0003DMT400003710
>t0000359_3033	Score: 2.2	PGSC0003DMG400001459|PGSC0003DMT400003709
>t0000359_3033	Score: 2.5	PGSC0003DMG400010312|PGSC0003DMT400026690
>t0000359_3033	Score: 2.5	PGSC0003DMG400010312|PGSC0003DMT400026691
>t0000359_3033	Score: 2.5	PGSC0003DMG400010312|PGSC0003DMT400026692
>t0000359_3033	Score: 2.2	PGSC0003DMG400023555|PGSC0003DMT400060552
>t0000359_3033	Score: 2.5	PGSC0003DMG400027309|PGSC0003DMT400070239
>t0000359_3033	Score: 2.2	PGSC0003DMG400026917|PGSC0003DMT400069200
>t0000359_3033	Score: 2.5	PGSC0003DMG400044607|PGSC0003DMT400095036
>t0000362_3018	Score: 2.2	EPlSTUG00000002634|EPlSTUT00000002634
>t0000362_3018	Score: 2.5	PGSC0003DMG400009608|PGSC0003DMT400024853
>t0000362_3018	Score: 2.5	PGSC0003DMG400015467|PGSC0003DMT400039992
>t0000362_3018	Score: 2.5	PGSC0003DMG402027860|PGSC0003DMT400071614
>t0000362_3018	Score: 2.5	PGSC0003DMG400028315|PGSC0003DMT400072761
>t0000363_3001	Score: 2.5	PGSC0003DMG400002835|PGSC0003DMT400007376
>t0000363_3001	Score: 1.5	PGSC0003DMG400001896|PGSC0003DMT400004779
>t0000363_3001	Score: 2.5	PGSC0003DMG400002835|PGSC0003DMT400007377
>t0000363_3001	Score: 1.5	PGSC0003DMG400001896|PGSC0003DMT400004781
>t0000363_3001	Score: 1.5	PGSC0003DMG400001896|PGSC0003DMT400004780
>t0000363_3001	Score: 2.5	PGSC0003DMG400010265|PGSC0003DMT400026580
>t0000363_3001	Score: 2.5	PGSC0003DMG400010265|PGSC0003DMT400026581
>t0000363_3001	Score: 2.0	PGSC0003DMG400027803|PGSC0003DMT400071460
>t0000363_3001	Score: 2.0	PGSC0003DMG400027803|PGSC0003DMT400071458
>t0000363_3001	Score: 2.0	PGSC0003DMG400027803|PGSC0003DMT400071461
>t0000363_3001	Score: 2.0	PGSC0003DMG400027803|PGSC0003DMT400071459
>t0000363_3001	Score: 2.5	PGSC0003DMG400040873|PGSC0003DMT400091302
>t0000364_2998	Score: 2.5	PGSC0003DMG400010778|PGSC0003DMT400027971
>t0000364_2998	Score: 2.5	PGSC0003DMG400010778|PGSC0003DMT400027972
>t0000364_2998	Score: 2.2	PGSC0003DMG400022634|PGSC0003DMT400058294
>t0000364_2998	Score: 2.2	PGSC0003DMG400022634|PGSC0003DMT400058293
>t0000367_2981	Score: 2.5	PGSC0003DMG401000943|PGSC0003DMT400002472
>t0000367_2981	Score: 2.0	PGSC0003DMG400005065|PGSC0003DMT400013000
>t0000367_2981	Score: 2.2	PGSC0003DMG401004707|PGSC0003DMT400011993
>t0000367_2981	Score: 2.2	PGSC0003DMG400012621|PGSC0003DMT400032854
>t0000367_2981	Score: 2.5	PGSC0003DMG400008814|PGSC0003DMT400022725
>t0000367_2981	Score: 2.0	PGSC0003DMG400012011|PGSC0003DMT400031343
>t0000367_2981	Score: 2.5	PGSC0003DMG400008814|PGSC0003DMT400022726
>t0000367_2981	Score: 2.2	PGSC0003DMG400012621|PGSC0003DMT400032855
>t0000367_2981	Score: 2.5	PGSC0003DMG400013779|PGSC0003DMT400035801
>t0000367_2981	Score: 2.5	PGSC0003DMG400027427|PGSC0003DMT400070566
>t0000367_2981	Score: 2.2	PGSC0003DMG400026628|PGSC0003DMT400068481
>t0000367_2981	Score: 2.0	PGSC0003DMG400024728|PGSC0003DMT400063604
>t0000370_2961	Score: 1.5	EPlSTUG00000000883|EPlSTUT00000000883
>t0000370_2961	Score: 2.5	PGSC0003DMG400018479|PGSC0003DMT400047547
>t0000370_2961	Score: 2.5	PGSC0003DMG400018479|PGSC0003DMT400047546
>t0000370_2961	Score: 2.5	PGSC0003DMG400018479|PGSC0003DMT400047545
>t0000370_2961	Score: 2.5	PGSC0003DMG400021891|PGSC0003DMT400056346
>t0000370_2961	Score: 2.5	PGSC0003DMG400021347|PGSC0003DMT400055011
>t0000370_2961	Score: 2.5	PGSC0003DMG400021891|PGSC0003DMT400056345
>t0000370_2961	Score: 2.5	PGSC0003DMG400019804|PGSC0003DMT400051008
>t0000370_2961	Score: 2.5	PGSC0003DMG400015413|PGSC0003DMT400039856
>t0000370_2961	Score: 2.5	PGSC0003DMG400028533|PGSC0003DMT400073450
>t0000370_2961	Score: 2.5	PGSC0003DMG400025848|PGSC0003DMT400066517
>t0000370_2961	Score: 2.5	PGSC0003DMG400030599|PGSC0003DMT400078624
>t0000370_2961	Score: 2.5	PGSC0003DMG400023918|PGSC0003DMT400061466
>t0000370_2961	Score: 2.5	PGSC0003DMG400028533|PGSC0003DMT400073451
>t0000371_2952	Score: 1.5	EPlSTUG00000000569|EPlSTUT00000000569
>t0000371_2952	Score: 2.2	PGSC0003DMG400000728|PGSC0003DMT400001920
>t0000371_2952	Score: 2.2	PGSC0003DMG400000728|PGSC0003DMT400001921
>t0000371_2952	Score: 2.2	PGSC0003DMG400000728|PGSC0003DMT400001919
>t0000371_2952	Score: 2.2	PGSC0003DMG403004568|PGSC0003DMT400011606
>t0000371_2952	Score: 2.0	PGSC0003DMG400003629|PGSC0003DMT400009339
>t0000371_2952	Score: 2.5	PGSC0003DMG400004933|PGSC0003DMT400012616
>t0000371_2952	Score: 2.2	PGSC0003DMG403004568|PGSC0003DMT400011605
>t0000371_2952	Score: 2.5	PGSC0003DMG400006719|PGSC0003DMT400017239
>t0000371_2952	Score: 2.5	PGSC0003DMG400006719|PGSC0003DMT400017238
>t0000371_2952	Score: 2.0	PGSC0003DMG402013876|PGSC0003DMT400036029
>t0000371_2952	Score: 2.5	PGSC0003DMG403010943|PGSC0003DMT400028404
>t0000371_2952	Score: 2.5	PGSC0003DMG400014159|PGSC0003DMT400036714
>t0000371_2952	Score: 2.5	PGSC0003DMG402011117|PGSC0003DMT400028890
>t0000371_2952	Score: 2.5	PGSC0003DMG403010943|PGSC0003DMT400028402
>t0000371_2952	Score: 2.5	PGSC0003DMG400011048|PGSC0003DMT400028711
>t0000371_2952	Score: 2.5	PGSC0003DMG400011048|PGSC0003DMT400028709
>t0000371_2952	Score: 2.5	PGSC0003DMG401011117|PGSC0003DMT400028895
>t0000371_2952	Score: 2.5	PGSC0003DMG400008738|PGSC0003DMT400022542
>t0000371_2952	Score: 2.5	PGSC0003DMG404010943|PGSC0003DMT400028412
>t0000371_2952	Score: 2.5	PGSC0003DMG400011048|PGSC0003DMT400028710
>t0000371_2952	Score: 2.5	PGSC0003DMG404010943|PGSC0003DMT400028410
>t0000371_2952	Score: 2.5	PGSC0003DMG400014159|PGSC0003DMT400036711
>t0000371_2952	Score: 2.5	PGSC0003DMG401011117|PGSC0003DMT400028892
>t0000371_2952	Score: 2.5	PGSC0003DMG400014159|PGSC0003DMT400036713
>t0000371_2952	Score: 2.0	PGSC0003DMG400010234|PGSC0003DMT400026510
>t0000371_2952	Score: 2.5	PGSC0003DMG403010943|PGSC0003DMT400028403
>t0000371_2952	Score: 2.5	PGSC0003DMG400014159|PGSC0003DMT400036715
>t0000371_2952	Score: 2.5	PGSC0003DMG401011117|PGSC0003DMT400028894
>t0000371_2952	Score: 2.0	PGSC0003DMG402013876|PGSC0003DMT400036030
>t0000371_2952	Score: 2.2	PGSC0003DMG400014549|PGSC0003DMT400037714
>t0000371_2952	Score: 2.5	PGSC0003DMG400011108|PGSC0003DMT400028843
>t0000371_2952	Score: 2.5	PGSC0003DMG400009156|PGSC0003DMT400023665
>t0000371_2952	Score: 2.0	PGSC0003DMG400009180|PGSC0003DMT400023732
>t0000371_2952	Score: 2.5	PGSC0003DMG401011117|PGSC0003DMT400028893
>t0000371_2952	Score: 2.5	PGSC0003DMG404010943|PGSC0003DMT400028411
>t0000371_2952	Score: 2.5	PGSC0003DMG403010943|PGSC0003DMT400028400
>t0000371_2952	Score: 2.0	PGSC0003DMG400010234|PGSC0003DMT400026509
>t0000371_2952	Score: 2.5	PGSC0003DMG401011117|PGSC0003DMT400028891
>t0000371_2952	Score: 2.5	PGSC0003DMG400009156|PGSC0003DMT400023670
>t0000371_2952	Score: 2.5	PGSC0003DMG400014159|PGSC0003DMT400036712
>t0000371_2952	Score: 2.5	PGSC0003DMG400019084|PGSC0003DMT400049106
>t0000371_2952	Score: 2.5	PGSC0003DMG400016236|PGSC0003DMT400041844
>t0000371_2952	Score: 2.5	PGSC0003DMG400023473|PGSC0003DMT400060346
>t0000371_2952	Score: 2.5	PGSC0003DMG400023473|PGSC0003DMT400060344
>t0000371_2952	Score: 2.2	PGSC0003DMG402021159|PGSC0003DMT400054515
>t0000371_2952	Score: 2.5	PGSC0003DMG400021864|PGSC0003DMT400056269
>t0000371_2952	Score: 2.5	PGSC0003DMG400016892|PGSC0003DMT400043510
>t0000371_2952	Score: 1.8	PGSC0003DMG400019687|PGSC0003DMT400050688
>t0000371_2952	Score: 2.5	PGSC0003DMG400023473|PGSC0003DMT400060345
>t0000371_2952	Score: 2.0	PGSC0003DMG400023271|PGSC0003DMT400059831
>t0000371_2952	Score: 2.5	PGSC0003DMG400023473|PGSC0003DMT400060343
>t0000371_2952	Score: 2.5	PGSC0003DMG402028489|PGSC0003DMT400073311
>t0000371_2952	Score: 2.5	PGSC0003DMG400028001|PGSC0003DMT400071966
>t0000371_2952	Score: 2.5	PGSC0003DMG400030079|PGSC0003DMT400077337
>t0000371_2952	Score: 2.5	PGSC0003DMG402028489|PGSC0003DMT400073313
>t0000371_2952	Score: 2.2	PGSC0003DMG402030570|PGSC0003DMT400078536
>t0000371_2952	Score: 2.2	PGSC0003DMG400027868|PGSC0003DMT400071640
>t0000371_2952	Score: 2.2	PGSC0003DMG402030570|PGSC0003DMT400078535
>t0000371_2952	Score: 2.2	PGSC0003DMG402030570|PGSC0003DMT400078537
>t0000371_2952	Score: 2.2	PGSC0003DMG400027517|PGSC0003DMT400070773
>t0000371_2952	Score: 2.5	PGSC0003DMG402028489|PGSC0003DMT400073312
>t0000371_2952	Score: 2.5	PGSC0003DMG400028001|PGSC0003DMT400071965
>t0000371_2952	Score: 2.5	PGSC0003DMG400023984|PGSC0003DMT400061610
>t0000371_2952	Score: 2.5	PGSC0003DMG402028489|PGSC0003DMT400073314
>t0000371_2952	Score: 2.5	PGSC0003DMG402027016|PGSC0003DMT400069495
>t0000371_2952	Score: 2.5	PGSC0003DMG400025977|PGSC0003DMT400066812
>t0000371_2952	Score: 2.2	PGSC0003DMG400025404|PGSC0003DMT400065360
>t0000371_2952	Score: 2.5	PGSC0003DMG400025977|PGSC0003DMT400066810
>t0000371_2952	Score: 2.5	PGSC0003DMG400028001|PGSC0003DMT400071967
>t0000371_2952	Score: 2.2	PGSC0003DMG402030570|PGSC0003DMT400078538
>t0000371_2952	Score: 2.2	PGSC0003DMG400024802|PGSC0003DMT400063803
>t0000371_2952	Score: 2.5	PGSC0003DMG400023984|PGSC0003DMT400061611
>t0000373_2939	Score: 2.5	PGSC0003DMG400000256|PGSC0003DMT400000705
>t0000373_2939	Score: 2.0	PGSC0003DMG400014764|PGSC0003DMT400038271
>t0000373_2939	Score: 2.0	PGSC0003DMG400022378|PGSC0003DMT400057631
>t0000373_2939	Score: 2.5	PGSC0003DMG400043060|PGSC0003DMT400093489
>t0000373_2939	Score: 2.2	PGSC0003DMG400033907|PGSC0003DMT400084278
>t0000374_2927	Score: 2.5	PGSC0003DMG401002094|PGSC0003DMT400005364
>t0000374_2927	Score: 2.5	PGSC0003DMG401002094|PGSC0003DMT400005365
>t0000374_2927	Score: 2.5	PGSC0003DMG400002000|PGSC0003DMT400005065
>t0000374_2927	Score: 2.5	PGSC0003DMG401002094|PGSC0003DMT400005366
>t0000374_2927	Score: 2.5	PGSC0003DMG401002094|PGSC0003DMT400005362
>t0000374_2927	Score: 2.5	PGSC0003DMG400004277|PGSC0003DMT400010921
>t0000374_2927	Score: 2.5	PGSC0003DMG400004277|PGSC0003DMT400010920
>t0000374_2927	Score: 2.5	PGSC0003DMG400004277|PGSC0003DMT400010922
>t0000374_2927	Score: 2.5	PGSC0003DMG400010924|PGSC0003DMT400028338
>t0000374_2927	Score: 2.5	PGSC0003DMG400009375|PGSC0003DMT400024261
>t0000374_2927	Score: 2.5	PGSC0003DMG400021881|PGSC0003DMT400056322
>t0000374_2927	Score: 2.5	PGSC0003DMG400028711|PGSC0003DMT400073888
>t0000374_2927	Score: 2.5	PGSC0003DMG402025647|PGSC0003DMT400065888
>t0000374_2927	Score: 2.5	PGSC0003DMG402025647|PGSC0003DMT400065891
>t0000374_2927	Score: 2.5	PGSC0003DMG400035998|PGSC0003DMT400086427
>t0000374_2927	Score: 2.5	PGSC0003DMG400040278|PGSC0003DMT400090707
>t0000374_2927	Score: 2.5	PGSC0003DMG400035915|PGSC0003DMT400086344
>t0000375_2903	Score: 2.5	PGSC0003DMG400009927|PGSC0003DMT400025711
>t0000375_2903	Score: 2.5	PGSC0003DMG401021671|PGSC0003DMT400055799
>t0000375_2903	Score: 2.0	PGSC0003DMG400022394|PGSC0003DMT400057680
>t0000375_2903	Score: 2.5	PGSC0003DMG400016376|PGSC0003DMT400042206
>t0000375_2903	Score: 2.5	PGSC0003DMG400018733|PGSC0003DMT400048223
>t0000375_2903	Score: 2.5	PGSC0003DMG400023333|PGSC0003DMT400059966
>t0000375_2903	Score: 2.5	PGSC0003DMG400024764|PGSC0003DMT400063717
>t0000375_2903	Score: 2.5	PGSC0003DMG400024764|PGSC0003DMT400063716
>t0000375_2903	Score: 2.5	PGSC0003DMG400029584|PGSC0003DMT400076080
>t0000375_2903	Score: 2.5	PGSC0003DMG400024764|PGSC0003DMT400063715
>t0000375_2903	Score: 2.2	PGSC0003DMG400037246|PGSC0003DMT400087675
>t0000376_2894	Score: 2.5	PGSC0003DMG400002609|PGSC0003DMT400006713
>t0000376_2894	Score: 2.5	PGSC0003DMG400030216|PGSC0003DMT400077660
>t0000376_2894	Score: 2.5	PGSC0003DMG400030216|PGSC0003DMT400077657
>t0000376_2894	Score: 2.5	PGSC0003DMG400042659|PGSC0003DMT400093088
>t0000377_2872	Score: 2.5	PGSC0003DMG400020333|PGSC0003DMT400052379
>t0000377_2872	Score: 2.5	PGSC0003DMG400020333|PGSC0003DMT400052380
>t0000378_2869	Score: 2.5	PGSC0003DMG400003002|PGSC0003DMT400007766
>t0000378_2869	Score: 2.5	PGSC0003DMG400028343|PGSC0003DMT400072859
>t0000378_2869	Score: 2.5	PGSC0003DMG400028343|PGSC0003DMT400072858
>t0000380_2850	Score: 2.2	PGSC0003DMG400019812|PGSC0003DMT400051028
>t0000382_2837	Score: 2.2	PGSC0003DMG401000527|PGSC0003DMT400001423
>t0000382_2837	Score: 2.2	PGSC0003DMG401000527|PGSC0003DMT400001421
>t0000382_2837	Score: 2.2	PGSC0003DMG401000527|PGSC0003DMT400001422
>t0000382_2837	Score: 2.2	PGSC0003DMG401000527|PGSC0003DMT400001420
>t0000382_2837	Score: 2.5	PGSC0003DMG402001782|PGSC0003DMT400004477
>t0000382_2837	Score: 2.0	PGSC0003DMG400005299|PGSC0003DMT400013566
>t0000382_2837	Score: 2.5	PGSC0003DMG400013151|PGSC0003DMT400034205
>t0000382_2837	Score: 2.5	PGSC0003DMG400013151|PGSC0003DMT400034206
>t0000382_2837	Score: 2.5	PGSC0003DMG400013151|PGSC0003DMT400034204
>t0000382_2837	Score: 2.2	PGSC0003DMG401018402|PGSC0003DMT400047348
>t0000382_2837	Score: 2.5	PGSC0003DMG400045075|PGSC0003DMT400095504
>t0000383_2828	Score: 2.5	EPlSTUG00000001802|EPlSTUT00000001802
>t0000383_2828	Score: 2.2	PGSC0003DMG401023885|PGSC0003DMT400061377
>t0000383_2828	Score: 2.2	PGSC0003DMG401023885|PGSC0003DMT400061376
>t0000384_2827	Score: 2.5	PGSC0003DMG400001536|PGSC0003DMT400003894
>t0000384_2827	Score: 2.5	PGSC0003DMG400011517|PGSC0003DMT400030010
>t0000384_2827	Score: 2.5	PGSC0003DMG401011526|PGSC0003DMT400030039
>t0000384_2827	Score: 2.5	PGSC0003DMG400011523|PGSC0003DMT400030030
>t0000384_2827	Score: 2.5	PGSC0003DMG400011517|PGSC0003DMT400030011
>t0000384_2827	Score: 2.5	PGSC0003DMG401008996|PGSC0003DMT400023233
>t0000384_2827	Score: 2.5	PGSC0003DMG400011525|PGSC0003DMT400030034
>t0000384_2827	Score: 2.5	PGSC0003DMG400011527|PGSC0003DMT400030042
>t0000384_2827	Score: 2.5	PGSC0003DMG400027555|PGSC0003DMT400070851
>t0000384_2827	Score: 2.2	PGSC0003DMG400025665|PGSC0003DMT400065940
>t0000384_2827	Score: 2.5	PGSC0003DMG400027555|PGSC0003DMT400070850
>t0000384_2827	Score: 2.5	PGSC0003DMG400032582|PGSC0003DMT400082505
>t0000384_2827	Score: 2.5	PGSC0003DMG400032584|PGSC0003DMT400082507
>t0000385_2826	Score: 2.5	PGSC0003DMG400005930|PGSC0003DMT400015183
>t0000386_2824	Score: 2.5	PGSC0003DMG401000097|PGSC0003DMT400000290
>t0000386_2824	Score: 2.2	PGSC0003DMG400000416|PGSC0003DMT400001101
>t0000386_2824	Score: 2.2	PGSC0003DMG400000416|PGSC0003DMT400001100
>t0000386_2824	Score: 2.5	PGSC0003DMG401002683|PGSC0003DMT400006922
>t0000386_2824	Score: 2.5	PGSC0003DMG401002683|PGSC0003DMT400006923
>t0000386_2824	Score: 2.5	PGSC0003DMG401002683|PGSC0003DMT400006917
>t0000386_2824	Score: 2.5	PGSC0003DMG401002683|PGSC0003DMT400006919
>t0000386_2824	Score: 2.5	PGSC0003DMG401002683|PGSC0003DMT400006921
>t0000386_2824	Score: 2.5	PGSC0003DMG401002683|PGSC0003DMT400006920
>t0000386_2824	Score: 2.0	PGSC0003DMG400013736|PGSC0003DMT400035715
>t0000386_2824	Score: 2.0	PGSC0003DMG400013736|PGSC0003DMT400035714
>t0000386_2824	Score: 2.5	PGSC0003DMG400018648|PGSC0003DMT400047996
>t0000386_2824	Score: 2.5	PGSC0003DMG400018648|PGSC0003DMT400047997
>t0000386_2824	Score: 2.5	PGSC0003DMG400016767|PGSC0003DMT400043200
>t0000386_2824	Score: 2.5	PGSC0003DMG400018423|PGSC0003DMT400047404
>t0000386_2824	Score: 2.5	PGSC0003DMG400027335|PGSC0003DMT400070306
>t0000386_2824	Score: 2.5	PGSC0003DMG400027335|PGSC0003DMT400070305
>t0000388_2805	Score: 2.5	PGSC0003DMG400003514|PGSC0003DMT400009045
>t0000388_2805	Score: 2.5	PGSC0003DMG400003514|PGSC0003DMT400009046
>t0000388_2805	Score: 2.2	PGSC0003DMG400023411|PGSC0003DMT400060185
>t0000390_2801	Score: 1.8	PGSC0003DMG400012627|PGSC0003DMT400032871
>t0000390_2801	Score: 2.5	PGSC0003DMG400007967|PGSC0003DMT400020565
>t0000390_2801	Score: 2.5	PGSC0003DMG400007967|PGSC0003DMT400020563
>t0000390_2801	Score: 1.8	PGSC0003DMG400012627|PGSC0003DMT400032869
>t0000390_2801	Score: 2.5	PGSC0003DMG400007967|PGSC0003DMT400020564
>t0000392_2777	Score: 2.5	PGSC0003DMG400007110|PGSC0003DMT400018306
>t0000392_2777	Score: 2.5	PGSC0003DMG400007110|PGSC0003DMT400018305
>t0000392_2777	Score: 2.5	PGSC0003DMG400003485|PGSC0003DMT400008947
>t0000393_2773	Score: 2.0	EPlSTUG00000002484|EPlSTUT00000002484
>t0000393_2773	Score: 2.0	EPlSTUG00000003704|EPlSTUT00000003704
>t0000393_2773	Score: 2.5	EPlSTUG00000002648|EPlSTUT00000002648
>t0000393_2773	Score: 2.5	PGSC0003DMG401009270|PGSC0003DMT400023968
>t0000393_2773	Score: 2.5	PGSC0003DMG400008553|PGSC0003DMT400022056
>t0000393_2773	Score: 2.5	PGSC0003DMG400020268|PGSC0003DMT400052248
>t0000393_2773	Score: 2.5	PGSC0003DMG400020268|PGSC0003DMT400052249
>t0000393_2773	Score: 2.0	PGSC0003DMG400026384|PGSC0003DMT400067834
>t0000393_2773	Score: 2.0	PGSC0003DMG400025227|PGSC0003DMT400064957
>t0000393_2773	Score: 1.5	PGSC0003DMG400025227|PGSC0003DMT400064958
>t0000393_2773	Score: 2.5	PGSC0003DMG401028848|PGSC0003DMT400074234
>t0000393_2773	Score: 2.5	PGSC0003DMG401028848|PGSC0003DMT400074236
>t0000393_2773	Score: 2.0	PGSC0003DMG400026384|PGSC0003DMT400067833
>t0000393_2773	Score: 1.5	PGSC0003DMG400025227|PGSC0003DMT400064954
>t0000393_2773	Score: 2.5	PGSC0003DMG401028848|PGSC0003DMT400074237
>t0000393_2773	Score: 2.0	PGSC0003DMG400026384|PGSC0003DMT400067835
>t0000393_2773	Score: 2.0	PGSC0003DMG400030394|PGSC0003DMT400078145
>t0000393_2773	Score: 1.5	PGSC0003DMG400025227|PGSC0003DMT400064956
>t0000393_2773	Score: 2.0	PGSC0003DMG400036426|PGSC0003DMT400086855
>t0000393_2773	Score: 2.5	PGSC0003DMG400035412|PGSC0003DMT400085841
>t0000396_2768	Score: 2.5	PGSC0003DMG400001831|PGSC0003DMT400004618
>t0000396_2768	Score: 2.0	PGSC0003DMG400026338|PGSC0003DMT400067718
>t0000396_2768	Score: 2.0	PGSC0003DMG400026338|PGSC0003DMT400067720
>t0000396_2768	Score: 2.0	PGSC0003DMG400026338|PGSC0003DMT400067721
>t0000396_2768	Score: 2.0	PGSC0003DMG400026338|PGSC0003DMT400067719
>t0000397_2762	Score: 2.5	PGSC0003DMG401003900|PGSC0003DMT400009960
>t0000397_2762	Score: 2.5	PGSC0003DMG401003900|PGSC0003DMT400009959
>t0000397_2762	Score: 2.5	PGSC0003DMG400013158|PGSC0003DMT400034226
>t0000397_2762	Score: 1.8	PGSC0003DMG400019812|PGSC0003DMT400051028
>t0000398_2757	Score: 2.5	PGSC0003DMG400000132|PGSC0003DMT400000377
>t0000398_2757	Score: 2.5	PGSC0003DMG400002044|PGSC0003DMT400005176
>t0000398_2757	Score: 2.5	PGSC0003DMG400002044|PGSC0003DMT400005175
>t0000398_2757	Score: 2.5	PGSC0003DMG400024280|PGSC0003DMT400062384
>t0000398_2757	Score: 2.5	PGSC0003DMG400033910|PGSC0003DMT400084282
>t0000399_2754	Score: 2.2	PGSC0003DMG400005610|PGSC0003DMT400014300
>t0000399_2754	Score: 2.2	PGSC0003DMG400004168|PGSC0003DMT400010674
>t0000399_2754	Score: 2.2	PGSC0003DMG400005610|PGSC0003DMT400014301
>t0000399_2754	Score: 2.2	PGSC0003DMG400004168|PGSC0003DMT400010675
>t0000399_2754	Score: 2.2	PGSC0003DMG400005610|PGSC0003DMT400014302
>t0000399_2754	Score: 2.2	PGSC0003DMG400004168|PGSC0003DMT400010676
>t0000399_2754	Score: 2.2	PGSC0003DMG400004168|PGSC0003DMT400010677
>t0000399_2754	Score: 2.2	PGSC0003DMG400004168|PGSC0003DMT400010678
>t0000399_2754	Score: 2.5	PGSC0003DMG400025528|PGSC0003DMT400065619
>t0000399_2754	Score: 2.5	PGSC0003DMG400025528|PGSC0003DMT400065618
>t0000399_2754	Score: 2.0	PGSC0003DMG402028807|PGSC0003DMT400074114
>t0000399_2754	Score: 2.0	PGSC0003DMG402028807|PGSC0003DMT400074116
>t0000399_2754	Score: 2.0	PGSC0003DMG402028807|PGSC0003DMT400074115
>t0000399_2754	Score: 2.5	PGSC0003DMG400034334|PGSC0003DMT400084763
>t0000400_2748	Score: 2.5	PGSC0003DMG402004779|PGSC0003DMT400012194
>t0000400_2748	Score: 2.5	PGSC0003DMG401004779|PGSC0003DMT400012195
>t0000401_2748	Score: 2.5	PGSC0003DMG400001914|PGSC0003DMT400004815
>t0000401_2748	Score: 2.2	PGSC0003DMG400006563|PGSC0003DMT400016783
>t0000401_2748	Score: 2.2	PGSC0003DMG400006563|PGSC0003DMT400016782
>t0000401_2748	Score: 2.5	PGSC0003DMG400012458|PGSC0003DMT400032434
>t0000401_2748	Score: 2.2	PGSC0003DMG401013422|PGSC0003DMT400034913
>t0000401_2748	Score: 2.0	PGSC0003DMG400020265|PGSC0003DMT400052241
>t0000401_2748	Score: 2.5	PGSC0003DMG400016279|PGSC0003DMT400041975
>t0000401_2748	Score: 2.0	PGSC0003DMG401018810|PGSC0003DMT400048424
>t0000401_2748	Score: 2.2	PGSC0003DMG400046610|PGSC0003DMT400097039
>t0000403_2733	Score: 2.5	PGSC0003DMG400010443|PGSC0003DMT400027076
>t0000403_2733	Score: 2.5	PGSC0003DMG400010443|PGSC0003DMT400027074
>t0000403_2733	Score: 2.0	PGSC0003DMG400008208|PGSC0003DMT400021198
>t0000403_2733	Score: 2.5	PGSC0003DMG400013896|PGSC0003DMT400036085
>t0000403_2733	Score: 2.2	PGSC0003DMG400023790|PGSC0003DMT400061145
>t0000404_2733	Score: 2.5	PGSC0003DMG400013258|PGSC0003DMT400034494
>t0000404_2733	Score: 2.5	PGSC0003DMG400013258|PGSC0003DMT400034492
>t0000404_2733	Score: 2.5	PGSC0003DMG400013258|PGSC0003DMT400034493
>t0000404_2733	Score: 2.5	PGSC0003DMG400018491|PGSC0003DMT400047583
>t0000404_2733	Score: 2.5	PGSC0003DMG400018491|PGSC0003DMT400047580
>t0000404_2733	Score: 2.5	PGSC0003DMG400018491|PGSC0003DMT400047584
>t0000404_2733	Score: 2.5	PGSC0003DMG400018491|PGSC0003DMT400047582
>t0000404_2733	Score: 1.8	PGSC0003DMG400029384|PGSC0003DMT400075563
>t0000406_2727	Score: 2.0	PGSC0003DMG400027555|PGSC0003DMT400070851
>t0000406_2727	Score: 2.0	PGSC0003DMG400027555|PGSC0003DMT400070850
>t0000406_2727	Score: 2.5	PGSC0003DMG400040957|PGSC0003DMT400091386
>t0000406_2727	Score: 2.5	PGSC0003DMG400033651|PGSC0003DMT400083909
>t0000406_2727	Score: 2.5	PGSC0003DMG400033862|PGSC0003DMT400084179
>t0000407_2722	Score: 2.5	PGSC0003DMG400005650|PGSC0003DMT400014403
>t0000409_2711	Score: 2.0	PGSC0003DMG400000161|PGSC0003DMT400000471
>t0000409_2711	Score: 2.5	PGSC0003DMG400007791|PGSC0003DMT400020113
>t0000409_2711	Score: 2.5	PGSC0003DMG400023092|PGSC0003DMT400059435
>t0000409_2711	Score: 2.5	PGSC0003DMG401018810|PGSC0003DMT400048422
>t0000409_2711	Score: 2.5	PGSC0003DMG401018810|PGSC0003DMT400048424
>t0000409_2711	Score: 2.5	PGSC0003DMG401028489|PGSC0003DMT400073309
>t0000409_2711	Score: 2.5	PGSC0003DMG401028489|PGSC0003DMT400073310
>t0000409_2711	Score: 2.2	PGSC0003DMG400027925|PGSC0003DMT400071784
>t0000410_2706	Score: 2.5	PGSC0003DMG401003998|PGSC0003DMT400010208
>t0000410_2706	Score: 2.5	PGSC0003DMG402003998|PGSC0003DMT400010207
>t0000410_2706	Score: 2.5	PGSC0003DMG401003998|PGSC0003DMT400010210
>t0000410_2706	Score: 2.5	PGSC0003DMG402003998|PGSC0003DMT400010206
>t0000410_2706	Score: 2.5	PGSC0003DMG401003998|PGSC0003DMT400010209
>t0000410_2706	Score: 2.5	PGSC0003DMG401020085|PGSC0003DMT400051733
>t0000414_2686	Score: 2.2	PGSC0003DMG400004069|PGSC0003DMT400010419
>t0000414_2686	Score: 2.2	PGSC0003DMG400004069|PGSC0003DMT400010418
>t0000414_2686	Score: 2.2	PGSC0003DMG400004069|PGSC0003DMT400010417
>t0000414_2686	Score: 2.0	PGSC0003DMG401019352|PGSC0003DMT400049820
>t0000414_2686	Score: 2.0	PGSC0003DMG401019352|PGSC0003DMT400049817
>t0000414_2686	Score: 2.5	PGSC0003DMG400025148|PGSC0003DMT400064740
>t0000414_2686	Score: 2.2	PGSC0003DMG402024899|PGSC0003DMT400064077
>t0000414_2686	Score: 2.5	PGSC0003DMG400045769|PGSC0003DMT400096198
>t0000415_2679	Score: 2.5	PGSC0003DMG400003319|PGSC0003DMT400008577
>t0000417_2678	Score: 2.5	PGSC0003DMG400004989|PGSC0003DMT400012803
>t0000417_2678	Score: 2.5	PGSC0003DMG400015214|PGSC0003DMT400039340
>t0000417_2678	Score: 2.5	PGSC0003DMG400013982|PGSC0003DMT400036346
>t0000417_2678	Score: 2.5	PGSC0003DMG400013982|PGSC0003DMT400036345
>t0000417_2678	Score: 2.5	PGSC0003DMG400017798|PGSC0003DMT400045883
>t0000417_2678	Score: 2.5	PGSC0003DMG400025145|PGSC0003DMT400064730
>t0000417_2678	Score: 2.5	PGSC0003DMG400029581|PGSC0003DMT400076068
>t0000417_2678	Score: 2.5	PGSC0003DMG400025145|PGSC0003DMT400064731
>t0000417_2678	Score: 2.5	PGSC0003DMG400025145|PGSC0003DMT400064729
>t0000419_2673	Score: 2.0	PGSC0003DMG400002613|PGSC0003DMT400006731
>t0000419_2673	Score: 2.5	PGSC0003DMG400001584|PGSC0003DMT400004020
>t0000419_2673	Score: 2.2	PGSC0003DMG400003910|PGSC0003DMT400009988
>t0000419_2673	Score: 2.0	PGSC0003DMG401016989|PGSC0003DMT400043766
>t0000419_2673	Score: 2.2	PGSC0003DMG402030235|PGSC0003DMT400077717
>t0000419_2673	Score: 2.5	PGSC0003DMG400026516|PGSC0003DMT400068180
>t0000419_2673	Score: 2.2	PGSC0003DMG402030236|PGSC0003DMT400077723
>t0000420_2666	Score: 2.5	PGSC0003DMG400000886|PGSC0003DMT400002317
>t0000420_2666	Score: 2.2	PGSC0003DMG400001150|PGSC0003DMT400002938
>t0000420_2666	Score: 2.2	PGSC0003DMG400001150|PGSC0003DMT400002935
>t0000425_2644	Score: 2.2	PGSC0003DMG400004571|PGSC0003DMT400011621
>t0000425_2644	Score: 2.5	PGSC0003DMG400003787|PGSC0003DMT400009693
>t0000425_2644	Score: 2.2	PGSC0003DMG400004571|PGSC0003DMT400011622
>t0000425_2644	Score: 2.2	PGSC0003DMG400007837|PGSC0003DMT400020267
>t0000425_2644	Score: 2.2	PGSC0003DMG400007837|PGSC0003DMT400020270
>t0000425_2644	Score: 2.2	PGSC0003DMG400007837|PGSC0003DMT400020269
>t0000425_2644	Score: 2.5	PGSC0003DMG400010406|PGSC0003DMT400026980
>t0000425_2644	Score: 2.5	PGSC0003DMG400008314|PGSC0003DMT400021428
>t0000425_2644	Score: 2.5	PGSC0003DMG400024840|PGSC0003DMT400063908
>t0000426_2640	Score: 2.2	PGSC0003DMG400027168|PGSC0003DMT400069866
>t0000426_2640	Score: 2.2	PGSC0003DMG402023951|PGSC0003DMT400061542
>t0000426_2640	Score: 2.2	PGSC0003DMG402027116|PGSC0003DMT400069729
>t0000427_2638	Score: 2.2	PGSC0003DMG400005590|PGSC0003DMT400014252
>t0000427_2638	Score: 2.2	PGSC0003DMG400005590|PGSC0003DMT400014251
>t0000427_2638	Score: 2.5	PGSC0003DMG400012611|PGSC0003DMT400032839
>t0000427_2638	Score: 2.5	PGSC0003DMG401011559|PGSC0003DMT400030208
>t0000427_2638	Score: 2.5	PGSC0003DMG400022394|PGSC0003DMT400057680
>t0000427_2638	Score: 2.5	PGSC0003DMG400030625|PGSC0003DMT400078705
>t0000428_2632	Score: 2.5	PGSC0003DMG400000456|PGSC0003DMT400001214
>t0000428_2632	Score: 2.5	PGSC0003DMG400000456|PGSC0003DMT400001215
>t0000428_2632	Score: 2.5	PGSC0003DMG401000515|PGSC0003DMT400001382
>t0000428_2632	Score: 1.5	PGSC0003DMG400007121|PGSC0003DMT400018338
>t0000428_2632	Score: 2.2	PGSC0003DMG400004294|PGSC0003DMT400010965
>t0000428_2632	Score: 2.5	PGSC0003DMG401008055|PGSC0003DMT400020812
>t0000428_2632	Score: 2.0	PGSC0003DMG400022254|PGSC0003DMT400057307
>t0000428_2632	Score: 2.0	PGSC0003DMG400022254|PGSC0003DMT400057305
>t0000428_2632	Score: 2.0	PGSC0003DMG400017507|PGSC0003DMT400045133
>t0000428_2632	Score: 2.0	PGSC0003DMG400022254|PGSC0003DMT400057306
>t0000429_2631	Score: 2.5	PGSC0003DMG400018702|PGSC0003DMT400048133
>t0000430_2626	Score: 2.0	PGSC0003DMG400001153|PGSC0003DMT400002949
>t0000430_2626	Score: 2.0	PGSC0003DMG400001153|PGSC0003DMT400002948
>t0000430_2626	Score: 2.5	PGSC0003DMG400003212|PGSC0003DMT400008338
>t0000430_2626	Score: 2.5	PGSC0003DMG400003290|PGSC0003DMT400008505
>t0000430_2626	Score: 2.5	PGSC0003DMG400012297|PGSC0003DMT400032046
>t0000430_2626	Score: 2.5	PGSC0003DMG400013808|PGSC0003DMT400035865
>t0000430_2626	Score: 2.5	PGSC0003DMG400013808|PGSC0003DMT400035863
>t0000430_2626	Score: 2.5	PGSC0003DMG400013808|PGSC0003DMT400035867
>t0000430_2626	Score: 2.5	PGSC0003DMG400013808|PGSC0003DMT400035866
>t0000430_2626	Score: 2.5	PGSC0003DMG400012297|PGSC0003DMT400032045
>t0000430_2626	Score: 2.5	PGSC0003DMG400013808|PGSC0003DMT400035864
>t0000430_2626	Score: 2.5	PGSC0003DMG400013181|PGSC0003DMT400034284
>t0000430_2626	Score: 2.5	PGSC0003DMG400013808|PGSC0003DMT400035862
>t0000430_2626	Score: 2.0	PGSC0003DMG400014140|PGSC0003DMT400036661
>t0000430_2626	Score: 2.5	PGSC0003DMG400010663|PGSC0003DMT400027656
>t0000430_2626	Score: 2.5	PGSC0003DMG400012297|PGSC0003DMT400032044
>t0000430_2626	Score: 2.5	PGSC0003DMG400020063|PGSC0003DMT400051665
>t0000430_2626	Score: 2.5	PGSC0003DMG400022716|PGSC0003DMT400058492
>t0000430_2626	Score: 2.5	PGSC0003DMG400017864|PGSC0003DMT400046038
>t0000430_2626	Score: 2.5	PGSC0003DMG400020063|PGSC0003DMT400051664
>t0000430_2626	Score: 1.8	PGSC0003DMG400016432|PGSC0003DMT400042365
>t0000430_2626	Score: 2.5	PGSC0003DMG400022716|PGSC0003DMT400058493
>t0000432_2615	Score: 2.5	PGSC0003DMG402001347|PGSC0003DMT400003414
>t0000432_2615	Score: 2.5	PGSC0003DMG400007485|PGSC0003DMT400019352
>t0000432_2615	Score: 2.0	PGSC0003DMG401012812|PGSC0003DMT400033353
>t0000433_2610	Score: 2.0	PGSC0003DMG400002044|PGSC0003DMT400005176
>t0000433_2610	Score: 2.0	PGSC0003DMG400002044|PGSC0003DMT400005175
>t0000433_2610	Score: 2.5	PGSC0003DMG400007555|PGSC0003DMT400019542
>t0000433_2610	Score: 2.2	PGSC0003DMG402022673|PGSC0003DMT400058373
>t0000433_2610	Score: 2.2	PGSC0003DMG402022673|PGSC0003DMT400058370
>t0000433_2610	Score: 2.2	PGSC0003DMG402022673|PGSC0003DMT400058372
>t0000433_2610	Score: 2.5	PGSC0003DMG400020392|PGSC0003DMT400052557
>t0000434_2600	Score: 2.2	PGSC0003DMG401019352|PGSC0003DMT400049820
>t0000434_2600	Score: 2.2	PGSC0003DMG401019352|PGSC0003DMT400049817
>t0000437_2595	Score: 2.5	PGSC0003DMG401002548|PGSC0003DMT400006537
>t0000437_2595	Score: 2.5	PGSC0003DMG401002548|PGSC0003DMT400006539
>t0000437_2595	Score: 2.5	PGSC0003DMG401002548|PGSC0003DMT400006533
>t0000438_2591	Score: 1.5	EPlSTUG00000000883|EPlSTUT00000000883
>t0000438_2591	Score: 2.5	PGSC0003DMG400019804|PGSC0003DMT400051008
>t0000438_2591	Score: 2.5	PGSC0003DMG400028533|PGSC0003DMT400073450
>t0000438_2591	Score: 2.5	PGSC0003DMG400031405|PGSC0003DMT400080647
>t0000438_2591	Score: 2.2	PGSC0003DMG400030599|PGSC0003DMT400078624
>t0000438_2591	Score: 2.5	PGSC0003DMG400028533|PGSC0003DMT400073451
>t0000438_2591	Score: 2.5	PGSC0003DMG400031405|PGSC0003DMT400080649
>t0000439_2590	Score: 2.5	PGSC0003DMG400000933|PGSC0003DMT400002451
>t0000439_2590	Score: 2.0	PGSC0003DMG401012750|PGSC0003DMT400033203
>t0000439_2590	Score: 1.8	PGSC0003DMG400023247|PGSC0003DMT400059781
>t0000439_2590	Score: 2.2	PGSC0003DMG400019754|PGSC0003DMT400050853
>t0000439_2590	Score: 2.2	PGSC0003DMG400019754|PGSC0003DMT400050851
>t0000439_2590	Score: 2.2	PGSC0003DMG400023557|PGSC0003DMT400060554
>t0000439_2590	Score: 1.8	PGSC0003DMG400023247|PGSC0003DMT400059780
>t0000439_2590	Score: 2.2	PGSC0003DMG400019754|PGSC0003DMT400050852
>t0000440_2587	Score: 2.2	PGSC0003DMG400001150|PGSC0003DMT400002938
>t0000440_2587	Score: 2.2	PGSC0003DMG400001150|PGSC0003DMT400002935
>t0000440_2587	Score: 2.2	PGSC0003DMG402006653|PGSC0003DMT400017033
>t0000440_2587	Score: 2.5	PGSC0003DMG400008801|PGSC0003DMT400022695
>t0000440_2587	Score: 2.5	PGSC0003DMG400008801|PGSC0003DMT400022693
>t0000440_2587	Score: 2.5	PGSC0003DMG400008801|PGSC0003DMT400022694
>t0000441_2581	Score: 2.5	PGSC0003DMG400006804|PGSC0003DMT400017547
>t0000443_2579	Score: 2.5	PGSC0003DMG400001387|PGSC0003DMT400003516
>t0000443_2579	Score: 2.5	PGSC0003DMG400004811|PGSC0003DMT400012259
>t0000443_2579	Score: 2.5	PGSC0003DMG400011555|PGSC0003DMT400030193
>t0000443_2579	Score: 2.0	PGSC0003DMG400014482|PGSC0003DMT400037547
>t0000443_2579	Score: 2.0	PGSC0003DMG400014482|PGSC0003DMT400037548
>t0000443_2579	Score: 2.5	PGSC0003DMG400019897|PGSC0003DMT400051236
>t0000443_2579	Score: 2.5	PGSC0003DMG400017259|PGSC0003DMT400044463
>t0000443_2579	Score: 2.5	PGSC0003DMG400017259|PGSC0003DMT400044464
>t0000443_2579	Score: 2.0	PGSC0003DMG403025826|PGSC0003DMT400066412
>t0000443_2579	Score: 2.0	PGSC0003DMG403025826|PGSC0003DMT400066411
>t0000443_2579	Score: 2.5	PGSC0003DMG400032548|PGSC0003DMT400082457
>t0000447_2559	Score: 2.0	PGSC0003DMG400005039|PGSC0003DMT400012932
>t0000447_2559	Score: 2.5	PGSC0003DMG400007055|PGSC0003DMT400018179
>t0000447_2559	Score: 2.0	PGSC0003DMG400005039|PGSC0003DMT400012931
>t0000447_2559	Score: 2.5	PGSC0003DMG400008736|PGSC0003DMT400022536
>t0000447_2559	Score: 2.5	PGSC0003DMG400008736|PGSC0003DMT400022537
[truncated: 58,514 more rows]
